# Supplementary material for: Study protocol for a real-world evaluation of an integrated child and family health hub for migrant and refugee women
Source: PubMed Central journal article supplement — BMJ Open. 2022 Aug 30;12(8):e061002. doi: 10.1136/bmjopen-2022-061002 (PMC10439340; doi:10.1136/bmjopen-2022-061002), 2022-08-30
Supplement: bmjopen-2022-061002.draft_revisions.pdf [file bmjopen-2022-061002.draft_revisions.pdf]

# BMJ Open

BMJ Open is committed to open peer review. As part of this commitment we make the peer review history of every article we publish publicly available.

When an article is published we post the peer reviewers' comments and the authors' responses online. We also post the versions of the paper that were used during peer review. These are the versions that the peer review comments apply to.

The versions of the paper that follow are the versions that were submitted during the peer review process. They are not the versions of record or the final published versions. They should not be cited or distributed as the published version of this manuscript.

BMJ Open is an open access journal and the full, final, typeset and author-corrected version of record of the manuscript is available on our site with no access controls, subscription charges or pay-per-view fees (<http://bmjopen.bmj.com>).

If you have any questions on BMJ Open's open peer review process please email [info.bmjopen@bmj.com](mailto:info.bmjopen@bmj.com)

# BMJ Open

## A non-randomised control trial, implementation evaluation, and economic evaluation of an integrated child and family health hub (FDCC) for migrant and refugee women

|                               |                                                                                                                                                                                                                                                                                                                                                                                                                                                                                                                                                                                                                                                                                                                                                                                                                                                                                                                                                                                                                                                                                                                                                                                                                                              |
|-------------------------------|----------------------------------------------------------------------------------------------------------------------------------------------------------------------------------------------------------------------------------------------------------------------------------------------------------------------------------------------------------------------------------------------------------------------------------------------------------------------------------------------------------------------------------------------------------------------------------------------------------------------------------------------------------------------------------------------------------------------------------------------------------------------------------------------------------------------------------------------------------------------------------------------------------------------------------------------------------------------------------------------------------------------------------------------------------------------------------------------------------------------------------------------------------------------------------------------------------------------------------------------|
| Journal:                      | <i>BMJ Open</i>                                                                                                                                                                                                                                                                                                                                                                                                                                                                                                                                                                                                                                                                                                                                                                                                                                                                                                                                                                                                                                                                                                                                                                                                                              |
| Manuscript ID                 | bmjopen-2022-061002                                                                                                                                                                                                                                                                                                                                                                                                                                                                                                                                                                                                                                                                                                                                                                                                                                                                                                                                                                                                                                                                                                                                                                                                                          |
| Article Type:                 | Protocol                                                                                                                                                                                                                                                                                                                                                                                                                                                                                                                                                                                                                                                                                                                                                                                                                                                                                                                                                                                                                                                                                                                                                                                                                                     |
| Date Submitted by the Author: | 12-Jan-2022                                                                                                                                                                                                                                                                                                                                                                                                                                                                                                                                                                                                                                                                                                                                                                                                                                                                                                                                                                                                                                                                                                                                                                                                                                  |
| Complete List of Authors:     | Hodgins, Michael; UNSW, Ostojsic, Katarina; University of New South Wales<br>Hu, Nan; UNSW, Lawson, K; Western Sydney University<br>Samir, Nora; University of New South Wales - Randwick Campus, School of Women's and Children's Health<br>Webster, Amanda; South Eastern Sydney Local Health District<br>Rogers, Helen; South Eastern Sydney Local Health District,<br>Henry, Amanda ; University of New South Wales Faculty of Medicine, Women's and Children's Health<br>Murphy, Elisabeth; University of New South Wales; New South Wales Ministry of Health<br>Lingam, Raghu; University of New South Wales<br>Raman, Shanti; University of New South Wales School of Women's and Children's Health, ; South Western Sydney Local Health District, Community Paediatrics<br>Mendoza Diaz , Antonio; University of New South Wales, Discipline of Psychiatry<br>Dadich, Ann; Western Sydney University, School of Business<br>Eapen, Valsamma; South Western Sydney Local Health District, ICAMHS; University of New South Wales, School of Psychiatry<br>Rimes, Tania; South Eastern Sydney Local Health District, Child Youth and Family Services<br>Woolfenden, Susan ; University of New South Wales; Sydney Local Health District |
| Keywords:                     | Community child health < PAEDIATRICS, Maternal medicine < OBSTETRICS, Organisation of health services < HEALTH SERVICES ADMINISTRATION & MANAGEMENT, PAEDIATRICS, PUBLIC HEALTH                                                                                                                                                                                                                                                                                                                                                                                                                                                                                                                                                                                                                                                                                                                                                                                                                                                                                                                                                                                                                                                              |
|                               |                                                                                                                                                                                                                                                                                                                                                                                                                                                                                                                                                                                                                                                                                                                                                                                                                                                                                                                                                                                                                                                                                                                                                                                                                                              |

SCHOLARONE™  
Manuscripts

1  
2  
3 **TITLE:** A non-randomised control trial, implementation evaluation, and economic  
4 evaluation of an integrated child and family health hub (FDCC) for migrant and  
5 refugee women  
6  
7  
8

9  
10  
11 **AUTHORS:** Michael Hodgins<sup>1</sup>, Katarina Ostojic<sup>1</sup>, Nan Hu<sup>1</sup>, Kenny Lawson<sup>2</sup>, Nora Samir<sup>1</sup>,  
12 Amanda Webster<sup>3</sup>, Helen Rogers<sup>3</sup>, Amanda Henry<sup>1</sup>, Elisabeth Murphy<sup>4</sup>, Raghu  
13 Lingam<sup>1,5</sup>, Shanti Raman<sup>6</sup>, Antonio Mendoza Diaz<sup>1</sup>, Ann Dadich<sup>7</sup>, Valsamma  
14 Eapen<sup>1,6</sup>, Tania Rimes<sup>3\*</sup>, Sue Woolfenden<sup>1,8\*</sup>

15 On behalf of the FDCC Collaborative Group  
16  
17

### 18 **AFFILIATIONS**

19  
20 <sup>1</sup> University of New South Wales, NSW 2751

21  
22 <sup>2</sup> University of Sydney, NSW 2006

23  
24 <sup>3</sup> South Eastern Sydney Local Health District, NSW 2229

25  
26 <sup>4</sup> North Sydney Local Health District, NSW 2065

27  
28 <sup>5</sup> Sydney Children's Hospitals Network, Sydney, NSW, 2031

29  
30 <sup>6</sup> South Western Sydney Local Health District, NSW 2170

31  
32 <sup>7</sup> Western Sydney University, NSW 2150

33  
34 <sup>8</sup> Sydney Local Health District, NSW 2050

### 35 **CORRESPONDING AUTHORS\***

36  
37 Dr Michael Hodgins

38  
39 School of Women's & Children's Health

40  
41 UNSW

42  
43 Email: [michael.hodgins1@unsw.edu.au](mailto:michael.hodgins1@unsw.edu.au)

44  
45  
46  
47  
48 **KEYWORDS** Integrated care, community child health, maternal health, organisation of health  
49 services, paediatrics, public health  
50  
51

52  
53  
54 1  
55  
56  
57  
58  
59  
60

**WORD COUNTS**

Abstract: 299 words

Main text: 3,976 words (excluding title page, tables, and references)

**Protocol version:** version 1.0 (10.01.2022)

For peer review only

## ABSTRACT

**Introduction:** Continuity of child and family healthcare is vital for optimal child health and development for developmentally vulnerable children. Migrant and refugee communities are often at-risk of poor health outcomes, facing barriers to health service attendance including cultural, language, limited health literacy, discrimination, and unmet psychosocial needs. ‘Integrated health-social care hubs’ are physical hubs where health and social services are co-located, with shared referral pathways and care navigation. Our study will evaluate the impact, implementation, and cost-benefit of the First 2000 Days Care Connect (FDCC) integrated hub model for pregnant migrant and refugee women and their infants.

**Methods and analysis:** This study has three components. Component 1 is a non-randomised controlled trial to compare the FDCC model of care with usual care. This trial will allocate eligible women to intervention and control groups based on their geographical proximity to the Hub sites. Impact measures include: the proportion of children attending child and family health (CFH) nurse services and completing their CFH checks to 12 months of age; improved surveillance of growth and development in children up to 12 months, post-partum; improved breastfeeding rates; reduced emergency department presentations; and improve maternal wellbeing. Component 2 will involve a mixed-method implementation evaluation to clarify how and why FDCC was implemented within the sites to inform future roll-out Guided by the Consolidated Framework for Implementation Research and Proctor and colleague’s implementation outcomes taxonomy. Component 3 is a within-trial economic evaluation to assess the cost-effectiveness of the Hubs relative to usual care and the implementation costs if Hubs were scaled and replicated.

**Ethics and dissemination:** Ethical approval was granted by the South Eastern Sydney Local Health District Human Research Ethics Committee in July 2021 (Project ID: 020/ETH03295). Results will be submitted for publication in peer-reviewed journals and presented at relevant conferences.

**Trial registration:** ACTRN12621001088831

## ARTICLE SUMMARY

### Strength and limitations

- First Australian multi-site non-randomised controlled trial to test the effectiveness of integrated health-social care hubs.
- The model could be an exemplar for scaling up nationally and adapting to other populations who have barriers to accessing child and family health services.
- The non-randomised design of the trial has some limitations, particularly the inability to guarantee the comparability of the intervention and control groups.
- The model, tested in the New South Wales healthcare system, would potentially need further adaptation to be delivered in other health care settings.

### BACKGROUND AND RATIONALE

In New South Wales (NSW), Australia, 25% of children from migrant and refugee families are 'developmentally vulnerable'.<sup>1</sup> Developmental vulnerability is associated with undetected maternal postnatal depression, the early cessation of breastfeeding<sup>2</sup>, and parental unmet psychosocial needs (e.g., housing, domestic violence).<sup>3 4</sup> Children who are developmentally vulnerable are twice as likely to struggle at school, experience adverse childhood events and have poorer long-term health outcomes and higher healthcare costs.<sup>1 5-12</sup> These adverse childhood events can continue into adulthood, contributing up to 44% of adult morbidity.<sup>13 14</sup>

Continuity of care with regular child and family health (CFH) checks by local health district (LHD) employed child and family health nurses (CFHN) are the foundation for optimal child health and development. This is particularly the case for priority populations, including newly arrived migrant and refugee women, children, and their families.<sup>5</sup> However, these populations also experience significant barriers to services including cultural, language, limited health literacy, discrimination, and unmet psychosocial needs.<sup>15-31</sup> Families with greater disadvantage are at greater risk of developmental vulnerability and poorer maternal mental health. These families are less likely to engage with health services, particularly health promotion programs, like CFH checks.<sup>2-4 15 32-35</sup>

Australian policymakers identified service areas that need improvement to optimise outcomes in the

1  
2  
3 first 2,000 days of a child's life.<sup>5 36</sup> These include the transition from maternity to CFH services;  
4 increasing uptake and length of time families stay connected with CFH services; and supporting  
5 priority populations. Unfortunately, in NSW, two-thirds of children stop attending CFH services by  
6  
7 12 months of age,<sup>15 18-20</sup> further fragmenting care.  
8  
9

### 10 **Benefits of integrated health-social care hubs**

11  
12 To address the fragmented CFH services for priority populations, integrated health-social care hubs  
13 were established in multiple jurisdictions across Australia. These are physical hubs where health and  
14 social services are co-located, supported by care navigators and shared referral pathways.<sup>37 38</sup> Co-  
15 location and navigation support aims to remove barriers that hinder engagement between families and  
16 CFH services. However, the evidence-base for their effectiveness is limited. Our recent systematic  
17 review demonstrated the dearth of experimental trial evidence in Australia regarding physical CFH  
18 Hubs. Yet, individual studies have found Hub models increase access to CFH services and the  
19 identification of developmental vulnerability.<sup>39</sup> Additionally, a recent scoping review of models of  
20 care across the continuum of pregnancy, birth, and the postpartum period for women from migrant and  
21 refugee backgrounds in high-income countries highlighted an evidence gap for models that improved  
22 maternal and child infant health outcomes.<sup>8</sup>  
23  
24

25 Research led by some of the researchers<sup>8 40 41</sup> extended this evidence-base by showing the feasibility  
26 and efficacy of integrated CFH hubs and cross-cultural workers (CCW) models in South Eastern  
27 Sydney. These models support women and families to navigate maternity, CFH, and community-based  
28 services, providing continuity of care across the continuum of pregnancy and transition to CFH. The  
29 pilot interventions demonstrated that, for women and families from migrant and refugee populations:  
30 CFH services embedded in integrated hubs increased the completion rate of CFH checks from 30% to  
31 60% at 12-months and facilitated linkage with co-located non-government organisations.<sup>40 41</sup> Cross-  
32 cultural worker support in pregnancy was also highly rated by staff and pregnant women regarding  
33 support for pregnancy and linkage with services.<sup>42 43</sup>  
34  
35  
36  
37  
38  
39  
40  
41  
42  
43  
44  
45  
46  
47

### 48 **Current study: First 2000 Days Care Connect**

49  
50 *First 2000 Days Care Connect* (FDCC) is an integrated health-social care hub model that builds on  
51 these feasible and acceptable pilot interventions. The FDCC model involves co-located CFH services  
52  
53

54 5

and non-government organisations (NGO), including psychosocial support services (e.g., playgroups, domestic violence support, mental health support, early childhood education, family support). These services operate from a physical location to facilitate service collaboration, integration, and a community-led approach to local needs. This Hub is supported by care navigation, increasing continuity from maternity to CFH services.

## Objectives

The overall aim of the FDCC study is to evaluate: the impact of FDCC (an integrated CFH Hub) on attendance at CFHN services and completion of CFH checks, support of child growth and development, breastfeeding and maternal wellbeing, and meeting family psychosocial needs (Component 1); the process of implementing FDCC (Component 2); and the cost-effectiveness of FDCC (Component 3).

## METHODS AND ANALYSIS

### Study Setting

FDCC is a multisite study, conducted across three metropolitan LHDs in Greater Sydney, NSW – namely, SESLHD, SWSLHD, and NSLHD. Participants will be recruited from public and universally available antenatal services at participating public hospitals within the LHDs and receive services from CFHN services within each LHD.

### Recruitment and Consent

The study will recruit 240 women between November 2021 and April 2022. Eighty participants will be enrolled within SESLHD, NSLHD, and SWSLHD, with 40 allocated to the intervention arm (FDCC Hub) and 40 to the control arm (routine care). Potential participants are women attending antenatal clinics at the participating public hospitals within each study site and fulfilling the eligibility criteria (Table 1).

*Table 1: Inclusion and Exclusion Criteria*

| Inclusion criteria                                | Exclusion criteria                                                                                                                 |
|---------------------------------------------------|------------------------------------------------------------------------------------------------------------------------------------|
| Eligible women will be expectant mothers who are: | <ul style="list-style-type: none"> <li>Does not comprehend the recruitment invitation (not proficient in English and/or</li> </ul> |

6



|                                                                                                                                                                                                                                                                                                                                                                                                                                                                                                                                  |                                                                                                                                                                                                                                                                                                                                                                                                                                                                                                                  |
|----------------------------------------------------------------------------------------------------------------------------------------------------------------------------------------------------------------------------------------------------------------------------------------------------------------------------------------------------------------------------------------------------------------------------------------------------------------------------------------------------------------------------------|------------------------------------------------------------------------------------------------------------------------------------------------------------------------------------------------------------------------------------------------------------------------------------------------------------------------------------------------------------------------------------------------------------------------------------------------------------------------------------------------------------------|
| <ul style="list-style-type: none"> <li>• Attending antenatal clinics linked to the three study sites</li> <li>• Residing in geographical catchment for the respective antenatal clinic</li> <li>• Expectant mother &gt; 20 weeks gestation</li> <li>• 16 years of age or older at enrolment</li> <li>• Newly arrived migrant (&lt; 10 years in Australia) or self-identified refugee (&lt; 10 years in Australia), from a non-English speaking background</li> <li>• Provide a signed and dated informed consent form</li> </ul> | <ul style="list-style-type: none"> <li>• declines the offer of an interpreter in their home language)</li> <li>• Have no mechanism for contact (telephone or email)</li> <li>• Already an active client in other targeted support services</li> <li>• Less than 16 years of age at enrolment</li> <li>• Migrant &gt; 5 years in Australia or self-identified refugee &gt; 10 years in Australia,</li> <li>• From an English speaking background</li> <li>• Not residing in geographical area of study</li> </ul> |
|----------------------------------------------------------------------------------------------------------------------------------------------------------------------------------------------------------------------------------------------------------------------------------------------------------------------------------------------------------------------------------------------------------------------------------------------------------------------------------------------------------------------------------|------------------------------------------------------------------------------------------------------------------------------------------------------------------------------------------------------------------------------------------------------------------------------------------------------------------------------------------------------------------------------------------------------------------------------------------------------------------------------------------------------------------|

Using three processes, midwives and CCWs (where available) will identify eligible women attending antenatal services at the intervention sites during regular consultations. The processes include: midwives and CCW introduce the project to women attending a group model of antenatal care; midwives will promote the study during individual hospital antenatal visits and provide potential participants a flyer; and midwives will identify potential participants who meet the eligibility criteria and provide study details during regular antenatal visits. If potential participants provide verbal consent, they will be introduced to the project officer. The project officer will explain the study and provide a participant information sheet and consent form (PISCF) using translated documents and/or interpreter services, if required. They will confirm eligibility at face-to-face clinic visits or via telephone consultation. If the woman is not interested in the study, there will be no further contact regarding the study.

Participants will provide informed consent via completing paper-based consent forms, via email or verbally via phone or via online electronic signature option using the RedCap database. Participants consenting to the study can opt out of the data linkage component.

For component 2, once the FDCC trial is underway, the project implementation scientist will contact participating CFHNs, NGO staff, and Hub administrative staff via telephone and/or email to invite them to an interview or focus group. Prior to the interviews and focus groups, the implementation researcher will describe the study to participants and its rationale, providing a PISCF, and obtain informed consent. Hub staff and service leaders, including LHD partners and policymakers, will be invited to complete a 32-item online survey at the completion of *Component 1*. The online survey will include a detailed description of the study, rationale, and an opportunity to indicate informed consent

7

1  
2  
3 before survey completion. Hub staff and managers who do not complete the survey will receive a  
4 reminder thrice via email.  
5

## 6 **Study Procedures**

7  
8  
9 This protocol has used the SPIRIT reporting guidelines.<sup>44</sup> Following the identification of potential  
10 participants, project officers will confirm participant eligibility as part of the consent process. This is  
11 a non-randomised study whereby eligible participants will be allocated to a study arm (FDCC  
12 intervention or control group) based on their residential postcode at the time of enrolment (see below).  
13 Participation will be 12 months, including: intervention allocation; intervention delivery (12 months);  
14 and data collection (baseline, 6 months post-partum, 12 month post-partum). In addition to English,  
15 the study materials will be translated in the six most common community languages (Arabic, Bengali,  
16 Simplified Chinese, Korean, Hindi, and Vietnamese).  
17  
18  
19  
20  
21  
22

### 23 *Allocation, Concealment, and Implementation*

24  
25  
26 Women attending antenatal services from the participating hospitals who live in a defined geographic  
27 area (postcode) served by an established CFH Hub in their LHD will be allocated to the FDCC  
28 intervention group. Women attending antenatal services from the participating hospitals but do not live  
29 in the defined geographic area above will be in the control group.  
30  
31  
32

### 33 *Blinding*

34  
35  
36 Given the nature of the study, blinding to group allocation is impractical. However, as the intervention  
37 is dependent on participant postcode of residence, there is expected to be minimal treatment  
38 contamination between the intervention and control groups. To assess for intervention contamination,  
39 women in all groups will be asked at the 12 months postpartum assessment regarding the use of any  
40 Hub and CFHN service. While the site project officers collecting survey data at each site will not be  
41 blinded to allocation, the researcher analysing data will be blinded to group allocation.  
42  
43  
44  
45

### 46 *Intervention*

47  
48  
49 After recruitment, the Hub navigator will contact participants to introduce Hub services and support  
50 engagement with identified services, if needed. This will be followed by another contact between birth  
51 and 8 weeks postpartum. Following mothers' and infants' discharge from birthing services, women  
52  
53  
54

55  
56  
57  
58  
59  
60  
8

1  
2  
3 will access CFH services via the Hub, as well as psychosocial support services suited to maternal needs  
4 and preferences. Per routine care, all women and their babies will be offered an appointment  
5 (approximately 1 hour) with a CFHN at 1 to 4 weeks postpartum, 6 to 8 weeks postpartum, 6 months  
6 postpartum, and 12 months postpartum.  
7  
8  
9

10 Hub services will be face-to-face, online, and one-to-one. Some services, such as playgroup or  
11 mothers' groups, might be in a group setting. Mothers and their babies will have access to the Hub for  
12 12 months. Further contacts with the Hub navigator or keyworker as participants require.  
13  
14  
15

16 The integrated FDCC Hubs are a physical building and a way of working, facilitating service  
17 collaboration, integration, and a community-led approach to local needs. Hubs most commonly operate  
18 from a host building from which partner community-based or public services are delivered. In our Hub  
19 model, CFH services are co-located with NGOs. Families are linked with psychosocial support  
20 services, including playgroups, early childhood learning opportunities, and family support. Within  
21 the Hub services, existing CFH and NGO services support families to navigate systems and engage  
22 with other health services. These include general practitioners, early childhood, education, and  
23 psychosocial support to address their needs.  
24  
25  
26  
27  
28  
29

### 30 *Control Arm: Routine Care*

31  
32 Pregnant women attending the participating hospitals who meet eligibility criteria but do not live in  
33 the geographic area will be allocated to a control cohort and receive routine care (e.g., receive  
34 information on CFHN services at discharge and follow-up as per current pathways).  
35  
36  
37

### 38 **Implementation Evaluation**

39  
40 Our mixed-methods implementation evaluation will assess the barriers and facilitators to implementing  
41 the FDCC Hubs at the three sites, as guided by the consolidated framework for implementation  
42 research (CFIR).<sup>45</sup> The CFIR is a comprehensive framework designed to 'offer an overarching  
43 typology to promote implementation theory development and verification about what works where  
44 and why across multiple contexts'.<sup>45</sup> The CFIR is widely used in diverse healthcare contexts, including  
45 primary care.<sup>46</sup> The CFIR identifies five major domains and guides the consideration and assessment  
46 of factors that can impact intervention implementation and effectiveness. Additionally, the researchers  
47 will evaluate specific implementation outcomes of acceptability, appropriateness, fidelity to the  
48  
49  
50  
51  
52  
53  
54  
55  
56  
57  
58  
59  
60

implementation strategy, coverage, sustainability, and cost (Table 2) as guided by the taxonomy proposed by Proctor and colleagues.<sup>47</sup>

Table 2: Proctor and colleagues (2011) implementation outcomes mapped to FDCC evaluation

|                 | Questions addressed by each implementation factor                                |
|-----------------|----------------------------------------------------------------------------------|
| Acceptability   | Do Hub staff and families view the Hub model as acceptable?                      |
| Adoption        | Do Hub staff intend to apply the Hub model as described in the study protocol?   |
| Appropriateness | Do Hub staff perceive the Hub model as relevant & useful for their services?     |
| Fidelity        | Is the Hub model applied as intended?                                            |
| Coverage        | How many eligible families are reached through the Hub model and keyworker?      |
| Cost            | How much does it cost to implement Hubs?                                         |
| Sustainability  | What are the factors that will allow the Hubs to be sustained/scaled-up further? |

#### Logic Model

We developed a logic model to inform the FDCC implementation evaluation (**Error! Reference source not found.**). We used a modified version of existing logic model frameworks<sup>48 49</sup> to include the inner context (i.e., individual factors, organisational settings) and the outer context of each site (i.e., area demographics, policy climate, relevant geographically adjacent clinical services). These contextual factors were incorporated within the logic modelling to enable implementation researchers to better describe the determinants of successful implementation in clinical practice.<sup>50</sup>

[INSERT FIGURE 1]

Additionally, we included a detailed description of the intervention to identify feasibility elements to measure during the study. These include features of the physical location of services, how services are integrated, the availability of culturally sensitive support materials and services, and the navigator or keyworker. To supplement the practical elements of the intervention, we described the underlying theoretical principles of the model. These include the collective impact framework<sup>51</sup> and the elements of the behaviour change wheel that we perceived the model to adhere.<sup>52</sup> Collective impact is designed to inform change on complex social issues, and draws on five conditions: common agenda; continuous communication; mutually reinforcing activities; backbone support; and shared measurement.<sup>53</sup> Collective impact and the behavioural change wheel mechanisms of change within the logic model will inform the qualitative interview schedule. Finally, we drew connections from these underlying theories of change to the specific intermediate and long-term outcomes that we hypothesised the model will produce. Principally, we hypothesise that the intervention components will work on the core

10

principles of environmental restructure, enablement, modelling, and training within the Hub sites, underpinned by the collective impact principles to support migrant and refugee parents to engage with health and social support services. This engagement will provide better outcomes for children and families. It will also create opportunities for shared knowledge between health and non-health services, as part of an acceptable and cost-effective model delivery. Table 3 provides an overview of the planned outcomes and measurement for the implementation evaluation.

*Table 3: Overview of the Implementation Evaluation Outcomes*

| <b>Implementation Evaluation Outcomes</b>                                                                                                            |                                                                                    |                                                                                                            |                                                                                                          |
|------------------------------------------------------------------------------------------------------------------------------------------------------|------------------------------------------------------------------------------------|------------------------------------------------------------------------------------------------------------|----------------------------------------------------------------------------------------------------------|
| <b>Outcome measure</b>                                                                                                                               | <b>Data Source</b>                                                                 | <b>Methods</b>                                                                                             | <b>Data Collection</b>                                                                                   |
| Description of local context and Hub                                                                                                                 | SEIFA data, search of grey literature, informal contact with Hub service leaders   | SEIFA data, search of grey literature, informal contact with Hub service leaders                           | Trial commencement                                                                                       |
| Fidelity of Hub Model                                                                                                                                | Hub intervention log                                                               | A bespoke log completed by site project officers                                                           | Ongoing during the trial                                                                                 |
| Acceptability of intervention measure (AIM), intervention appropriateness measure (IAM), and feasibility of intervention measure (FIM) <sup>54</sup> | Research survey administered by project officer                                    | AIM, IAM, and FIM measures completed by Hub staff, service leaders, participants in the intervention group | Trial end (included in the 12-month postpartum parent survey for parents and separate staff survey)      |
| Barriers and facilitators to running the FDCC Hubs                                                                                                   | Interviews with Hub staff, service leaders, participants in the intervention group | Qualitative interviews and focus groups, guided by the CFIR                                                | Pre-trial (with Hub staff and service leaders). Ongoing during and end of the trial for all participants |

|                                                                      |                                                 |                                   |           |
|----------------------------------------------------------------------|-------------------------------------------------|-----------------------------------|-----------|
| The NoMAD tool <sup>55</sup> to assess Hub staff buy in to the model | Research survey administered by project officer | NoMAD tool completed by Hub staff | Trial end |
|----------------------------------------------------------------------|-------------------------------------------------|-----------------------------------|-----------|

## Economic Evaluation

The economic evaluation will explore the costs of Hub implementation, including: the establishment and operation of Hubs; and the flow-on cost from service use from Hub referrals. Hubs are likely to be implemented in different ways relative to local context and, as such, costs might differ. Two bespoke costing templates will be shared with Hub managers upon trial commencement to be completed at 6 and 12 months, with researcher support to ensure accuracy. The templates will allow for standardisation and between-site comparison.

### *Establishment and Operational Costs*

A micro-costing approach will be adopted to account for funded and in-kind expenditures.<sup>56 57</sup> A simple template will have major generic expenditure categories, including upfront capital costs (e.g., vehicles, buildings), governance arrangements to manage the Hubs (e.g., staff meeting time), material costs (e.g., brochures), and in-kind support from staff, including partner agencies. There might be expenditures against these categories. At this stage, there is no plan for capital expenditures. This is included for completeness. Operational costs pertain to daily Hub operation, including new staff hired (e.g., salary, on-costs), in-kind costs (e.g., time costs from non-salaried staff), venue costs (e.g., utilities, even if in-kind), and material costs (e.g., brochures).

### *Referral Costs*

Prior to Hub commencement, Hub personnel will be asked for a list of service partners to create a template where clients will be asked the services accessed and frequency. Table 2 in Appendix 11.5 provides the list collated for SWSLHD; clients will be surveyed using this. Other sites will follow suit. Full client recall is not anticipated. However, it is important that the study clarifies the impact on referral services, if possible. A top-down costing estimate will then be made.<sup>56 57</sup> Each partner service will then be contacted to generate an estimate of the average client service cost. Providers typically

adopt an activity-based costing approach in accounting and funding proposals. No specific client data will be accessed. Rather, the researchers will guide service providers to generate average costs, which typically only involves dividing total funding for service(s) by total occasions of service. Researchers will only be privy to the overall average costs. Where costs are unavailable, an approximation will be made if public and research data are available. Otherwise, a list of service counts only will be made and remain un-costed. Table 4 provides an overview of the planned outcomes and measurement for the implementation evaluation.

Table 4: Overview of the Economic Evaluation Outcomes

| <b>Economic Evaluation Outcomes</b>            |                                                 |                                                                                       |                                                                                         |
|------------------------------------------------|-------------------------------------------------|---------------------------------------------------------------------------------------|-----------------------------------------------------------------------------------------|
| <b>Outcome measure</b>                         | <b>Data Source</b>                              | <b>Methods</b>                                                                        | <b>Data Collection</b>                                                                  |
| Mother quality of life (EQ-5D quality of life) | Research survey administered by project officer | Research survey administered by project officer. EQ-5D quality of life questionnaire. | Baseline (antenatal time of enrolment)<br>6 months post-partum<br>12 months post-partum |
| Cost of implementing Hubs                      | Bespoke surveys                                 | Bespoke surveys completed by Hub Staff and Participants in the intervention group     | 6 and 12 months<br>6 and 12 months                                                      |

### Primary and Secondary Outcome Measures

Outcomes will be measured from enrolment (baseline) until and including 12 months post-partum (Table 5). Outcomes will be gathered via: the extraction of routinely collected clinical data from electronic medical records at each site or LHD; surveys administered by a researcher to mothers; and data linkage of participants with administrative datasets (NSW perinatal data collection, NSW emergency department data collection). The primary outcome measure is the proportion of mothers and their respective infant who attend CFH services for early childhood health checks at 1 to 4 weeks postpartum, 6-8 weeks postpartum, 6 months postpartum, and 12 months postpartum. For primary and secondary variables, see Table 5.

Table 5: Overview of the FDCC Study Outcome Variables

| <b>FDCC trial</b>                                                                                                                                 |                                  |                                                                                                                                                                                                                                                                                                                      |                                                                                                                                                                                               |
|---------------------------------------------------------------------------------------------------------------------------------------------------|----------------------------------|----------------------------------------------------------------------------------------------------------------------------------------------------------------------------------------------------------------------------------------------------------------------------------------------------------------------|-----------------------------------------------------------------------------------------------------------------------------------------------------------------------------------------------|
| <b>Outcome measure</b>                                                                                                                            | <b>Data Source</b>               | <b>Methods</b>                                                                                                                                                                                                                                                                                                       | <b>Data Collection</b>                                                                                                                                                                        |
| Proportion of mothers and their respective infant who attend CFH services for early childhood health checks ( <i>Primary Outcome</i> )            | Electronic medical record at LHD | Extraction of routine clinical data from electronic medical record at LHD.                                                                                                                                                                                                                                           | <ul style="list-style-type: none"> <li>• 1-4 weeks post-partum</li> <li>• 6-8 weeks post-partum</li> <li>• 6 months post-partum</li> <li>• 12 months post-partum</li> </ul>                   |
| Infant identified as at developmental risk by CFHN using the Learnt the Signs Act Early (LtSAE) and Ages and Stages Questionnaire Screening tools | Electronic medical record at LHD | Extraction of routine clinical data from electronic medical record at LHD. <ul style="list-style-type: none"> <li>• LtSAE screening completed, and the concerns/no concerns identified on LtSAE screening domains.</li> <li>• Ages and Stages Questionnaire (ASQ &amp; ASQ-SE) given to families by CFHN.</li> </ul> | <ul style="list-style-type: none"> <li>• 6-8 weeks post-partum (LtSAE)</li> <li>• 6 months post-partum (LtSAE and ASQ)</li> <li>• 12 months post-partum (LtSAE and ASQ and ASQ-SE)</li> </ul> |
| Proportion of children monitored for growth parameters and their growth parameters (weight, height, head circumference)                           | Electronic medical record at LHD | Extraction of routine clinical data from electronic medical. <ul style="list-style-type: none"> <li>• height (cm)</li> <li>• weight (kg)</li> <li>• head circumference (cm)</li> </ul>                                                                                                                               | <ul style="list-style-type: none"> <li>• 1-4 weeks post-partum</li> <li>• 6-8 weeks post-partum</li> <li>• 6 months post-partum</li> <li>• 12 months post-partum</li> </ul>                   |
| Mother identified as at-risk of experiencing depression (Edinburgh Postnatal Depression Scale (EPDS)) <sup>58</sup>                               | Electronic medical record at LHD | Extraction of routine clinical data from electronic medical. <ul style="list-style-type: none"> <li>• Edinburgh Depression Scale (EPDS) total score</li> <li>• Response to item 10 of EDS</li> </ul>                                                                                                                 | <ul style="list-style-type: none"> <li>• Baseline (antenatal time of enrolment)</li> <li>• 1-4 weeks post-partum or by 6-8 weeks post-partum</li> <li>• 6 months post-partum</li> </ul>       |



|                                                                                                                                                                       |                                                                                           |                                                                                                                                                                                                                                                     |                                                                                                                                                                                                                                                                                                                                                   |
|-----------------------------------------------------------------------------------------------------------------------------------------------------------------------|-------------------------------------------------------------------------------------------|-----------------------------------------------------------------------------------------------------------------------------------------------------------------------------------------------------------------------------------------------------|---------------------------------------------------------------------------------------------------------------------------------------------------------------------------------------------------------------------------------------------------------------------------------------------------------------------------------------------------|
| <p>Mother identified as experiencing psychosocial vulnerability/risk factors (Safe Start Psychosocial assessment including Domestic Violence screen)<sup>59</sup></p> | <p>Electronic medical record at LHD.</p>                                                  | <p>Extraction of routine clinical data from electronic medical.</p> <ul style="list-style-type: none"> <li>• Presence/absence of psychosocial risk factors on Safe Start Psychosocial assessment including the Domestic Violence screen.</li> </ul> | <ul style="list-style-type: none"> <li>• Baseline (antenatal time of enrolment)</li> <li>• 1-4 weeks post-partum or by 6-8 weeks post-partum</li> <li>• 6 months post-partum</li> </ul>                                                                                                                                                           |
| <p>Mother experiencing unmet social need/s (THRIVE We Care questionnaire)<sup>60</sup></p>                                                                            | <p>Research survey administered by project officer</p>                                    | <p>Research survey administered by project officer. THRIVE We Care questionnaire.</p>                                                                                                                                                               | <ul style="list-style-type: none"> <li>• Baseline (antenatal time of enrolment)</li> <li>• 6 months post-partum</li> <li>• 12 months post-partum</li> </ul>                                                                                                                                                                                       |
| <p>Mother exclusively breastfeeding /partially breastfeeding/ artificially feeding</p>                                                                                | <p>Electronic medical record at LHD. Data linkage with NSW Perinatal Data Collection.</p> | <p>Extraction of routine clinical data from electronic medical.</p> <ul style="list-style-type: none"> <li>• Exclusively breastfed</li> <li>• Predominately breastfed</li> <li>• Partial breastfed</li> <li>• Artificial feeding</li> </ul>         | <p>Electronic medical record at LHD:</p> <ul style="list-style-type: none"> <li>• 1-4 weeks post-partum</li> <li>• 6-8 weeks post-partum</li> <li>• 6 months post-partum</li> </ul> <p>Data linkage with NSW Perinatal Data Collection</p> <ul style="list-style-type: none"> <li>• Breast feeding initiated at discharge postnatally.</li> </ul> |
| <p>Mother and infant attendance at emergency departments from recruitment to 12 months post-partum.</p>                                                               | <p>Data linkage with NSW-wide Emergency Department Data Collection (EDDC)</p>             | <p>NSW-wide EDDC data Linkage</p>                                                                                                                                                                                                                   | <p>Between baseline and 12 months post-partum</p>                                                                                                                                                                                                                                                                                                 |

## Data Analysis Plan

### *Sample Size Estimation*

Based on pilot data, we anticipate the percentage of children to have their CFH check done by a CFHN will be 60% in the intervention group and 30% in the control group. Therefore, 72 children will be needed for each arm to provide 80% of power to detect the magnitude of such an increase with a  $p$  value  $<0.05$ . Allowing for a 40% attrition rate (i.e., loss-to-follow-up) as this is a vulnerable community<sup>15</sup>, we aim to recruit 120 children in each arm or 240 children in total across the three sites.

### *Statistical Analysis*

Statistical analysis will include descriptive analysis of participating mother and child outcomes at each assessment. We will compare outcomes between the intervention and control groups using the Fisher's test for binary outcomes, Chi-square method for categorical outcomes, non-parametric method (e.g., Wilcoxon rank-sum test) and parametric methods (e.g.,  $t$ -test) for continuous and ordinal variables. As outcomes will be measured repeatedly, multilevel regression analysis will be undertaken to examine intervention impact on outcomes, controlling for the plausible confounders at the individual (e.g., mother's sociodemographic characteristics, geographic area of residence) and community levels at baseline (e.g., neighbourhood socioeconomic factors). Generalised estimating equations method will be used in the regression analysis, considering the potential clustering effect by site. Only deidentified data will be analysed. No data safety monitoring committee is needed for this study due to the known minimal risks. No interim analyses or stopping rules will be applied.

### *Implementation Evaluation Analysis*

Implementation effectiveness will be evaluated using the validated scoring system of  $-2$  to  $+2$  with score descriptions as follows:  $-2$  indicates the construct has negatively influenced the practice and examples of negative manifestations are indicated;  $-1$  indicates the construct has negatively influenced the practice and general statements of negative manifestations are made;  $0$  indicates the construct neutrally influenced the practice;  $+1$  indicates the construct positively influenced the practice and general statements of positive manifestations are made; and  $+2$  indicates the construct positively

1  
2  
3 influenced the practice and explicit examples of positive manifestations are described.<sup>61</sup> Using these  
4 scores, construct scores can range from a low of -80 to a high of +80, demonstrating the key barriers  
5 and facilitators to uptake and sustain the FDCC hubs. This method of quantifying implementation  
6 effectiveness will be supplemented with an inductive analysis of qualitative data to ensure openness  
7 to emerging themes not readily captured by the CFIR and Proctor and colleague's outcome measures.<sup>47</sup>  
8  
9

### 10 11 12 *Economic Analysis*

13  
14 We will first assess comparative costs and outcomes between the Hubs. Second, we will estimate the  
15 overall cost of Hubs and likely costs and affordability, if Hubs was scaled-up across NSW. The latter  
16 will involve estimating the potential Hubs would be made and an average cost (of the three Hubs)  
17 applied, with high and low estimates in a sensitivity analysis.  
18  
19

### 20 21 22 **Data Management**

23  
24 All participants will be allocated a randomly generated unique identifier code to be used throughout  
25 the study. Project officers will have identified information of the participants enrolled at their site,  
26 stored in password protected files. The project officer within each LHD will work with data managers  
27 to extract routinely collected clinical data from electronic medical records for all participants, per Table  
28 3. Data will be stored within a protected site-based server. Only deidentified data will be transferred  
29 from each LHD to the researchers (SW, KO, NH) for data analysis, using encrypted transfer.  
30  
31

32  
33 Project officers with support from CCWs and/or interpreters will collect surveys at baseline, 6 months  
34 postpartum, and 12 months postpartum. The survey can be completed in hardcopy (face-to-face or  
35 telephone) or online by participants using a secure link to REDCap®. Subsequently, project officers  
36 who can access the identifying information within each LHD will enter survey data into the REDCap®  
37 database. REDCap® is hosted on the University of NSW (UNSW) infrastructure. Permissions granted  
38 to each user within each REDCap® project is controlled by and is the responsibility of the project  
39 team. Hardcopy materials will be stored in locked cabinets for the required period, either indefinitely  
40 if the participant consents to providing their data for data pooling or for 15 years after the completion  
41 of the study. After these periods, hardcopy materials will be destroyed and password-protected  
42 electronic archives will be deleted.  
43  
44

45  
46 The identifying information collected within each LHD will be compiled into a single password-  
47  
48  
49  
50  
51  
52  
53  
54  
55  
56  
57  
58  
59  
60

1  
2  
3 protected file and sent to The Centre for Health Record Linkage (CHeReL) for data linkage. The  
4 minimum identifying information for mothers and infants will be used to extract participant records  
5 from the administrative data. Upon completion of data extraction, CHeReL will transfer to UNSW  
6 administrative data of the participants who consented to data linkage. The administrative records will  
7 be deidentified by CHeReL, which will create the person project number (PPN) for each participant.  
8 The PPN will be linked to the participant's unique project identification number to link the  
9 administrative records with the electronic medical record (eMR) and survey records that belong to the  
10 same participant.  
11  
12  
13  
14  
15  
16  
17

## 18 ETHICS AND DISSEMINATION

19  
20 Ethical approval was granted by the South Eastern Sydney LHD (SESLHD) (2020/ETH03295). This  
21 trial was registered with the Australian New Zealand Clinical Trials (ACTRN12621001088831).  
22  
23

### 24 **Confidentiality**

25  
26 The researchers acknowledge that ensuring confidentiality is essential. The researchers will exercise  
27 due diligence to anonymise participants' responses for reporting, publication, and presentation  
28 purposes. Only deidentified data will be transferred from each LHD to the UNSW researchers for data  
29 analysis. The deidentified data from each LHD to the UNSW team will be securely transferred through  
30 a NSW Health-approved e-health platform.  
31  
32  
33  
34

### 35 **Managing Potential Harms**

36  
37 If issues are disclosed outside of the study parameters, mandatory NSW Health policy directives will  
38 apply (e.g., family and domestic violence, child protection matters). These will be managed as per  
39 current policies and practices within LHDs. The child protection and domestic violence counselling  
40 teams are readily accessible to provide advice and support if issues are identified. As the researchers  
41 are all mandatory reporters, they will inform participants that they are not able to maintain  
42 confidentiality when it relates to the safety of the participant, the child/ren, the family, and the wider  
43 community. These obligations are detailed in the PISCF.  
44  
45  
46  
47  
48  
49

### 50 **Patient and Public Involvement**

51  
52 The research questions were developed based on qualitative research undertaken with Hub participants  
53  
54  
55  
56  
57  
58  
59  
60

1  
2  
3 and community members and service providers in the pilot study.<sup>40 62</sup> The FDCC team have a consumer  
4 representative and consultation was undertaken with local Hub partner services. The researchers also  
5 consulted multicultural health services, including cultural support workers, to ensure research  
6 materials are culturally nuanced. Patients or participants have not directly been involved in the current  
7 study design.  
8  
9  
10  
11

## 12 **Dissemination**

13  
14 Data obtained for the study will be published in reports, peer reviewed journals and presented at  
15 appropriate conferences. The de-identified data will be available to all investigators. Access by  
16 individuals' other than the named investigators will only be permitted after consideration and  
17 agreement by all the remaining investigators. An essential element of knowledge translation are the  
18 study partners and advisors who will share findings and consider if and how to progress to trialling or  
19 implementing the program at scale. We intend to produce at least two papers (e.g. protocol, main  
20 findings) for peer-review publication, written by core research and implementation team.  
21  
22  
23  
24  
25  
26

## 27 **Study governance**

28  
29 The FDCC Team will support planning, implementation and governance of the project and ensure that  
30 WH&S requirements and policies are considered and actioned. There are currently no procedures for  
31 auditing trial conduct. All protocol modifications will be discussed within all levels of governance and  
32 communicated to the SESLHD HREC. Figure 2 outlines our governance structure.  
33  
34  
35

36  
37 [INSERT FIGURE 2]  
38  
39

## 40 **Author contributions**

41  
42 The original trial design was conceived by SW and TR. All authors contributed to refinement of, and  
43 approved, the final manuscript.  
44  
45

## 46 **Funding statement**

47  
48 The study is funded through a 3-year NSW Health Translational Research Grants Scheme.  
49  
50  
51  
52  
53

## Competing interests

The views expressed are those of the author(s) and not necessarily those of the funding partners. NSW Health has no direct role in study design; data collection, analysis, and interpretation, or writing of final reports, presentations, or publications.

## Acknowledgements

This protocol has been authored on behalf of the FDCC Collaborative Group. The authors would like to acknowledge the members of the group not listed as authors: Melissa Green, John Eastwood, Karen Sorensen, Kim Lyle, Catherine Jones, Vicki Blight, Amit Arora, Michelle de Vroome, Andrew Hayen, Nick Hopwood, Virginia Schmied, Rebekah Grace, Jane Kohlhoff, Fiona Brooks, Cathy Kaplun, Kathleen Baird, Myna Hua, Lisa Woodland, Ben Harris-Roxas, Brendan Goodger, Tracey Szanto, Karen Zwi, and Grainne O'Loughlin.

## REFERENCES

1. AEDC. Australian Early Development Census. <https://www.aedc.gov.au/data/data-explorer?id=135216>. 2020
2. COAG. COAG Health Council 2019 The Australian National Breastfeeding Strategy: 2019 and Beyond was prepared under the auspices of the COAG Health Council. 2019
3. Moore T, Arefadib N, Deery A, et al. The first thousand days: an evidence paper. *Melbourne: Murdoch Children's Research Institute* 2017
4. Goldfeld S, D'Abaco E, Bryson H, et al. Surveying social adversity in pregnancy: The antenatal risk burden experienced by Australian women. *Journal of paediatrics and child health* 2018;54(7):754-60.
5. NSW Health. The First 2000 Days Framework. 2019
6. Goldfeld S, O'Connor M, Chong S, et al. The impact of multidimensional disadvantage over childhood on developmental outcomes in Australia. *International Journal of Epidemiology* doi:<https://doi.org/10.1093/ije/dyy087>
7. Woolfenden S, Asher I, Bauert P, et al. Summary of position statement on inequities in child health. 2018;54(8):832-33.
8. Rogers HJ, Hogan L, Coates D, et al. Responding to the health needs of women from migrant and refugee backgrounds—Models of maternity and postpartum care in high-income countries: A systematic scoping review. *Health & Social Care in the Community* 2020
9. Hiscock H, Danchin MH, Efron D, et al. Trends in paediatric practice in Australia: 2008 and 2013 national audits from the Australian Paediatric Research Network. *Journal of paediatrics and child health* 2017;53(1):55-61.
10. Palfrey JS, Tonniges TF, Green M, et al. Introduction: addressing the millennial morbidity—the context of community pediatrics. *Pediatrics* 2005;115(Supplement 3):1121-23.

20

11. Woolfenden S, Galea C, Smithers-Sheedy H, et al. Impact of social disadvantage on cerebral palsy severity. *Developmental Medicine & Child Neurology* 2019;61(5):586-92.
12. Brinkman S, Gregory T, Harris J, et al. Associations between the early development instrument at age 5, and reading and numeracy skills at ages 8, 10 and 12: a prospective linked data study. *Child Indicators Research* 2013;6(4):695-708.
13. Merrick MT, Ford DC, Ports KA, et al. Vital signs: Estimated proportion of adult health problems attributable to adverse childhood experiences and implications for prevention—25 States, 2015–2017. *Morbidity and Mortality Weekly Report* 2019;68(44):999.
14. Kezelman C, Hossack N, Stavropoulos P, et al. The cost of unresolved childhood trauma and abuse in adults in Australia, Adults Surviving Child Abuse and Pegasus Economics, Sydney. 2015
15. Woolfenden S, Eapen V, Jalaludin B, et al. Prevalence and factors associated with parental concerns about development detected by the Parents' Evaluation of Developmental Status (PEDS) at 6-month, 12-month and 18-month well-child checks in a birth cohort. *BMJ open* 2016;6(9):e012144.
16. Ayer C, Eapen V, Overs B, et al. Risk factors for non-participation in a universal developmental surveillance program in a population in Australia. *Australian Health Review*
17. Eapen V, Walter A, Guan J, et al. Maternal help-seeking for child developmental concerns: Associations with socio-demographic factors. *J Paediatr Child Health* 2017;53(10):963-69. doi: 10.1111/jpc.13607 [published Online First: 2017/07/01]
18. Zwi K, Rungan S, Woolfenden S, et al. Refugee children and their health, development and well-being over the first year of settlement: A longitudinal study. *Journal of paediatrics and child health* 2017;53(9):841-49.
19. NSW Health. NSW Child Health Survey 2009-2010 Summary report. 2010
20. McLean K, Goldfeld S, Molloy C, et al. Screening and surveillance in early childhood health: rapid review of evidence for effectiveness and efficiency of models. *Ultimo, NSW, Australia: The Sax Institute* 2014
21. Garg P, Ha MT, Eastwood J, et al. Explaining culturally and linguistically diverse (CALD) parents' access of healthcare services for developmental surveillance and anticipatory guidance: qualitative findings from the 'Watch Me Grow' study. *BMC health services research* 2017;17(1):228.
22. Almeida LM, Caldas J, Ayres-de-Campos D, et al. Maternal healthcare in migrants: a systematic review. *Matern Child Health J* 2013;17(8):1346-54. doi: <https://dx.doi.org/10.1007/s10995-012-1149-x> [published Online First: 2013/01/22]
23. Fellmeth G, Fazel M, Plugge E. Migration and perinatal mental health in women from low- and middle-income countries: a systematic review and meta-analysis. *BJOG* 2017;124(5):742-52. doi: <https://doi.org/10.1111/1471-0528.14184> [published Online First: 2016/06/21]
24. World Health Organization (WHO). Promoting the health of refugees and migrants: Framework of priorities and guiding principles to promote the health of refugees and migrants. Geneva: WHO Secretariat, 2017:1-4.
25. Higginbottom G, Morgan M, Alexandre M, et al. Immigrant women's experiences of maternity-care services in Canada: a systematic review using a narrative synthesis. *Syst Rev* 2015;4(13):13. doi: <https://doi.org/10.1186/2046-4053-4-13> [published Online First: 2015/07/19]
26. Correa-Velez I, Ryan J. Developing a best practice model of refugee maternity care. *Women Birth*

21

- 2012;25(1):13-22. doi: <https://dx.doi.org/10.1016/j.wombi.2011.01.002> [published Online First: 2011/02/15]
27. Henderson S, Kendall E. Culturally and linguistically diverse peoples' knowledge of accessibility and utilisation of health services: exploring the need for improvement in health service delivery. *Aust J Prim Health* 2011;17(2):195-201. doi: <https://doi.org/10.1071/PY10065> [published Online First: 2011/06/08]
28. Heslehurst N, Brown H, Pemu A, et al. Perinatal health outcomes and care among asylum seekers and refugees: a systematic review of systematic reviews. *BMC Medicine* 2018;16(1) doi: <https://doi.org/10.1186/s12916-018-1064-0> [published Online First: 2018/06/13]
29. Boyle JA, Willey S, Abbasova G. Supporting better outcomes for migrant and refugee women. *O&G Magazine* 2018; 20(1). <https://www.ogmagazine.org.au/20/1-20/better-outcomes-migrant-refugee-women/>.
30. Small R, Roth C, Raval M, et al. Immigrant and non-immigrant women's experiences of maternity care: a systematic and comparative review of studies in five countries. *BMC Pregnancy Childbirth* 2014;14(152):1-17. doi: 10.1186/1471-2393-14-152 [published Online First: 2014/04/30]
31. Woolfenden S, Posada N, Krchnakova R, et al. Equitable access to developmental surveillance and early intervention - understanding the barriers for children from culturally and linguistically diverse (CALD) backgrounds. *Health Expectations* 2015;18(6):3286-301. doi: 10.1111/hex.12318
32. Woolfenden S, Posada N, Krchnakova R, et al. Equitable access to developmental surveillance and early intervention - understanding the barriers for children from culturally and linguistically diverse (CALD) backgrounds. *Health Expect* doi: 101111/hex12318 2014
33. Woolfenden S, Eapen V, Williams K, et al. A systematic review of the prevalence of parental concerns measured by the Parents' Evaluation of Developmental Status (PEDS) indicating developmental risk. *BMC Pediatr* 2014;14
34. Woolfenden S, Galea C, Badland H, et al. Use of health services by preschool-aged children who are developmentally vulnerable and socioeconomically disadvantaged: testing the inverse care law. *J Epidemiol Community Health* 2020;74(6):495-501.
35. Chando S, Craig JC, Burgess L, et al. Developmental risk among Aboriginal children living in urban areas in Australia: the Study of Environment on Aboriginal Resilience and Child Health (SEARCH). *BMC pediatrics* 2020;20(1):1-13.
36. Henry R. Review of health services for children, young people and families within the NSW Health system, 2019.
37. National Academies of Sciences E, Medicine. Integrating Social Care Into the Delivery of Health Care: Moving Upstream to Improve the Nation's Health: Washington, DC: National Academies Press, 2019.
38. Moore T. Using place-based approaches to strengthen child wellbeing. *Developing Practice: The Child, Youth and Family Work Journal* 2014(40):40.
39. Glover J, Samir N, Kaplun C, et al. The effectiveness of place-based interventions in improving development, health and wellbeing outcomes in children aged 0–6 years living in disadvantaged neighbourhoods in high-income countries – A systematic review. *Wellbeing, Space and Society* 2021;2:100064. doi: <https://doi.org/10.1016/j.wss.2021.100064>
40. Edwards K, Rimes T, Smith R, et al. Improving Access to Early Childhood Developmental

22



- 1  
2  
3 Surveillance for Children from Culturally and Linguistically Diverse (CALD) Background. .  
4 *International Journal of Integrated Care* 2020;Apr;20(2)  
5  
6 41. Edwards K, Fernandez R, Rimes T, et al. "Happy, Healthy, Ready – working with early childhood  
7 non-government organisations for developmental surveillance for vulnerable children". .  
8 *Australian Journal of Advanced Nursing* 2020; 37(4)  
9  
10 42. Rogers HJ, Hogan L, Coates D, et al. Cross Cultural Workers for women and families from migrant  
11 and refugee backgrounds: a mixed-methods study of service providers perceptions. *BMC*  
12 *Women's Health* 2021;21(1):222. doi: 10.1186/s12905-021-01368-4  
13  
14 43. Rogers HJ, Hogan L, Coates D, et al.  
15 A Bridge to Health: The Cross Cultural Workers in Maternity and Child and Family Health Service  
16 for women and families from migrant and refugee backgrounds: A mixed-methods study of  
17 service providers perceptions in Sydney, Australia (Manuscript not yet published). 2020  
18  
19 44. Chan A-W, Tetzlaff JM, Gøtzsche PC, et al. SPIRIT 2013 explanation and elaboration: guidance  
20 for protocols of clinical trials. *Bmj* 2013;346  
21  
22 45. Damschroder LJ, Aron DC, Keith RE, et al. Fostering implementation of health services research  
23 findings into practice: a consolidated framework for advancing implementation science.  
24 *Implement Science* 2009;4(1):50.  
25  
26 46. Kirk MA, Kelley C, Yankey N, et al. A systematic review of the use of the consolidated framework  
27 for implementation research. *Implementation Science* 2016;11(72):1-13.  
28  
29 47. Proctor E, Silmere H, Raghavan R, et al. Outcomes for implementation research: conceptual  
30 distinctions, measurement challenges, and research agenda. *Administration and Policy in*  
31 *Mental Health and Mental Health Services Research* 2011;38(2):65-76.  
32  
33 48. Lawton B, Brandon PR, Cicchinelli L, et al. Logic Models: A Tool for Designing and Monitoring  
34 Program Evaluations. REL 2014-007. *Regional Educational Laboratory Pacific* 2014  
35  
36 49. U.S. Department of Health and Human Services Centres for Disease Control and Prevention.  
37 Introduction to program evaluation for public health programs: A self-study guide. Atlanta,  
38 GA: Centers for Disease Control and Prevention, 2011.  
39  
40 50. Li S-A, Jeffs L, Barwick M, et al. Organizational contextual features that influence the  
41 implementation of evidence-based practices across healthcare settings: a systematic integrative  
42 review. *Systematic Reviews* 2018;7(1):72. doi: 10.1186/s13643-018-0734-5  
43  
44 51. Kania J, Kramer M. Collective impact: Leland Stanford Jr. University 2011.  
45  
46 52. Michie S, Atkins L, West R. The behaviour change wheel. *A guide to designing interventions 1st*  
47 *ed Great Britain: Silverback Publishing* 2014:1003-10.  
48  
49 53. Smart JR. Collective impact: Evidence and implications for practice: Australian Institute of Family  
50 Studies Melbourne 2017.  
51  
52 54. Weiner BJ, Lewis CC, Stanick C, et al. Psychometric assessment of three newly developed  
53 implementation outcome measures. *Implementation Science* 2017;12(1):108.  
54  
55 55. Finch TL, Rapley T, Girling M, et al. Improving the normalization of complex interventions:  
56 measure development based on normalization process theory (NoMAD): study protocol.  
57 *Implementation Science* 2013;8(1):43. doi: 10.1186/1748-5908-8-43  
58  
59 56. Chapko MK, Liu CF, Perkins M, et al. Equivalence of two healthcare costing methods: bottom-up  
60 and top-down. *Health economics* 2009;18(10):1188-201.  
57  
58  
59  
60  
61  
62  
63  
64  
65  
66  
67  
68  
69  
70  
71  
72  
73  
74  
75  
76  
77  
78  
79  
80  
81  
82  
83  
84  
85  
86  
87  
88  
89  
90  
91  
92  
93  
94  
95  
96  
97  
98  
99  
100  
101  
102  
103  
104  
105  
106  
107  
108  
109  
110  
111  
112  
113  
114  
115  
116  
117  
118  
119  
120  
121  
122  
123  
124  
125  
126  
127  
128  
129  
130  
131  
132  
133  
134  
135  
136  
137  
138  
139  
140  
141  
142  
143  
144  
145  
146  
147  
148  
149  
150  
151  
152  
153  
154  
155  
156  
157  
158  
159  
160  
161  
162  
163  
164  
165  
166  
167  
168  
169  
170  
171  
172  
173  
174  
175  
176  
177  
178  
179  
180  
181  
182  
183  
184  
185  
186  
187  
188  
189  
190  
191  
192  
193  
194  
195  
196  
197  
198  
199  
200  
201  
202  
203  
204  
205  
206  
207  
208  
209  
210  
211  
212  
213  
214  
215  
216  
217  
218  
219  
220  
221  
222  
223  
224  
225  
226  
227  
228  
229  
230  
231  
232  
233  
234  
235  
236  
237  
238  
239  
240  
241  
242  
243  
244  
245  
246  
247  
248  
249  
250  
251  
252  
253  
254  
255  
256  
257  
258  
259  
260  
261  
262  
263  
264  
265  
266  
267  
268  
269  
270  
271  
272  
273  
274  
275  
276  
277  
278  
279  
280  
281  
282  
283  
284  
285  
286  
287  
288  
289  
290  
291  
292  
293  
294  
295  
296  
297  
298  
299  
300  
301  
302  
303  
304  
305  
306  
307  
308  
309  
310  
311  
312  
313  
314  
315  
316  
317  
318  
319  
320  
321  
322  
323  
324  
325  
326  
327  
328  
329  
330  
331  
332  
333  
334  
335  
336  
337  
338  
339  
340  
341  
342  
343  
344  
345  
346  
347  
348  
349  
350  
351  
352  
353  
354  
355  
356  
357  
358  
359  
360  
361  
362  
363  
364  
365  
366  
367  
368  
369  
370  
371  
372  
373  
374  
375  
376  
377  
378  
379  
380  
381  
382  
383  
384  
385  
386  
387  
388  
389  
390  
391  
392  
393  
394  
395  
396  
397  
398  
399  
400  
401  
402  
403  
404  
405  
406  
407  
408  
409  
410  
411  
412  
413  
414  
415  
416  
417  
418  
419  
420  
421  
422  
423  
424  
425  
426  
427  
428  
429  
430  
431  
432  
433  
434  
435  
436  
437  
438  
439  
440  
441  
442  
443  
444  
445  
446  
447  
448  
449  
450  
451  
452  
453  
454  
455  
456  
457  
458  
459  
460  
461  
462  
463  
464  
465  
466  
467  
468  
469  
470  
471  
472  
473  
474  
475  
476  
477  
478  
479  
480  
481  
482  
483  
484  
485  
486  
487  
488  
489  
490  
491  
492  
493  
494  
495  
496  
497  
498  
499  
500  
501  
502  
503  
504  
505  
506  
507  
508  
509  
510  
511  
512  
513  
514  
515  
516  
517  
518  
519  
520  
521  
522  
523  
524  
525  
526  
527  
528  
529  
530  
531  
532  
533  
534  
535  
536  
537  
538  
539  
540  
541  
542  
543  
544  
545  
546  
547  
548  
549  
550  
551  
552  
553  
554  
555  
556  
557  
558  
559  
560  
561  
562  
563  
564  
565  
566  
567  
568  
569  
570  
571  
572  
573  
574  
575  
576  
577  
578  
579  
580  
581  
582  
583  
584  
585  
586  
587  
588  
589  
590  
591  
592  
593  
594  
595  
596  
597  
598  
599  
600  
601  
602  
603  
604  
605  
606  
607  
608  
609  
610  
611  
612  
613  
614  
615  
616  
617  
618  
619  
620  
621  
622  
623  
624  
625  
626  
627  
628  
629  
630  
631  
632  
633  
634  
635  
636  
637  
638  
639  
640  
641  
642  
643  
644  
645  
646  
647  
648  
649  
650  
651  
652  
653  
654  
655  
656  
657  
658  
659  
660  
661  
662  
663  
664  
665  
666  
667  
668  
669  
670  
671  
672  
673  
674  
675  
676  
677  
678  
679  
680  
681  
682  
683  
684  
685  
686  
687  
688  
689  
690  
691  
692  
693  
694  
695  
696  
697  
698  
699  
700  
701  
702  
703  
704  
705  
706  
707  
708  
709  
710  
711  
712  
713  
714  
715  
716  
717  
718  
719  
720  
721  
722  
723  
724  
725  
726  
727  
728  
729  
730  
731  
732  
733  
734  
735  
736  
737  
738  
739  
740  
741  
742  
743  
744  
745  
746  
747  
748  
749  
750  
751  
752  
753  
754  
755  
756  
757  
758  
759  
760  
761  
762  
763  
764  
765  
766  
767  
768  
769  
770  
771  
772  
773  
774  
775  
776  
777  
778  
779  
780  
781  
782  
783  
784  
785  
786  
787  
788  
789  
790  
791  
792  
793  
794  
795  
796  
797  
798  
799  
800  
801  
802  
803  
804  
805  
806  
807  
808  
809  
810  
811  
812  
813  
814  
815  
816  
817  
818  
819  
820  
821  
822  
823  
824  
825  
826  
827  
828  
829  
830  
831  
832  
833  
834  
835  
836  
837  
838  
839  
840  
841  
842  
843  
844  
845  
846  
847  
848  
849  
850  
851  
852  
853  
854  
855  
856  
857  
858  
859  
860  
861  
862  
863  
864  
865  
866  
867  
868  
869  
870  
871  
872  
873  
874  
875  
876  
877  
878  
879  
880  
881  
882  
883  
884  
885  
886  
887  
888  
889  
890  
891  
892  
893  
894  
895  
896  
897  
898  
899  
900  
901  
902  
903  
904  
905  
906  
907  
908  
909  
910  
911  
912  
913  
914  
915  
916  
917  
918  
919  
920  
921  
922  
923  
924  
925  
926  
927  
928  
929  
930  
931  
932  
933  
934  
935  
936  
937  
938  
939  
940  
941  
942  
943  
944  
945  
946  
947  
948  
949  
950  
951  
952  
953  
954  
955  
956  
957  
958  
959  
960  
961  
962  
963  
964  
965  
966  
967  
968  
969  
970  
971  
972  
973  
974  
975  
976  
977  
978  
979  
980  
981  
982  
983  
984  
985  
986  
987  
988  
989  
990  
991  
992  
993  
994  
995  
996  
997  
998  
999  
1000

23

programmes: Oxford university press 2015.

58. Cox JL, Holden JM, Sagovsky R. Detection of Postnatal Depression: Development of the 10-item Edinburgh Postnatal Depression Scale. *British Journal of Psychiatry* 1987;150(6):782-86. doi: 10.1192/bjp.150.6.782 [published Online First: 2018/01/02]
59. NSW Department of Health. NSW Health/Families NSW Supporting Families Early Package – SAFE START Strategic Policy, 2009.
60. Garg A, Toy S, Tripodis Y, et al. Addressing Social Determinants of Health at Well Child Care Visits: A Cluster RCT. *Pediatrics* 2015;135(2):e296-e304. doi: 10.1542/peds.2014-2888
61. Damschroder LJ, Lowery JC. Evaluation of a large-scale weight management program using the consolidated framework for implementation research (CFIR). *Implementation Science* 2013;8(51):1-32.
62. Edwards B, Mullan K, Katz I, et al. The Stronger Families in Australia (SFIA) Study: Phase 2 The Stronger Families in Australia (SFIA) Study: Phase 2. 2014

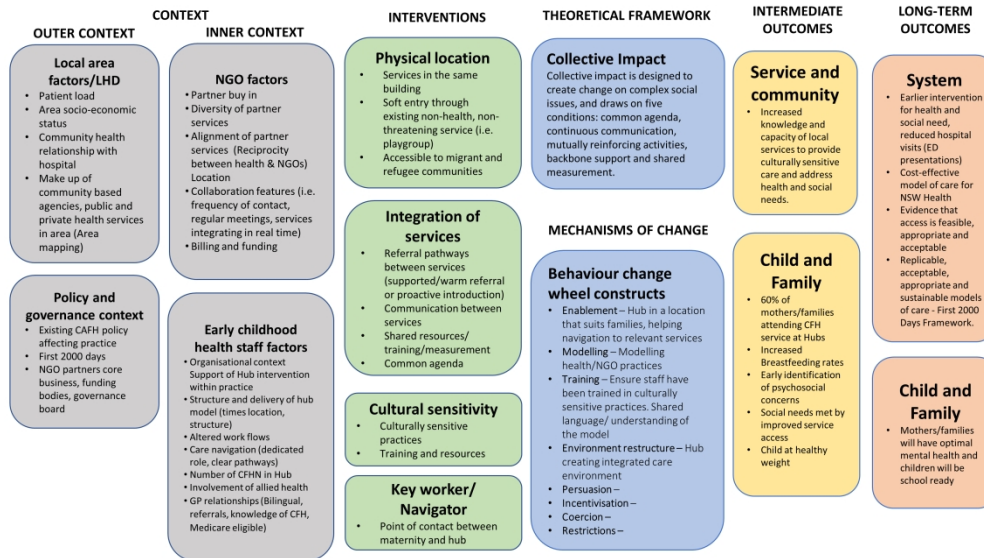

FDCC implementation evaluation logic model

861x484mm (118 x 118 DPI)

1  
2  
3  
4  
5  
6  
7  
8  
9  
10  
11  
12  
13  
14  
15  
16  
17  
18  
19  
20  
21  
22  
23  
24  
25  
26  
27  
28  
29  
30  
31  
32  
33  
34  
35  
36  
37  
38  
39  
40  
41  
42  
43  
44  
45  
46  
47  
48  
49  
50  
51  
52  
53  
54  
55  
56  
57  
58  
59  
60

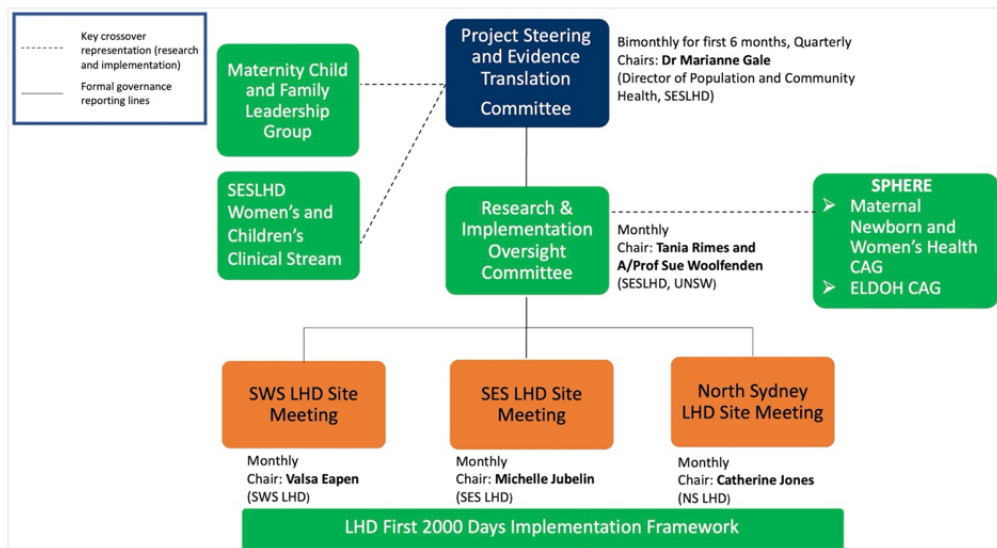

FDCC governance structure

626x342mm (38 x 38 DPI)

## APPENDICES

### Appendix 1: Participant Information Sheet and Consent Form

#### Primary and Community Health Directorate

#### PARTICIPANT INFORMATION SHEET AND CONSENT FORM Participant

#### **Family Care Connect – a holistic first 2000 days model of care for women and families from migrant and refugee communities.**

#### Invitation

You are invited to take part in the Family Care Connect project. Family Care Connect involves child and family Hubs, where health and other agencies work together and you are supported to navigate these services. Our research is seeing whether these Hubs support the health and development of children, mothers and families from migrant and refugee communities.

#### Who is doing the research?

Tania Rimes

Children and Communities Program Coordinator

Primary and Community Health Directorate | South Eastern Sydney Local Health District (SESLHD).

Associate Professor Sue Woolfenden (Research lead)

NHMRC Senior Research Fellow, Population Child Health Group | The University of New South Wales (UNSW). Senior Staff Specialist, Community Child Health | Sydney Children's Hospitals Network.

Before you decide if you want to take part in this research, we would like to explain what we are doing and why we are doing it. . Please take the time to read the following information carefully. You can talk about it with a relative or a friend if you wish before deciding.

#### What is the purpose of this research?

We want to see if child and family Hubs help women and families from migrant and refugee communities move from pregnancy to Child and Family Health services. Also, we want to see if these Hubs support children's health and development in the first 12 months of life.

We will also look at how easy and cost-effective the Hub is for you and other women and families.

#### Why have I been invited to participate in this research?

You are eligible to participate in this research because you:

- are having your baby or recently given birth to your baby at [INSERT HOSPITAL SITES]
- live in the postcode of [INSERT POSTCODE/S]

- are at least 20 weeks pregnant, OR have recently given birth to your baby and have not been discharged home from postnatal ward
- are a newly arrived migrant (within the last 10 years) from a non-English speaking background; or a refugee (living in Australia for less than 10 years) from a non-English speaking background
- are 16 years of age or older.

### If I say yes, what will it involve?

If you decide to take part in the research and live in [INSERT SITE AREA] you will be in the **'FDCC Group'**. You will receive information about the child and family services in your area you can access after the birth of your baby. This information is given to all women, regardless of whether or not they participate in the study.

If you take part in the **"FDCC Group"**, you will also be contacted by a worker from the local child and family Hub who will give you more information on the services offered and assist you with accessing these services if you choose.

If you agree to take part, we will ask you to sign the Participant Information and Consent form below; OR sign the online consent found here [INSERT ONLINE CONSENT URL]; OR provide verbal consent over the telephone to the contact person for the research.

After you provide consent to take part in this research, we will ask you to:

- Complete a survey about you, your family, your support needs, and your wellbeing. This will take about 30 minutes. You can choose to do it online, by paper, over the phone, or in-person. **We can provide an interpreter to assist.**
- Complete another survey when your baby is 6 months and 12 months old. This will ask questions about you, what your needs are, and what services you have used. **We can provide an interpreter to assist.**
- We will also collect data from your local and state-wide hospital/s about you and your baby. This reduces the number of questions we need to ask you.

The data we collect from local hospitals includes:

- Information about you and your child such as country of birth, date of birth, gender, language spoken at home
- Information from routine questions asked to all women when they come to hospital about their health and wellbeing and their child's
- Information about the services you or your child has seen, for example the child and family health nurse.

The data we collect from state-wide hospitals includes:

- Information that is collected on all new mothers and babies in NSW
- Emergency Department presentations for you and your baby

**If you don't want us to collect data about you and your baby from state-wide hospitals, then we won't. Please let us know by checking the box.**

**I DO NOT want my state-wide hospital data included as part of this research**

1  
2  
3  
4 **If you only provide verbal consent, we will not collect data about you and your baby**  
5 **from state-wide hospitals.**

6 As part of this research, we may also invite you to be interviewed. We will contact you at  
7 another time to discuss this process before the research is complete.  
8  
9

10 Any information we collect that can identify you or your child will remain confidential.  
11

12 The total time you are involved with this project will be for 12 to 18 months, but you can  
13 choose to withdraw at any time.  
14

15  
16 **What if I don't want to take part in this research, or if I want to withdraw later?**

17 It is completely up to you whether or not you decide to take part. Saying yes or no will not  
18 affect your relationship with the care you receive, the services you access, or your visa  
19 status now or in the future.  
20

21 If you wish to leave the research once it has started, you can do so verbally or in writing at  
22 any time without giving a reason. However, it may not be possible to withdraw your data  
23 from the research results once we have collected it and removed your identifying details.  
24 This is due to be done from March 2023.  
25

26  
27 **How is this research being paid for?**

28 The research is being paid for by NSW Health as part of the Translational Research Grant  
29 Scheme. More information about this scheme can be found here:

30 <https://www.medicalresearch.nsw.gov.au/translational-research-grants-scheme/>  
31  
32

33 **Are there risks to me in taking part in this research?**

34 There is very little risk to you, however if you become upset or distressed because of taking  
35 part in the research, the research team will arrange for counselling or other help. Any  
36 counselling or help will be provided by qualified staff who are not members of the research  
37 team. This will be provided free of charge.  
38

39 Another risk in taking part in this research is the risk to your privacy as part of collecting  
40 data about you, your child, and your family. While this is a risk, we will take all the steps to  
41 ensure your information remains private and confidential. We do not collect you or your  
42 baby's name, or anything else that could identify you or your family. Instead, your name will  
43 be replaced with a number. Only people involved with this research will be able to tell that  
44 the information is about you.  
45  
46

47  
48 **What happens if I suffer injury or complications as a result of the research?**

49 It is very unlikely that you will suffer any injury as we are only asking you to complete  
50 questionnaires. However, if you require treatment or suffer loss as a result of the  
51 wrongdoing of any of the parties involved in the research, you can seek compensation. The  
52 cost of your treatment must be paid by the compensation you receive.  
53  
54

55 **Will I benefit from the research?**

56 This research aims to determine how best to provide child health services for families and  
57 to improve how parents in the future access child and family health services, however it  
58 may or may not directly benefit you or your baby.  
59  
60

### **Will taking part in this research cost me anything, and will I be paid?**

Taking part in this research will not cost you anything, nor will you be paid.

### **How will my confidentiality be protected?**

Any information that is collected about you as part of this research will remain private and confidential and will be discussed only with your permission, except as required by law. This means the research team are Mandatory Reporters and may need to speak with NSW Department of Communities and Justice if they are told or are concerned that a child is being hurt or is at risk of being hurt e.g. if there is abuse or violence in the home.

If such a situation happens, we would discuss this with you in private and arrange for you to speak with another professional if required.

Only the researchers named above will have access to your details. All information will be stored on a secure drive within [INSERT LHD SITES] and UNSW. We will keep the information for 5 years after the research ends. After this time, it will be destroyed.

In line with Australian, New South Wales, and other relevant laws, you have the right to access and correct the information we collect and store about you. Please contact us if you would like to access the information.

### **What happens with the results?**

If you give us your permission by providing your consent in written form, online, or verbally, we plan to publish the results in a report and in peer reviewed journals. We may also present results at professional forums and conferences to inform better ways of working and providing services.

We will also give a report on the research to the South Eastern Sydney Local Health District Human Research Ethics Committee.

In any report, publication, or presentation, information will be provided in such a way that you or your family cannot be identified.

### **What should I do if I want to discuss this research further before I decide?**

When you have read this information, the researcher interviewer/project officer will discuss it with you and answer any queries you may have. If you would like to know more at any stage, please do not hesitate to contact Tania Rimes, Principal Investigator on (02) 9382 8696 or email her at [tania.rimes@health.nsw.gov.au](mailto:tania.rimes@health.nsw.gov.au). If you need an interpreter, you can contact Tania through the Translating and Interpreting Service (TIS) on 131 450.

### **Who should I contact if I have concerns about the conduct of this research?**

This research has been approved by the South Eastern Sydney Local Health District Human Research Ethics Committee. Any person with concerns or complaints about the conduct of this research should contact the Research Support Office which is nominated to receive complaints from research participants. You should contact them on 02 9382 3587, or email [SESLHD-RSO@health.nsw.gov.au](mailto:SESLHD-RSO@health.nsw.gov.au) and quote HREC reference number: 2020/ETH03295.

The conduct of this research is at the [INSERT SITE NAMES]. Any person with concerns or complaints about the conduct of this research may also contact the [*details of the Research Governance Officer of the health district will be provided following SSA application*]



1  
2  
3  
4 **Thank you for taking the time to consider this research.**  
5 **If you wish to take part in it, please sign the attached consent form.**  
6 **This information sheet is for you to keep.**  
7  
8  
9  
10  
11  
12  
13  
14  
15  
16  
17  
18  
19  
20  
21  
22  
23  
24  
25  
26  
27  
28  
29  
30  
31  
32  
33  
34  
35  
36  
37  
38  
39  
40  
41  
42  
43  
44  
45  
46  
47  
48  
49  
50  
51  
52  
53  
54  
55  
56  
57  
58  
59  
60

For peer review only

1  
2  
3  
4  
5  
6  
7  
8  
9  
10  
11  
12  
13  
14  
15  
16  
17  
18  
19  
20  
21  
22  
23  
24  
25  
26  
27  
28  
29  
30  
31  
32  
33  
34  
35  
36  
37  
38  
39  
40  
41  
42  
43  
44  
45  
46  
47  
48  
49  
50  
51  
52  
53  
54  
55  
56  
57  
58  
59  
60

## Primary and Community Health Directorate

### CONSENT FORM

**Family Care Connect – a holistic first 2000 days model of care for women and families from migrant and refugee communities.**

1. I,.....  
of.....  
agree to take part in the research described in the participant information statement set out above and to have my data linked as outlined in the information sheet.
2. I have read the participant information statement, which explains why I have been asked to take part, the aims of the research and the possible risks of the research, and the statement has been explained to me to my satisfaction.
3. Before signing this consent form, I have been able to ask any questions relating to any possible physical and mental harm I might suffer as a result of taking part and I have received satisfactory answers.
4. I understand that I can withdraw from the research at any time without affecting my relationship with South Eastern Sydney Local Health District or service at the child and family hub.
5. I agree that research information collected from the results of the research may be published and presented, provided that I cannot be identified.
6. I understand that if I have any questions relating to my participation in this research, I may contact Tania Rimes on telephone (02) 9382 8696, who will be happy to answer them. I can call 131450 (TIS) for language support.
7. I have been given a copy of this Consent Form and the Participant Information Statement.

Complaints may be directed to the Research Support Office, South Eastern Sydney Local Health District, Prince of Wales Hospital, Randwick NSW 2031 Australia (phone 02-9382 3587, fax 02-9382 2813, email [SESLHD-RSO@health.nsw.gov.au](mailto:SESLHD-RSO@health.nsw.gov.au)).

**Signature of participant**

**Please PRINT name**

**Date**

\_\_\_\_\_

\_\_\_\_\_

\_\_\_\_\_

**Signature of witness**

**Please PRINT name**

**Date**

\_\_\_\_\_

\_\_\_\_\_

\_\_\_\_\_

1  
2  
3  
4  
5  
6  
7  
8  
9  
10  
11  
12  
13  
14  
15  
16  
17  
18  
19  
20  
21  
22  
23  
24  
25  
26  
27  
28  
29  
30  
31  
32  
33  
34  
35  
36  
37  
38  
39  
40  
41  
42  
43  
44  
45  
46  
47  
48  
49  
50  
51  
52  
53  
54  
55  
56  
57  
58  
59  
60

|                                  |                          |             |
|----------------------------------|--------------------------|-------------|
| <b>Signature of investigator</b> | <b>Please PRINT name</b> | <b>Date</b> |
| _____                            | _____                    | _____       |

Investigator/officer taking consent to complete:

  

Check box if participant DOES NOT want their state-wide hospital data included as part of this research

For peer review only

# Reporting checklist for protocol of a clinical trial.

Based on the SPIRIT guidelines.

## Instructions to authors

Complete this checklist by entering the page numbers from your manuscript where readers will find each of the items listed below.

Your article may not currently address all the items on the checklist. Please modify your text to include the missing information. If you are certain that an item does not apply, please write "n/a" and provide a short explanation.

Upload your completed checklist as an extra file when you submit to a journal.

In your methods section, say that you used the SPIRIT reporting guidelines, and cite them as:

Chan A-W, Tetzlaff JM, Gøtzsche PC, Altman DG, Mann H, Berlin J, Dickersin K, Hróbjartsson A, Schulz KF, Parulekar WR, Krleža-Jerić K, Laupacis A, Moher D. SPIRIT 2013 Explanation and Elaboration: Guidance for protocols of clinical trials. *BMJ*. 2013;346:e7586

|                                   | Reporting Item                                                                                                                  | Page Number |
|-----------------------------------|---------------------------------------------------------------------------------------------------------------------------------|-------------|
| <b>Administrative information</b> |                                                                                                                                 |             |
| Title                             | <a href="#">#1</a> Descriptive title identifying the study design, population, interventions, and, if applicable, trial acronym | 1           |
| Trial registration                | <a href="#">#2a</a> Trial identifier and registry name. If not yet                                                              | 17          |

|    |                     |                                                                         |    |
|----|---------------------|-------------------------------------------------------------------------|----|
| 1  |                     | registered, name of intended registry                                   |    |
| 2  |                     |                                                                         |    |
| 3  |                     |                                                                         |    |
| 4  | Trial registration: | <a href="#">#2b</a> All items from the World Health Organization Trial  |    |
| 5  |                     |                                                                         |    |
| 6  | data set            | Registration Data Set                                                   |    |
| 7  |                     |                                                                         |    |
| 8  |                     |                                                                         |    |
| 9  | Protocol version    | <a href="#">#3</a> Date and version identifier                          | 2  |
| 10 |                     |                                                                         |    |
| 11 |                     |                                                                         |    |
| 12 | Funding             | <a href="#">#4</a> Sources and types of financial, material, and other  | 19 |
| 13 |                     |                                                                         |    |
| 14 |                     | support                                                                 |    |
| 15 |                     |                                                                         |    |
| 16 |                     |                                                                         |    |
| 17 | Roles and           | <a href="#">#5a</a> Names, affiliations, and roles of protocol          | 19 |
| 18 |                     |                                                                         |    |
| 19 | responsibilities:   | contributors                                                            |    |
| 20 |                     |                                                                         |    |
| 21 | contributorship     |                                                                         |    |
| 22 |                     |                                                                         |    |
| 23 |                     |                                                                         |    |
| 24 |                     |                                                                         |    |
| 25 | Roles and           | <a href="#">#5b</a> Name and contact information for the trial sponsor  | 19 |
| 26 |                     |                                                                         |    |
| 27 | responsibilities:   |                                                                         |    |
| 28 |                     |                                                                         |    |
| 29 | sponsor contact     |                                                                         |    |
| 30 |                     |                                                                         |    |
| 31 | information         |                                                                         |    |
| 32 |                     |                                                                         |    |
| 33 |                     |                                                                         |    |
| 34 |                     |                                                                         |    |
| 35 | Roles and           | <a href="#">#5c</a> Role of study sponsor and funders, if any, in study | 19 |
| 36 |                     |                                                                         |    |
| 37 | responsibilities:   | design; collection, management, analysis, and                           |    |
| 38 |                     |                                                                         |    |
| 39 | sponsor and funder  | interpretation of data; writing of the report; and the                  |    |
| 40 |                     |                                                                         |    |
| 41 |                     | decision to submit the report for publication,                          |    |
| 42 |                     |                                                                         |    |
| 43 |                     | including whether they will have ultimate authority                     |    |
| 44 |                     |                                                                         |    |
| 45 |                     | over any of these activities                                            |    |
| 46 |                     |                                                                         |    |
| 47 |                     |                                                                         |    |
| 48 |                     |                                                                         |    |
| 49 | Roles and           | <a href="#">#5d</a> Composition, roles, and responsibilities of the     | 19 |
| 50 |                     |                                                                         |    |
| 51 | responsibilities:   | coordinating centre, steering committee, endpoint                       |    |
| 52 |                     |                                                                         |    |
| 53 | committees          | adjudication committee, data management team,                           |    |
| 54 |                     |                                                                         |    |
| 55 |                     | and other individuals or groups overseeing the                          |    |
| 56 |                     |                                                                         |    |
| 57 |                     |                                                                         |    |
| 58 |                     |                                                                         |    |
| 59 |                     |                                                                         |    |
| 60 |                     |                                                                         |    |

trial, if applicable (see Item 21a for data  
monitoring committee)

## Introduction

|                                                       |                     |                                                                                                                                                                                                                        |     |
|-------------------------------------------------------|---------------------|------------------------------------------------------------------------------------------------------------------------------------------------------------------------------------------------------------------------|-----|
| Background and<br>rationale                           | <a href="#">#6a</a> | Description of research question and justification<br>for undertaking the trial, including summary of<br>relevant studies (published and unpublished)<br>examining benefits and harms for each<br>intervention         | 4   |
| Background and<br>rationale: choice of<br>comparators | <a href="#">#6b</a> | Explanation for choice of comparators                                                                                                                                                                                  | 4   |
| Objectives                                            | <a href="#">#7</a>  | Specific objectives or hypotheses                                                                                                                                                                                      | 5-6 |
| Trial design                                          | <a href="#">#8</a>  | Description of trial design including type of trial<br>(eg, parallel group, crossover, factorial, single<br>group), allocation ratio, and framework (eg,<br>superiority, equivalence, non-inferiority,<br>exploratory) | 7   |
| <b>Methods:</b>                                       |                     |                                                                                                                                                                                                                        |     |
| Participants,<br>interventions, and<br>outcomes       |                     |                                                                                                                                                                                                                        |     |
| Study setting                                         | <a href="#">#9</a>  | Description of study settings (eg, community<br>clinic, academic hospital) and list of countries                                                                                                                       | 6   |

|    |                      |                                                                           |                    |
|----|----------------------|---------------------------------------------------------------------------|--------------------|
| 1  |                      | where data will be collected. Reference to where                          |                    |
| 2  |                      |                                                                           |                    |
| 3  |                      | list of study sites can be obtained                                       |                    |
| 4  |                      |                                                                           |                    |
| 5  |                      |                                                                           |                    |
| 6  | Eligibility criteria | <a href="#">#10</a> Inclusion and exclusion criteria for participants. If | 6                  |
| 7  |                      |                                                                           |                    |
| 8  |                      | applicable, eligibility criteria for study centres and                    |                    |
| 9  |                      |                                                                           |                    |
| 10 |                      | individuals who will perform the interventions (eg,                       |                    |
| 11 |                      |                                                                           |                    |
| 12 |                      | surgeons, psychotherapists)                                               |                    |
| 13 |                      |                                                                           |                    |
| 14 |                      |                                                                           |                    |
| 15 |                      |                                                                           |                    |
| 16 | Interventions:       | <a href="#">#11a</a> Interventions for each group with sufficient detail  | 5,8                |
| 17 |                      |                                                                           |                    |
| 18 | description          | to allow replication, including how and when they                         |                    |
| 19 |                      |                                                                           |                    |
| 20 |                      | will be administered                                                      |                    |
| 21 |                      |                                                                           |                    |
| 22 |                      |                                                                           |                    |
| 23 | Interventions:       | <a href="#">#11b</a> Criteria for discontinuing or modifying allocated    | n/a                |
| 24 |                      |                                                                           |                    |
| 25 | modifications        | interventions for a given trial participant (eg, drug                     |                    |
| 26 |                      |                                                                           | There are no plans |
| 27 |                      |                                                                           | to discontinue or  |
| 28 |                      | dose change in response to harms, participant                             | modify the         |
| 29 |                      |                                                                           | interventions.     |
| 30 |                      | request, or improving / worsening disease)                                |                    |
| 31 |                      |                                                                           |                    |
| 32 |                      |                                                                           |                    |
| 33 |                      |                                                                           |                    |
| 34 |                      |                                                                           |                    |
| 35 |                      |                                                                           |                    |
| 36 | Interventions:       | <a href="#">#11c</a> Strategies to improve adherence to intervention      | 7                  |
| 37 |                      |                                                                           |                    |
| 38 | adherence            | protocols, and any procedures for monitoring                              |                    |
| 39 |                      |                                                                           |                    |
| 40 |                      | adherence (eg, drug tablet return; laboratory                             |                    |
| 41 |                      |                                                                           |                    |
| 42 |                      | tests)                                                                    |                    |
| 43 |                      |                                                                           |                    |
| 44 |                      |                                                                           |                    |
| 45 |                      |                                                                           |                    |
| 46 | Interventions:       | <a href="#">#11d</a> Relevant concomitant care and interventions that     | n/a                |
| 47 |                      |                                                                           |                    |
| 48 | concomitant care     | are permitted or prohibited during the trial                              |                    |
| 49 |                      |                                                                           |                    |
| 50 |                      |                                                                           |                    |
| 51 | Outcomes             | <a href="#">#12</a> Primary, secondary, and other outcomes,               | 12-15              |
| 52 |                      |                                                                           |                    |
| 53 |                      | including the specific measurement variable (eg,                          |                    |
| 54 |                      |                                                                           |                    |
| 55 |                      | systolic blood pressure), analysis metric (eg,                            |                    |
| 56 |                      |                                                                           |                    |
| 57 |                      |                                                                           |                    |
| 58 |                      |                                                                           |                    |
| 59 |                      |                                                                           |                    |
| 60 |                      |                                                                           |                    |

change from baseline, final value, time to event), method of aggregation (eg, median, proportion), and time point for each outcome. Explanation of the clinical relevance of chosen efficacy and harm outcomes is strongly recommended

|                      |                     |                                                                                                                                                                                       |     |
|----------------------|---------------------|---------------------------------------------------------------------------------------------------------------------------------------------------------------------------------------|-----|
| Participant timeline | <a href="#">#13</a> | Time schedule of enrolment, interventions (including any run-ins and washouts), assessments, and visits for participants. A schematic diagram is highly recommended (see Figure)      | 7   |
| Sample size          | <a href="#">#14</a> | Estimated number of participants needed to achieve study objectives and how it was determined, including clinical and statistical assumptions supporting any sample size calculations | 15  |
| Recruitment          | <a href="#">#15</a> | Strategies for achieving adequate participant enrolment to reach target sample size                                                                                                   | 6-7 |

## Methods:

### Assignment of interventions (for controlled trials)

|                                 |                      |                                                                                                                                             |   |
|---------------------------------|----------------------|---------------------------------------------------------------------------------------------------------------------------------------------|---|
| Allocation: sequence generation | <a href="#">#16a</a> | Method of generating the allocation sequence (eg, computer-generated random numbers), and list of any factors for stratification. To reduce | 7 |
|---------------------------------|----------------------|---------------------------------------------------------------------------------------------------------------------------------------------|---|



|    |                        |                                                                       |       |
|----|------------------------|-----------------------------------------------------------------------|-------|
| 1  |                        | predictability of a random sequence, details of any                   |       |
| 2  |                        | planned restriction (eg, blocking) should be                          |       |
| 3  |                        | provided in a separate document that is                               |       |
| 4  |                        | unavailable to those who enrol participants or                        |       |
| 5  |                        | assign interventions                                                  |       |
| 6  |                        |                                                                       |       |
| 7  |                        |                                                                       |       |
| 8  |                        |                                                                       |       |
| 9  |                        |                                                                       |       |
| 10 |                        |                                                                       |       |
| 11 |                        |                                                                       |       |
| 12 |                        |                                                                       |       |
| 13 | Allocation             | <a href="#">#16b</a> Mechanism of implementing the allocation         | 7     |
| 14 |                        |                                                                       |       |
| 15 | concealment            | sequence (eg, central telephone; sequentially                         |       |
| 16 |                        | numbered, opaque, sealed envelopes), describing                       |       |
| 17 | mechanism              | any steps to conceal the sequence until                               |       |
| 18 |                        | interventions are assigned                                            |       |
| 19 |                        |                                                                       |       |
| 20 |                        |                                                                       |       |
| 21 |                        |                                                                       |       |
| 22 |                        |                                                                       |       |
| 23 |                        |                                                                       |       |
| 24 |                        |                                                                       |       |
| 25 | Allocation:            | <a href="#">#16c</a> Who will generate the allocation sequence, who   | 7     |
| 26 |                        |                                                                       |       |
| 27 | implementation         | will enrol participants, and who will assign                          |       |
| 28 |                        | participants to interventions                                         |       |
| 29 |                        |                                                                       |       |
| 30 |                        |                                                                       |       |
| 31 |                        |                                                                       |       |
| 32 | Blinding (masking)     | <a href="#">#17a</a> Who will be blinded after assignment to          | 8     |
| 33 |                        | interventions (eg, trial participants, care providers,                |       |
| 34 |                        | outcome assessors, data analysts), and how                            |       |
| 35 |                        |                                                                       |       |
| 36 |                        |                                                                       |       |
| 37 |                        |                                                                       |       |
| 38 |                        |                                                                       |       |
| 39 |                        |                                                                       |       |
| 40 | Blinding (masking):    | <a href="#">#17b</a> If blinded, circumstances under which unblinding | 8     |
| 41 |                        |                                                                       |       |
| 42 | emergency              | is permissible, and procedure for revealing a                         |       |
| 43 |                        | participant's allocated intervention during the trial                 |       |
| 44 | unblinding             |                                                                       |       |
| 45 |                        |                                                                       |       |
| 46 |                        |                                                                       |       |
| 47 |                        |                                                                       |       |
| 48 | <b>Methods: Data</b>   |                                                                       |       |
| 49 |                        |                                                                       |       |
| 50 | <b>collection,</b>     |                                                                       |       |
| 51 |                        |                                                                       |       |
| 52 | <b>management, and</b> |                                                                       |       |
| 53 |                        |                                                                       |       |
| 54 | <b>analysis</b>        |                                                                       |       |
| 55 |                        |                                                                       |       |
| 56 |                        |                                                                       |       |
| 57 |                        |                                                                       |       |
| 58 | Data collection plan   | <a href="#">#18a</a> Plans for assessment and collection of outcome,  | 12-15 |
| 59 |                        |                                                                       |       |
| 60 |                        |                                                                       |       |

1 baseline, and other trial data, including any  
 2 related processes to promote data quality (eg,  
 3 duplicate measurements, training of assessors)  
 4 and a description of study instruments (eg,  
 5 questionnaires, laboratory tests) along with their  
 6 reliability and validity, if known. Reference to  
 7 where data collection forms can be found, if not in  
 8 the protocol  
 9  
 10  
 11  
 12  
 13  
 14  
 15  
 16  
 17  
 18

|    |                                             |                                                      |       |
|----|---------------------------------------------|------------------------------------------------------|-------|
| 19 | Data collection plan: <a href="#">#18b</a>  | Plans to promote participant retention and           | 14    |
| 20 | retention                                   | complete follow-up, including list of any outcome    |       |
| 21 |                                             | data to be collected for participants who            |       |
| 22 |                                             | discontinue or deviate from intervention protocols   |       |
| 23 |                                             |                                                      |       |
| 24 |                                             |                                                      |       |
| 25 |                                             |                                                      |       |
| 26 |                                             |                                                      |       |
| 27 |                                             |                                                      |       |
| 28 |                                             |                                                      |       |
| 29 | Data management <a href="#">#19</a>         | Plans for data entry, coding, security, and storage, | 15-16 |
| 30 |                                             | including any related processes to promote data      |       |
| 31 |                                             | quality (eg, double data entry; range checks for     |       |
| 32 |                                             | data values). Reference to where details of data     |       |
| 33 |                                             | management procedures can be found, if not in        |       |
| 34 |                                             | the protocol                                         |       |
| 35 |                                             |                                                      |       |
| 36 |                                             |                                                      |       |
| 37 |                                             |                                                      |       |
| 38 |                                             |                                                      |       |
| 39 |                                             |                                                      |       |
| 40 |                                             |                                                      |       |
| 41 |                                             |                                                      |       |
| 42 |                                             |                                                      |       |
| 43 | Statistics: outcomes <a href="#">#20a</a>   | Statistical methods for analysing primary and        | 16    |
| 44 |                                             | secondary outcomes. Reference to where other         |       |
| 45 |                                             | details of the statistical analysis plan can be      |       |
| 46 |                                             | found, if not in the protocol                        |       |
| 47 |                                             |                                                      |       |
| 48 |                                             |                                                      |       |
| 49 |                                             |                                                      |       |
| 50 |                                             |                                                      |       |
| 51 |                                             |                                                      |       |
| 52 |                                             |                                                      |       |
| 53 | Statistics: additional <a href="#">#20b</a> | Methods for any additional analyses (eg,             | 16    |
| 54 | analyses                                    | subgroup and adjusted analyses)                      |       |
| 55 |                                             |                                                      |       |
| 56 |                                             |                                                      |       |
| 57 |                                             |                                                      |       |
| 58 |                                             |                                                      |       |
| 59 |                                             |                                                      |       |
| 60 |                                             |                                                      |       |

|    |                            |                      |                                                   |       |
|----|----------------------------|----------------------|---------------------------------------------------|-------|
| 1  | Statistics: analysis       | <a href="#">#20c</a> | Definition of analysis population relating to     | 16    |
| 2  |                            |                      |                                                   |       |
| 3  | population and             |                      | protocol non-adherence (eg, as randomised         |       |
| 4  |                            |                      |                                                   |       |
| 5  | missing data               |                      | analysis), and any statistical methods to handle  |       |
| 6  |                            |                      |                                                   |       |
| 7  |                            |                      | missing data (eg, multiple imputation)            |       |
| 8  |                            |                      |                                                   |       |
| 9  |                            |                      |                                                   |       |
| 10 |                            |                      |                                                   |       |
| 11 | <b>Methods: Monitoring</b> |                      |                                                   |       |
| 12 |                            |                      |                                                   |       |
| 13 |                            |                      |                                                   |       |
| 14 | Data monitoring:           | <a href="#">#21a</a> | Composition of data monitoring committee (DMC);   | 16    |
| 15 |                            |                      |                                                   |       |
| 16 | formal committee           |                      | summary of its role and reporting structure;      |       |
| 17 |                            |                      |                                                   |       |
| 18 |                            |                      | statement of whether it is independent from the   |       |
| 19 |                            |                      |                                                   |       |
| 20 |                            |                      | sponsor and competing interests; and reference to |       |
| 21 |                            |                      |                                                   |       |
| 22 |                            |                      | where further details about its charter can be    |       |
| 23 |                            |                      |                                                   |       |
| 24 |                            |                      | found, if not in the protocol. Alternatively, an  |       |
| 25 |                            |                      |                                                   |       |
| 26 |                            |                      | explanation of why a DMC is not needed            |       |
| 27 |                            |                      |                                                   |       |
| 28 |                            |                      |                                                   |       |
| 29 |                            |                      |                                                   |       |
| 30 |                            |                      |                                                   |       |
| 31 | Data monitoring:           | <a href="#">#21b</a> | Description of any interim analyses and stopping  | 16    |
| 32 |                            |                      |                                                   |       |
| 33 | interim analysis           |                      | guidelines, including who will have access to     |       |
| 34 |                            |                      |                                                   |       |
| 35 |                            |                      | these interim results and make the final decision |       |
| 36 |                            |                      |                                                   |       |
| 37 |                            |                      | to terminate the trial                            |       |
| 38 |                            |                      |                                                   |       |
| 39 |                            |                      |                                                   |       |
| 40 |                            |                      |                                                   |       |
| 41 | Harms                      | <a href="#">#22</a>  | Plans for collecting, assessing, reporting, and   | 16-17 |
| 42 |                            |                      |                                                   |       |
| 43 |                            |                      | managing solicited and spontaneously reported     |       |
| 44 |                            |                      |                                                   |       |
| 45 |                            |                      | adverse events and other unintended effects of    |       |
| 46 |                            |                      |                                                   |       |
| 47 |                            |                      | trial interventions or trial conduct              |       |
| 48 |                            |                      |                                                   |       |
| 49 |                            |                      |                                                   |       |
| 50 |                            |                      |                                                   |       |
| 51 | Auditing                   | <a href="#">#23</a>  | Frequency and procedures for auditing trial       | 19    |
| 52 |                            |                      |                                                   |       |
| 53 |                            |                      | conduct, if any, and whether the process will be  |       |
| 54 |                            |                      |                                                   |       |
| 55 |                            |                      | independent from investigators and the sponsor    |       |
| 56 |                            |                      |                                                   |       |
| 57 |                            |                      |                                                   |       |
| 58 |                            |                      |                                                   |       |
| 59 |                            |                      |                                                   |       |
| 60 |                            |                      |                                                   |       |

1 **Ethics and**

2  
3 **dissemination**

|    |                    |                      |                                                        |
|----|--------------------|----------------------|--------------------------------------------------------|
| 4  |                    |                      |                                                        |
| 5  |                    |                      |                                                        |
| 6  |                    |                      |                                                        |
| 7  | Research ethics    | <a href="#">#24</a>  | Plans for seeking research ethics committee /          |
| 8  |                    |                      |                                                        |
| 9  | approval           |                      | institutional review board (REC / IRB) approval        |
| 10 |                    |                      |                                                        |
| 11 |                    |                      |                                                        |
| 12 | Protocol           | <a href="#">#25</a>  | Plans for communicating important protocol             |
| 13 |                    |                      |                                                        |
| 14 | amendments         |                      | modifications (eg, changes to eligibility criteria,    |
| 15 |                    |                      | outcomes, analyses) to relevant parties (eg,           |
| 16 |                    |                      | investigators, REC / IRBs, trial participants, trial   |
| 17 |                    |                      | registries, journals, regulators)                      |
| 18 |                    |                      |                                                        |
| 19 |                    |                      |                                                        |
| 20 |                    |                      |                                                        |
| 21 |                    |                      |                                                        |
| 22 |                    |                      |                                                        |
| 23 |                    |                      |                                                        |
| 24 | Consent or assent  | <a href="#">#26a</a> | Who will obtain informed consent or assent from        |
| 25 |                    |                      |                                                        |
| 26 |                    |                      | potential trial participants or authorised             |
| 27 |                    |                      | surrogates, and how (see Item 32)                      |
| 28 |                    |                      |                                                        |
| 29 |                    |                      |                                                        |
| 30 |                    |                      |                                                        |
| 31 |                    |                      |                                                        |
| 32 | Consent or assent: | <a href="#">#26b</a> | Additional consent provisions for collection and       |
| 33 |                    |                      |                                                        |
| 34 | ancillary studies  |                      | use of participant data and biological specimens       |
| 35 |                    |                      |                                                        |
| 36 |                    |                      | in ancillary studies, if applicable                    |
| 37 |                    |                      |                                                        |
| 38 |                    |                      |                                                        |
| 39 |                    |                      |                                                        |
| 40 |                    |                      |                                                        |
| 41 |                    |                      |                                                        |
| 42 |                    |                      |                                                        |
| 43 | Confidentiality    | <a href="#">#27</a>  | How personal information about potential and           |
| 44 |                    |                      |                                                        |
| 45 |                    |                      | enrolled participants will be collected, shared, and   |
| 46 |                    |                      |                                                        |
| 47 |                    |                      | maintained in order to protect confidentiality         |
| 48 |                    |                      |                                                        |
| 49 |                    |                      | before, during, and after the trial                    |
| 50 |                    |                      |                                                        |
| 51 |                    |                      |                                                        |
| 52 | Declaration of     | <a href="#">#28</a>  | Financial and other competing interests for            |
| 53 |                    |                      |                                                        |
| 54 | interests          |                      | principal investigators for the overall trial and each |
| 55 |                    |                      |                                                        |
| 56 |                    |                      | study site                                             |
| 57 |                    |                      |                                                        |
| 58 |                    |                      |                                                        |
| 59 |                    |                      |                                                        |
| 60 |                    |                      |                                                        |

|    |                       |                      |                                                        |                    |
|----|-----------------------|----------------------|--------------------------------------------------------|--------------------|
| 1  | Data access           | <a href="#">#29</a>  | Statement of who will have access to the final trial   | 16                 |
| 2  |                       |                      |                                                        |                    |
| 3  |                       |                      | dataset, and disclosure of contractual agreements      |                    |
| 4  |                       |                      |                                                        |                    |
| 5  |                       |                      | that limit such access for investigators               |                    |
| 6  |                       |                      |                                                        |                    |
| 7  |                       |                      |                                                        |                    |
| 8  |                       |                      |                                                        |                    |
| 9  | Ancillary and post    | <a href="#">#30</a>  | Provisions, if any, for ancillary and post-trial care, | n/a                |
| 10 |                       |                      |                                                        |                    |
| 11 | trial care            |                      | and for compensation to those who suffer harm          | This is a low-risk |
| 12 |                       |                      |                                                        |                    |
| 13 |                       |                      | from trial participation                               | trial with minimal |
| 14 |                       |                      |                                                        |                    |
| 15 |                       |                      |                                                        | foreseen harms to  |
| 16 |                       |                      |                                                        |                    |
| 17 |                       |                      |                                                        | participants.      |
| 18 |                       |                      |                                                        |                    |
| 19 |                       |                      |                                                        |                    |
| 20 |                       |                      |                                                        |                    |
| 21 |                       |                      |                                                        |                    |
| 22 | Dissemination         | <a href="#">#31a</a> | Plans for investigators and sponsor to                 | 17                 |
| 23 |                       |                      |                                                        |                    |
| 24 | policy: trial results |                      | communicate trial results to participants,             |                    |
| 25 |                       |                      |                                                        |                    |
| 26 |                       |                      | healthcare professionals, the public, and other        |                    |
| 27 |                       |                      |                                                        |                    |
| 28 |                       |                      | relevant groups (eg, via publication, reporting in     |                    |
| 29 |                       |                      |                                                        |                    |
| 30 |                       |                      | results databases, or other data sharing               |                    |
| 31 |                       |                      |                                                        |                    |
| 32 |                       |                      | arrangements), including any publication               |                    |
| 33 |                       |                      |                                                        |                    |
| 34 |                       |                      | restrictions                                           |                    |
| 35 |                       |                      |                                                        |                    |
| 36 |                       |                      |                                                        |                    |
| 37 |                       |                      |                                                        |                    |
| 38 | Dissemination         | <a href="#">#31b</a> | Authorship eligibility guidelines and any intended     | 17                 |
| 39 |                       |                      |                                                        |                    |
| 40 | policy: authorship    |                      | use of professional writers                            |                    |
| 41 |                       |                      |                                                        |                    |
| 42 |                       |                      |                                                        |                    |
| 43 |                       |                      |                                                        |                    |
| 44 | Dissemination         | <a href="#">#31c</a> | Plans, if any, for granting public access to the full  | 17                 |
| 45 |                       |                      |                                                        |                    |
| 46 | policy: reproducible  |                      | protocol, participant-level dataset, and statistical   |                    |
| 47 |                       |                      |                                                        |                    |
| 48 | research              |                      | code                                                   |                    |
| 49 |                       |                      |                                                        |                    |
| 50 |                       |                      |                                                        |                    |
| 51 | <b>Appendices</b>     |                      |                                                        |                    |
| 52 |                       |                      |                                                        |                    |
| 53 |                       |                      |                                                        |                    |
| 54 | Informed consent      | <a href="#">#32</a>  | Model consent form and other related                   | Supp. file         |
| 55 |                       |                      |                                                        |                    |
| 56 | materials             |                      | documentation given to participants and                |                    |
| 57 |                       |                      |                                                        |                    |
| 58 |                       |                      |                                                        |                    |
| 59 |                       |                      |                                                        |                    |
| 60 |                       |                      |                                                        |                    |

1 authorised surrogates

2  
3  
4 Biological [#33](#) Plans for collection, laboratory evaluation, and n/a  
5  
6 specimens storage of biological specimens for genetic or  
7 No biological  
8 molecular analysis in the current trial and for  
9 specimens will be  
10 future use in ancillary studies, if applicable  
11 collected as part of  
12  
13 this trial.  
14  
15

16  
17 None The SPIRIT Explanation and Elaboration paper is distributed under the terms of the Creative  
18 Commons Attribution License CC-BY-NC. This checklist can be completed online using  
19 <https://www.goodreports.org/>, a tool made by the [EQUATOR Network](#) in collaboration with  
20  
21 [Penelope.ai](#)  
22  
23  
24  
25  
26  
27  
28  
29  
30  
31  
32  
33  
34  
35  
36  
37  
38  
39  
40  
41  
42  
43  
44  
45  
46  
47  
48  
49  
50  
51  
52  
53  
54  
55  
56  
57  
58  
59  
60

# BMJ Open

## Study protocol for a real-world evaluation of an integrated child and family health hub for migrant and refugee women

|                                 |                                                                                                                                                                                                                                                                                                                                                                                                                                                                                                                                                                                                                                                                                                                                                                                                                                                                                                                                                                                                                                                                                                                                                                                                                                                   |
|---------------------------------|---------------------------------------------------------------------------------------------------------------------------------------------------------------------------------------------------------------------------------------------------------------------------------------------------------------------------------------------------------------------------------------------------------------------------------------------------------------------------------------------------------------------------------------------------------------------------------------------------------------------------------------------------------------------------------------------------------------------------------------------------------------------------------------------------------------------------------------------------------------------------------------------------------------------------------------------------------------------------------------------------------------------------------------------------------------------------------------------------------------------------------------------------------------------------------------------------------------------------------------------------|
| Journal:                        | <i>BMJ Open</i>                                                                                                                                                                                                                                                                                                                                                                                                                                                                                                                                                                                                                                                                                                                                                                                                                                                                                                                                                                                                                                                                                                                                                                                                                                   |
| Manuscript ID                   | bmjopen-2022-061002.R1                                                                                                                                                                                                                                                                                                                                                                                                                                                                                                                                                                                                                                                                                                                                                                                                                                                                                                                                                                                                                                                                                                                                                                                                                            |
| Article Type:                   | Protocol                                                                                                                                                                                                                                                                                                                                                                                                                                                                                                                                                                                                                                                                                                                                                                                                                                                                                                                                                                                                                                                                                                                                                                                                                                          |
| Date Submitted by the Author:   | 19-Jul-2022                                                                                                                                                                                                                                                                                                                                                                                                                                                                                                                                                                                                                                                                                                                                                                                                                                                                                                                                                                                                                                                                                                                                                                                                                                       |
| Complete List of Authors:       | Hodgins, Michael; UNSW,<br>Ostojic, Katarina; University of New South Wales<br>Hu, Nan; UNSW,<br>Lawson, K; Western Sydney University<br>Samir, Nora; University of New South Wales - Randwick Campus, School of Women's and Children's Health<br>Webster, Amanda; South Eastern Sydney Local Health District<br>Rogers, Helen; South Eastern Sydney Local Health District,<br>Henry, Amanda ; University of New South Wales Faculty of Medicine, Women's and Children's Health<br>Murphy, Elisabeth; University of New South Wales; New South Wales Ministry of Health<br>Lingam, Raghu; University of New South Wales<br>Raman, Shanti; University of New South Wales School of Women's and Children's Health, ; South Western Sydney Local Health District, Community Paediatrics<br>Mendoza Diaz , Antonio; University of New South Wales, Discipline of Psychiatry<br>Dadich, Ann; Western Sydney University, School of Business<br>Eapen, Valsamma; South Western Sydney Local Health District, ICAMHS; University of New South Wales, School of Psychiatry<br>Rimes, Tania; South Eastern Sydney Local Health District, Child Youth and Family Services<br>Woolfenden, Susan ; University of New South Wales; Sydney Local Health District |
| <b>Primary Subject Heading</b>: | Public health                                                                                                                                                                                                                                                                                                                                                                                                                                                                                                                                                                                                                                                                                                                                                                                                                                                                                                                                                                                                                                                                                                                                                                                                                                     |
| Secondary Subject Heading:      | Paediatrics, Health services research, Research methods                                                                                                                                                                                                                                                                                                                                                                                                                                                                                                                                                                                                                                                                                                                                                                                                                                                                                                                                                                                                                                                                                                                                                                                           |
| Keywords:                       | Community child health < PAEDIATRICS, Maternal medicine < OBSTETRICS, Organisation of health services < HEALTH SERVICES ADMINISTRATION & MANAGEMENT, PAEDIATRICS, PUBLIC HEALTH                                                                                                                                                                                                                                                                                                                                                                                                                                                                                                                                                                                                                                                                                                                                                                                                                                                                                                                                                                                                                                                                   |
|                                 |                                                                                                                                                                                                                                                                                                                                                                                                                                                                                                                                                                                                                                                                                                                                                                                                                                                                                                                                                                                                                                                                                                                                                                                                                                                   |

1  
2  
3  
4  
5  
6  
7  
8  
9  
10  
11  
12  
13  
14  
15  
16  
17  
18  
19  
20  
21  
22  
23  
24  
25  
26  
27  
28  
29  
30  
31  
32  
33  
34  
35  
36  
37  
38  
39  
40  
41  
42  
43  
44  
45  
46  
47  
48  
49  
50  
51  
52  
53  
54  
55  
56  
57  
58  
59  
60

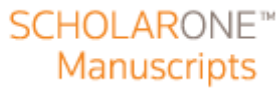



1  
2  
3  
4  
5 **TITLE:** Study protocol for a real-world evaluation of an integrated child and family  
6 health hub for migrant and refugee women  
7  
8  
9

10  
11 **AUTHORS:** Michael Hodgins<sup>1</sup>, Katarina Ostojic<sup>1</sup>, Nan Hu<sup>1</sup>, Kenny Lawson<sup>2</sup>, Nora Samir<sup>1</sup>,  
12 Amanda Webster<sup>3</sup>, Helen Rogers<sup>3</sup>, Amanda Henry<sup>1</sup>, Elisabeth Murphy<sup>4</sup>,  
13 Raghu Lingam<sup>1,5</sup>, Shanti Raman<sup>6</sup>, Antonio Mendoza Diaz<sup>1</sup>, Ann Dadich<sup>2</sup>,  
14 Valsamma Eapen<sup>1,6</sup>, Tania Rimes<sup>3\*</sup>, Sue Woolfenden<sup>1,7\*</sup>  
15

16 On behalf of the FDCC Collaborative Group  
17

### 18 **AFFILIATIONS**

19  
20 <sup>1</sup> University of New South Wales, NSW 2751  
21

22 <sup>2</sup> Western Sydney University, NSW 2150  
23

24 <sup>3</sup> South Eastern Sydney Local Health District, NSW 2229  
25

26 <sup>4</sup> North Sydney Local Health District, NSW 2065  
27

28 <sup>5</sup> Sydney Children's Hospitals Network, Sydney, NSW, 2031  
29

30 <sup>6</sup> South Western Sydney Local Health District, NSW 2170  
31

32 <sup>7</sup> Sydney, Institute for Women, Children and their Families, Sydney Local Health District, NSW  
33 2050  
34

### 35 **CORRESPONDING AUTHORS\***

36 Dr Michael Hodgins  
37

38 School of Women's & Children's Health  
39

40 UNSW  
41

42 Email: [michael.hodgins1@unsw.edu.au](mailto:michael.hodgins1@unsw.edu.au)  
43  
44  
45  
46  
47  
48

49 **KEYWORDS** Integrated care, community child health, maternal health, organisation of health  
50 services, paediatrics, public health  
51  
52  
53

54 1  
55  
56  
57  
58  
59  
60

1  
2  
3  
4  
5  
6  
7  
8  
9  
10  
11  
12  
13  
14  
15  
16  
17  
18  
19  
20  
21  
22  
23  
24  
25  
26  
27  
28  
29  
30  
31  
32  
33  
34  
35  
36  
37  
38  
39  
40  
41  
42  
43  
44  
45  
46  
47  
48  
49  
50  
51  
52  
53  
54  
55  
56  
57  
58  
59  
60

**WORD COUNTS**

Abstract: 299 words

Main text: 3,976 words (excluding title page, tables, and references)

**Protocol version:** version 1.0 (10.01.2022)

For peer review only

## ABSTRACT

**Introduction:** Continuity of child and family healthcare is vital for optimal child health and development for developmentally vulnerable children. Migrant and refugee communities are often at-risk of poor health outcomes, facing barriers to health service attendance including cultural, language, limited health literacy, discrimination, and unmet psychosocial needs. ‘Integrated health-social care hubs’ are physical hubs where health and social services are co-located, with shared referral pathways and care navigation.

**Aim:** Our study will evaluate the impact, implementation, and cost-benefit of the First 2000 Days Care Connect (FDCC) integrated hub model for pregnant migrant and refugee women and their infants.

**Materials and methods:** This study has three components. Component 1 is a non-randomised controlled trial to compare the FDCC model of care with usual care. This trial will allocate eligible women to intervention and control groups based on their proximity to the Hub sites. Outcome measures include: the proportion of children attending child and family health (CFH) nurse services and completing their CFH checks to 12 months of age; improved surveillance of growth and development in children up to 12 months, post-partum; improved breastfeeding rates; reduced emergency department presentations; and improve maternal wellbeing. These will be measured using linked medical record data and surveys. Component 2 will involve a mixed-method implementation evaluation to clarify how and why FDCC was implemented within the sites to inform future roll-out. Component 3 is a within-trial economic evaluation from a healthcare perspective to assess the cost-effectiveness of the Hubs relative to usual care and the implementation costs if Hubs were scaled and replicated.

**Ethics and dissemination:** Ethical approval was granted by the South Eastern Sydney Local Health District Human Research Ethics Committee in July 2021 (Project ID: 020/ETH03295). Results will be submitted for publication in peer-reviewed journals and presented at relevant conferences.

**Trial registration:** ACTRN12621001088831

## ARTICLE SUMMARY

### Strength and limitations

- First Australian multi-site non-randomised controlled trial to test the effectiveness of integrated health-social care hubs.
- The study is novel as it has an embedded implementation evaluation and economic evaluation in addition to the non-randomised trial component of the study.
- The non-randomised design of the trial has some limitations, particularly the inability to guarantee the comparability of the intervention and control groups.

### BACKGROUND AND RATIONALE

In New South Wales (NSW), Australia, 25% of children from migrant and refugee families are 'developmentally vulnerable'.<sup>1</sup> Developmental vulnerability is measured by the Australian Early Development Census across five domains including physical health and wellbeing, social competence, emotional maturity, language and cognitive skills, and communication skills and general knowledge. Children who are in the lowest 10 per cent of the national population are classified as developmentally 'vulnerable'.<sup>1</sup> Developmental vulnerability is associated with undetected maternal postnatal depression, the early cessation of breastfeeding<sup>2</sup>, and parental unmet psychosocial needs (e.g., housing, domestic violence).<sup>3 4</sup> Children who are developmentally vulnerable are twice as likely to struggle at school, experience adverse childhood events and have poorer long-term health outcomes and higher healthcare costs.<sup>1 5-12</sup> These adverse childhood events can continue into adulthood, contributing up to 44% of adult morbidity.<sup>13 14</sup>

Continuity of care with regular child and family health (CFH) checks by local health district (LHD) employed child and family health nurses (CFHN) are the foundation for optimal child health and development. This is particularly the case for priority populations, including newly arrived migrant and refugee women, children, and their families.<sup>5</sup> However, these populations also experience significant barriers to services including cultural, language, limited health literacy, discrimination, and unmet psychosocial needs.<sup>15-31</sup> Families with greater disadvantage are at greater risk of developmental vulnerability and poorer maternal mental health and other health problems. These families are less likely to engage with health services, particularly health promotion programs, like

4

1  
2  
3 CFH checks.<sup>2-4 15 32-36</sup>

4  
5 Australian policymakers identified service areas that need improvement to optimise outcomes in the  
6 first 2,000 days of a child's life.<sup>5 37</sup> These include the transition from maternity to CFH services;  
7 increasing uptake and length of time families stay connected with CFH services; and supporting  
8 priority populations. Unfortunately, in NSW, two-thirds of children stop attending CFH services by  
9 12 months of age,<sup>15 18-20</sup> further fragmenting care.

### 14 **Benefits of integrated health-social care hubs**

15  
16 To address the fragmented CFH services for priority populations, integrated health-social care hubs  
17 were established in multiple jurisdictions across Australia. These are physical hubs where health and  
18 social services are co-located, supported by care navigators and shared referral pathways.<sup>38 39</sup> Co-  
19 location and navigation support aims to remove barriers that hinder engagement between families  
20 and CFH services. However, the evidence-base for their effectiveness is limited. Our recent  
21 systematic review demonstrated the dearth of experimental trial evidence in Australia regarding  
22 physical CFH Hubs.<sup>40</sup> Yet, individual studies have found Hub models increase access to CFH  
23 services and the identification of developmental vulnerability.<sup>40</sup> Additionally, a recent scoping  
24 review of models of care across the continuum of pregnancy, birth, and the postpartum period for  
25 women from migrant and refugee backgrounds in high-income countries highlighted an evidence gap  
26 for models that improved maternal and child infant health outcomes.<sup>8</sup>

27  
28 We have extended this evidence-base by showing the feasibility and efficacy of integrated CFH  
29 hubs and cross-cultural workers (CCW) models in South Eastern Sydney.<sup>8 41-43</sup> These models support  
30 women and families to navigate maternity, CFH, and community-based services, providing  
31 continuity of care across the continuum of pregnancy and transition to CFH. The pilot interventions  
32 demonstrated that, for women and families from migrant and refugee populations: CFHN services  
33 embedded in integrated hubs increased the completion rate of CFH checks from 30% to 60% at 12-  
34 months and facilitated linkage with co-located non-government organisations.<sup>41 42</sup> Cross-cultural  
35 worker support in pregnancy was also highly rated by staff and pregnant women regarding support  
36 for pregnancy and linkage with services.<sup>44 45</sup>

### 52 **Current study: First 2000 Days Care Connect**

53  
54 5

1  
2  
3 *First 2000 Days Care Connect* (FDCC) is an integrated health-social care hub model that builds on  
4 these feasible and acceptable pilot interventions. The FDCC model involves co-located CFH services  
5 and non-government organisations (NGO), including psychosocial support services (e.g., playgroups,  
6 domestic violence support, mental health support, early childhood education, family support). These  
7 services operate from a physical location to facilitate service collaboration, integration, and a  
8 community-led approach to local needs. This Hub is supported by care navigation, increasing  
9 continuity from maternity to CFH services.  
10  
11  
12  
13  
14

### 15 **Objectives**

16  
17  
18 The overall aim of the FDCC study is to evaluate: the impact of FDCC (an integrated CFH Hub) on  
19 attendance at CFHN services and completion of CFH checks, support of child growth and  
20 development, breastfeeding and maternal wellbeing, and meeting family psychosocial needs  
21 (Component 1); the process of implementing FDCC (Component 2); and the cost-effectiveness of  
22 FDCC (Component 3).  
23  
24  
25  
26

## 27 **METHODS AND ANALYSIS**

### 28 **Study Setting**

29  
30  
31  
32 FDCC is a multisite study, conducted across three metropolitan LHDs in Greater Sydney, NSW –  
33 namely, SESLHD, SWSLHD, and NSLHD. Participants will be recruited from public and  
34 universally available antenatal services at participating public hospitals within the LHDs and receive  
35 services from CFHN services within each LHD.  
36  
37  
38

### 39 **Recruitment and Consent**

40  
41  
42 The study will recruit 240 women between November 2021 and April 2022. Eighty participants will  
43 be enrolled within SESLHD, NSLHD, and SWSLHD, with 40 allocated to the intervention arm  
44 (FDCC Hub) and 40 to the control arm (routine care). Potential participants are women attending  
45 antenatal clinics at the participating public hospitals within each study site and fulfilling the  
46 eligibility criteria (Table 1).  
47  
48  
49

50  
51 *Table 1: Inclusion and Exclusion Criteria*  
52  
53

54 6  
55  
56  
57  
58  
59  
60

| Inclusion criteria                                                                                                                                                                                                                                                                                                                                                                                                                                                                                                                                                                        | Exclusion criteria                                                                                                                                                                                                                                                                                                                                                                                                                                                                                                                                                                                 |
|-------------------------------------------------------------------------------------------------------------------------------------------------------------------------------------------------------------------------------------------------------------------------------------------------------------------------------------------------------------------------------------------------------------------------------------------------------------------------------------------------------------------------------------------------------------------------------------------|----------------------------------------------------------------------------------------------------------------------------------------------------------------------------------------------------------------------------------------------------------------------------------------------------------------------------------------------------------------------------------------------------------------------------------------------------------------------------------------------------------------------------------------------------------------------------------------------------|
| <p>Eligible women will be expectant mothers who are:</p> <ul style="list-style-type: none"> <li>• Attending antenatal clinics linked to the three study sites</li> <li>• Residing in geographical catchment for the respective antenatal clinic</li> <li>• Expectant mother &gt; 20 weeks gestation</li> <li>• 16 years of age or older at enrolment</li> <li>• Newly arrived migrant (&lt; 10 years in Australia) or self-identified refugee (&lt; 10 years in Australia), from a non-English speaking background</li> <li>• Provide a signed and dated informed consent form</li> </ul> | <ul style="list-style-type: none"> <li>• Does not comprehend the recruitment invitation (not proficient in English and/or declines the offer of an interpreter in their home language)</li> <li>• Have no mechanism for contact (telephone or email)</li> <li>• Already an active client in other targeted support services</li> <li>• Less than 16 years of age at enrolment</li> <li>• Migrant &gt; 10 years in Australia or self-identified refugee &gt; 10 years in Australia,</li> <li>• From an English speaking background</li> <li>• Not residing in geographical area of study</li> </ul> |

Using three processes, midwives and CCWs (where available) will identify eligible women attending antenatal services at the intervention sites during regular consultations. The processes include: midwives and CCW introduce the project to women attending a group model of antenatal care; midwives will promote the study during individual hospital antenatal visits and provide potential participants a flyer; and midwives will identify potential participants who meet the eligibility criteria and provide study details during regular antenatal visits. If potential participants provide verbal consent, they will be introduced to the project officer. The project officer will explain the study and provide a participant information sheet and consent form (PISCF) using translated documents and/or interpreter services, if required. They will confirm eligibility at face-to-face clinic visits or via telephone consultation. If the woman is not interested in the study, there will be no further contact regarding the study.

Participants will provide informed consent via completing paper-based consent forms, via email or verbally via phone or via online electronic signature option using the RedCap database. Participants consenting to the study can opt out of the data linkage component.

For component 2, once the FDCC trial is underway, the project implementation scientist will contact participating CFHNs, NGO staff, and Hub administrative staff via telephone and/or email to invite them to an interview or focus group. Prior to the interviews and focus groups, the implementation researcher will describe the study to participants and its rationale, providing a PISCF, and obtain informed consent. Hub staff and service leaders, including LHD partners and policymakers, will be

7

1  
2  
3 invited to complete a 32-item online survey at the completion of *Component 1*. The online survey  
4 will include a detailed description of the study, rationale, and an opportunity to indicate informed  
5 consent before survey completion. Hub staff and managers who do not complete the survey will  
6 receive a reminder thrice via email.  
7  
8  
9

## 10 **Study Procedures**

11  
12 This protocol has used the SPIRIT reporting guidelines.<sup>46</sup> Following the identification of potential  
13 participants, project officers will confirm participant eligibility as part of the consent process. This is  
14 a non-randomised study whereby eligible participants will be allocated to a study arm (FDCC  
15 intervention or control group) based on their residential postcode at the time of enrolment (see  
16 below). Participation will be 12 months, including: intervention allocation; intervention delivery (12  
17 months); and data collection (baseline, 6 months post-partum, 12 month post-partum). In addition to  
18 English, the study materials will be translated in the six most common community languages  
19 (Arabic, Bengali, Simplified Chinese, Korean, Hindi, and Vietnamese).  
20  
21  
22  
23  
24  
25  
26

### 27 *Allocation, Concealment, and Implementation*

28  
29 Women attending antenatal services from the participating hospitals who live in a defined  
30 geographic area (postcode) served by an established CFH Hub in their LHD will be allocated to the  
31 FDCC intervention group. Women attending antenatal services from the participating hospitals but  
32 do not live in the defined geographic area above will be in the control group.  
33  
34  
35  
36

### 37 *Blinding*

38  
39 Given the nature of the study, blinding to group allocation is impractical. However, as the  
40 intervention is dependent on participant postcode of residence, there is expected to be minimal  
41 treatment contamination between the intervention and control groups. To assess for intervention  
42 contamination, women in all groups will be asked at the 12 months postpartum assessment regarding  
43 the use of any Hub and CFHN service. While the site project officers collecting survey data at each  
44 site will not be blinded to allocation, the researcher analysing data will be blinded to group  
45 allocation.  
46  
47  
48  
49  
50

### 51 *Intervention*

52  
53  
54 8  
55  
56  
57  
58  
59  
60



1  
2  
3 After recruitment, the Hub navigator or key worker (i.e. an individual based at the hub responsible  
4 for linking participants with services, usually the CFHN) will contact participants to introduce Hub  
5 services and support engagement with identified services, if needed. This will be followed by another  
6 contact between birth and 8 weeks postpartum. Following mothers' and infants' discharge from  
7 birthing services, women will access CFH services via the Hub, as well as psychosocial support  
8 services suited to maternal needs and preferences. Per routine care, all women and their babies will  
9 be offered an appointment (approximately 1 hour) with a CFHN at 1 to 4 weeks postpartum, 6 to 8  
10 weeks postpartum, 6 months postpartum, and 12 months postpartum.

11  
12  
13  
14  
15  
16  
17 Hub services will be face-to-face, online, and one-to-one. Some services, such as playgroup or  
18 mothers' groups, might be in a group setting. Mothers and their babies will have access to the Hub  
19 for 12 months. Further contacts with the Hub navigator or keyworker as participants require.

20  
21  
22  
23 The integrated FDCC Hubs are a physical building and a way of working, facilitating service  
24 collaboration, integration, and a community-led approach to local needs. Hubs most commonly  
25 operate from a host building from which partner community-based or public services are delivered.  
26 In our Hub model, CFH services are co-located with NGOs. Families are linked with psychosocial  
27 support services, including playgroups, early childhood learning opportunities, and family support.  
28 Within the Hub services, existing CFH and NGO services support families to navigate systems and  
29 engage with other health services. These include general practitioners, early childhood, education,  
30 and psychosocial support to address their needs.

### 31 32 33 34 35 36 37 *Control Arm: Routine Care*

38  
39  
40 Pregnant women attending the participating hospitals who meet eligibility criteria but do not live in  
41 the geographic area will be allocated to a control cohort and receive routine care (e.g., receive  
42 information on CFHN services at discharge and follow-up as per current pathways).

### 43 44 45 **Implementation Evaluation**

46  
47 Our mixed-methods implementation evaluation will assess the barriers and facilitators to  
48 implementing the FDCC Hubs at the three sites, as guided by the consolidated framework for  
49 implementation research (CFIR).<sup>47</sup> The CFIR is a comprehensive framework designed to 'offer an  
50 overarching typology to promote implementation theory development and verification about what  
51  
52  
53  
54  
55  
56  
57  
58  
59  
60

works where and why across multiple contexts'.<sup>47</sup> The CFIR is widely used in diverse healthcare contexts, including primary care.<sup>48</sup> The CFIR identifies five major domains and guides the consideration and assessment of factors that can impact intervention implementation and effectiveness. Additionally, the researchers will evaluate specific implementation outcomes of acceptability, appropriateness, fidelity to the implementation strategy, coverage, sustainability, and cost (Table 2) as guided by the taxonomy proposed by Proctor and colleagues.<sup>49</sup>

*Table 2: Proctor and colleagues (2011) implementation outcomes mapped to FDCC evaluation*

|                 | <b>Questions addressed by each implementation factor</b>                         |
|-----------------|----------------------------------------------------------------------------------|
| Acceptability   | Do Hub staff and families view the Hub model as acceptable?                      |
| Adoption        | Do Hub staff intend to apply the Hub model as described in the study protocol?   |
| Appropriateness | Do Hub staff perceive the Hub model as relevant & useful for their services?     |
| Fidelity        | Is the Hub model applied as intended?                                            |
| Coverage        | How many eligible families are reached through the Hub model and keyworker?      |
| Cost            | How much does it cost to implement Hubs?                                         |
| Sustainability  | What are the factors that will allow the Hubs to be sustained/scaled-up further? |

#### *Logic Model*

We developed a logic model to inform the FDCC implementation evaluation (**Error! Reference source not found.**). We used a modified version of existing logic model frameworks<sup>50 51</sup> to include the inner context (i.e., individual factors, organisational settings) and the outer context of each site (i.e., area demographics, policy climate, relevant geographically adjacent clinical services). These contextual factors were incorporated within the logic modelling to enable implementation researchers to better describe the determinants of successful implementation in clinical practice.<sup>52</sup>

[INSERT FIGURE 1]

Additionally, we included a detailed description of the intervention to identify feasibility elements to measure during the study. These include features of the physical location of services, how services are integrated, the availability of culturally sensitive support materials and services, and the navigator or keyworker. To supplement the practical elements of the intervention, we described the underlying theoretical principles of the model. These include the collective impact framework<sup>53</sup> and the elements of the behaviour change wheel that we perceived the model to adhere.<sup>54</sup> Collective impact is designed to inform change on complex social issues, and draws on five conditions: common agenda; continuous communication; mutually reinforcing activities; backbone support; and

10

shared measurement.<sup>55</sup> Collective impact and the behavioural change wheel mechanisms of change within the logic model will inform the qualitative interview schedule. Finally, we drew connections from these underlying theories of change to the specific intermediate and long-term outcomes that we hypothesised the model will produce. Principally, we hypothesise that the intervention components will work on the core principles of environmental restructure, enablement, modelling, and training within the Hub sites, underpinned by the collective impact principles to support migrant and refugee parents to engage with health and social support services. This engagement will provide better outcomes for children and families. It will also create opportunities for shared knowledge between health and non-health services, as part of an acceptable and cost-effective model delivery. Table 3 provides an overview of the planned outcomes and measurement for the implementation evaluation.

*Table 3: Overview of the Implementation Evaluation Outcomes*

| <b>Implementation Evaluation Outcomes</b>                                                                                                            |                                                                                  |                                                                                                            |                                                                                                     |
|------------------------------------------------------------------------------------------------------------------------------------------------------|----------------------------------------------------------------------------------|------------------------------------------------------------------------------------------------------------|-----------------------------------------------------------------------------------------------------|
| <b>Outcome measure</b>                                                                                                                               | <b>Data Source</b>                                                               | <b>Methods</b>                                                                                             | <b>Data Collection</b>                                                                              |
| Description of local context and Hub                                                                                                                 | SEIFA data, search of grey literature, informal contact with Hub service leaders | SEIFA data, search of grey literature, informal contact with Hub service leaders                           | Trial commencement                                                                                  |
| Fidelity of Hub Model                                                                                                                                | Hub intervention log                                                             | A bespoke log completed by site project officers                                                           | Ongoing during the trial                                                                            |
| Acceptability of intervention measure (AIM), intervention appropriateness measure (IAM), and feasibility of intervention measure (FIM) <sup>56</sup> | Research survey administered by project officer                                  | AIM, IAM, and FIM measures completed by Hub staff, service leaders, participants in the intervention group | Trial end (included in the 12-month postpartum parent survey for parents and separate staff survey) |

|                                                                      |                                                                                    |                                                             |                                                                                                          |
|----------------------------------------------------------------------|------------------------------------------------------------------------------------|-------------------------------------------------------------|----------------------------------------------------------------------------------------------------------|
| Barriers and facilitators to running the FDCC Hubs                   | Interviews with Hub staff, service leaders, participants in the intervention group | Qualitative interviews and focus groups, guided by the CFIR | Pre-trial (with Hub staff and service leaders). Ongoing during and end of the trial for all participants |
| The NoMAD tool <sup>57</sup> to assess Hub staff buy in to the model | Research survey administered by project officer                                    | NoMAD tool completed by Hub staff                           | Trial end                                                                                                |

## Economic Evaluation

The economic evaluation will adopt a healthcare perspective beginning with a cost consequence analysis to describe the costs and all main study outcome measures (tables 4 and 5) and then generate a cost-utility analysis. The costs of Hub implementation will include: the establishment and operation of Hubs; and the flow-on cost from service use from Hub referrals. Hubs are likely to be implemented in different ways relative to local context and, as such, costs might differ. Two bespoke costing templates will be shared with Hub managers upon trial commencement to be completed at 6 and 12 months, with researcher support to ensure accuracy. The templates will allow for standardisation and between-site comparison.

### *Establishment and Operational Costs*

A micro-costing approach will be adopted to account for funded and in-kind expenditures.<sup>58 59</sup> A simple template will have major generic expenditure categories, including upfront capital costs (e.g., vehicles, buildings), governance arrangements to manage the Hubs (e.g., staff meeting time), material costs (e.g., brochures), and in-kind support from staff, including partner agencies. There might be expenditures against these categories. At this stage, there is no plan for capital expenditures. This is included for completeness. Operational costs pertain to daily Hub operation, including new staff hired (e.g., salary, on-costs), in-kind costs (e.g., time costs from non-salaried staff), venue costs (e.g., utilities, even if in-kind), and material costs (e.g., brochures).

### Referral Costs

Prior to Hub commencement, Hub personnel will be asked for a list of service partners to create a template where clients will be asked the services accessed and frequency; clients will be surveyed using this. Other sites will follow suit. Full client recall is not anticipated. However, it is important that the study clarifies the impact on referral services, if possible. A top-down costing estimate will then be made.<sup>58 59</sup> Each partner service will then be contacted to generate an estimate of the average client service cost. Providers typically adopt an activity-based costing approach in accounting and funding proposals. No specific client data will be accessed. Rather, the researchers will guide service providers to generate average costs, which typically only involves dividing total funding for service(s) by total occasions of service. Researchers will only be privy to the overall average costs. Where costs are unavailable, an approximation will be made if public and research data are available. Otherwise, a list of service counts only will be made and remain un-costed. Table 4 provides an overview of the planned outcomes and measurement for the implementation evaluation.

Table 4: Overview of the Economic Evaluation Outcomes

| <b>Economic Evaluation Outcomes</b>             |                                                 |                                                                                       |                                                                                         |
|-------------------------------------------------|-------------------------------------------------|---------------------------------------------------------------------------------------|-----------------------------------------------------------------------------------------|
| <b>Outcome measure</b>                          | <b>Data Source</b>                              | <b>Methods</b>                                                                        | <b>Data Collection</b>                                                                  |
| Mother quality of life (EQ-5D quality of life)  | Research survey administered by project officer | Research survey administered by project officer. EQ-5D quality of life questionnaire. | Baseline (antenatal time of enrolment)<br>6 months post-partum<br>12 months post-partum |
| Cost of implementing Hubs and referral services | Bespoke surveys                                 | Bespoke surveys completed by Hub Staff and Participants in the intervention group     | 6 and 12 months<br>6 and 12 months                                                      |

### Primary and Secondary Outcome Measures

Outcomes will be measured from enrolment (baseline) until and including 12 months post-partum (Table 5). Outcomes will be gathered via: the extraction of routinely collected clinical data from electronic medical records at each site or LHD; surveys administered by a researcher to mothers; and data linkage of participants with administrative datasets (NSW perinatal data collection, NSW

emergency department data collection). The primary outcome measure is the proportion of mothers and their respective infant who attend CFHN services for early childhood health checks at 1 to 4 weeks postpartum, 6-8 weeks postpartum, 6 months postpartum, and 12 months postpartum. For primary and secondary variables, see Table 5.

Table 5: Overview of the FDCC Study Outcome Variables

| <b>FDCC trial</b>                                                                                                                                               |                                                 |                                                                                                                                                                                           |                                                                                                                                                                                         |
|-----------------------------------------------------------------------------------------------------------------------------------------------------------------|-------------------------------------------------|-------------------------------------------------------------------------------------------------------------------------------------------------------------------------------------------|-----------------------------------------------------------------------------------------------------------------------------------------------------------------------------------------|
| <b>Outcome measure</b>                                                                                                                                          | <b>Data Source</b>                              | <b>Methods</b>                                                                                                                                                                            | <b>Data Collection</b>                                                                                                                                                                  |
| Proportion of mothers, children and families who attend CFHN at FDCC Hub for checks ( <i>Primary Outcome</i> )                                                  | Electronic medical record at LHD                | Extraction of routine clinical data from electronic medical record at LHD.                                                                                                                | <ul style="list-style-type: none"> <li>• 1-4 weeks post-partum</li> <li>• 6-8 weeks post-partum</li> <li>• 6 months post-partum</li> <li>• 12 months post-partum</li> </ul>             |
| Proportion of mothers, children and families who are up to date with age appropriate health checks, either via CFHN services or GP ( <i>Secondary Outcome</i> ) | Electronic medical record at LHD                | Extraction of routine clinical data from electronic medical record at LHD.                                                                                                                | <ul style="list-style-type: none"> <li>• 1-4 weeks post-partum</li> <li>• 6-8 weeks post-partum</li> <li>• 6 months post-partum</li> <li>• 12 months post-partum</li> </ul>             |
| Proportion of women identified as at risk of experiencing depression on the Edinburgh Depression Scale (EPDS) <sup>60</sup> ( <i>Secondary Outcome</i> )        | Electronic medical record at LHD                | Extraction of routine clinical data from electronic medical. <ul style="list-style-type: none"> <li>• Edinburgh Depression Scale (EPDS) total score</li> </ul> Response to item 10 of EDS | <ul style="list-style-type: none"> <li>• Baseline (antenatal time of enrolment)</li> <li>• 1-4 weeks post-partum or by 6-8 weeks post-partum</li> <li>• 6 months post-partum</li> </ul> |
| Proportion of women identified as having more than one unmet social need on the We Care questionnaire <sup>61</sup> ( <i>Secondary Outcome</i> )                | Research survey administered by project officer | Research survey administered by project officer. We Care questionnaire.                                                                                                                   | <ul style="list-style-type: none"> <li>• Baseline (antenatal time of enrolment)</li> <li>• 6 months post-partum</li> <li>• 12 months post-partum</li> </ul>                             |

14

|                                                                                                                                                                                                                                                 |                                                                                           |                                                                                                                                                                                                                                             |                                                                                                                                                                                                                                                                                                                                                   |
|-------------------------------------------------------------------------------------------------------------------------------------------------------------------------------------------------------------------------------------------------|-------------------------------------------------------------------------------------------|---------------------------------------------------------------------------------------------------------------------------------------------------------------------------------------------------------------------------------------------|---------------------------------------------------------------------------------------------------------------------------------------------------------------------------------------------------------------------------------------------------------------------------------------------------------------------------------------------------|
| <p>Proportion of women identified as experiencing psychosocial vulnerability on NSW Health psychosocial screening tools (Safe Start Psychosocial assessment including Domestic Violence screen)<sup>62</sup><br/><i>(Secondary Outcome)</i></p> | <p>Electronic medical record at LHD.</p>                                                  | <p>Extraction of routine clinical data from electronic medical. Presence/absence of psychosocial risk factors on Safe Start Psychosocial assessment including the Domestic Violence screen.</p>                                             | <ul style="list-style-type: none"> <li>• Baseline (antenatal time of enrolment)</li> <li>• 1-4 weeks post-partum or by 6-8 weeks post-partum</li> <li>• 6 months post-partum</li> </ul>                                                                                                                                                           |
| <p>Proportion of children monitored for growth parameters and their growth parameters (weight, height, head circumference)<br/><i>(Secondary Outcome)</i></p>                                                                                   | <p>Electronic medical record at LHD</p>                                                   | <p>Extraction of routine clinical data from electronic medical.</p> <ul style="list-style-type: none"> <li>• height (cm)</li> <li>• weight (kg)</li> <li>• head circumference (cm)</li> </ul>                                               | <ul style="list-style-type: none"> <li>• 1-4 weeks post-partum</li> <li>• 6-8 weeks post-partum</li> <li>• 6 months post-partum</li> <li>• 12 months post-partum</li> </ul>                                                                                                                                                                       |
| <p>Proportion of women exclusively breastfeeding /predominately breastfeeding/partially breastfeeding/ artificially feeding <i>(Secondary Outcome)</i></p>                                                                                      | <p>Electronic medical record at LHD. Data linkage with NSW Perinatal Data Collection.</p> | <p>Extraction of routine clinical data from electronic medical.</p> <ul style="list-style-type: none"> <li>• Exclusively breastfed</li> <li>• Predominately breastfed</li> <li>• Partial breastfed</li> <li>• Artificial feeding</li> </ul> | <p>Electronic medical record at LHD:</p> <ul style="list-style-type: none"> <li>• 1-4 weeks post-partum</li> <li>• 6-8 weeks post-partum</li> <li>• 6 months post-partum</li> </ul> <p>Data linkage with NSW Perinatal Data Collection</p> <ul style="list-style-type: none"> <li>• Breast feeding initiated at discharge postnatally.</li> </ul> |

|                                                                                                                                                                                                     |                                                                               |                                                                                                                                                                                                                                                                                                                                                                  |                                                                                                                                                                                       |
|-----------------------------------------------------------------------------------------------------------------------------------------------------------------------------------------------------|-------------------------------------------------------------------------------|------------------------------------------------------------------------------------------------------------------------------------------------------------------------------------------------------------------------------------------------------------------------------------------------------------------------------------------------------------------|---------------------------------------------------------------------------------------------------------------------------------------------------------------------------------------|
| <p>Proportion of children identified by CFHN as at developmental risk on the Learn the Signs Act Early (LtSAE) and Ages and Stages Questionnaire Screening tools<br/>(<i>Secondary Outcome</i>)</p> | <p>Electronic medical record at LHD</p>                                       | <p>Extraction of routine clinical data from electronic medical record at LHD.</p> <ul style="list-style-type: none"> <li>LtSAE screening completed, and the concerns/no concerns identified on LtSAE screening domains.</li> </ul> <p>Ages and Stages Questionnaire (ASQ &amp; ASQ-SE) secondary screener given to families by CFHN as clinically required .</p> | <ul style="list-style-type: none"> <li>6-8 weeks post-partum (LtSAE)</li> <li>6 months post-partum (LtSAE and ASQ)</li> </ul> <p>12 months post-partum (LtSAE and ASQ and ASQ-SE)</p> |
| <p>Mother and infant attendance at emergency departments from recruitment at 6-month postpartum and 12-month postpartum. (<i>Secondary Outcome</i>)</p>                                             | <p>Data linkage with NSW-wide Emergency Department Data Collection (EDDC)</p> | <p>NSW-wide EDDC data Linkage</p>                                                                                                                                                                                                                                                                                                                                | <p>At 6-month postpartum and 12-month postpartum.</p>                                                                                                                                 |

## Data Analysis Plan

### *Sample Size Estimation*

Based on pilot data, we anticipate the percentage of children to have their CFH check done by a CFHN will be 60% in the intervention group and 30% in the control group. Therefore, 72 children will be needed for each arm to provide 80% of power to detect the magnitude of such an increase with a  $p$  value  $<0.05$ . Allowing for a 40% attrition rate (i.e., loss-to-follow-up) as this is a vulnerable community<sup>15</sup>, we aim to recruit 120 children in each arm or 240 children in total across the three sites.

### *Statistical Analysis*

Statistical analysis will include descriptive analysis of participating mother and child outcomes at



1  
2  
3 each assessment. We will compare outcomes between the intervention and control groups using the  
4 Fisher's test for binary outcomes, Chi-square method for categorical outcomes, non-parametric  
5 method (e.g., Wilcoxon rank-sum test) and parametric methods (e.g., *t*-test) for continuous and  
6 ordinal variables. As outcomes will be measured repeatedly, multilevel regression analysis will be  
7 undertaken to examine intervention impact on outcomes, controlling for the plausible confounders at  
8 the individual (e.g., mother's sociodemographic characteristics, geographic area of residence) and  
9 community levels at baseline (e.g., neighbourhood socioeconomic factors). Generalised estimating  
10 equations method will be used in the regression analysis, considering the potential clustering effect  
11 by site. Only deidentified data will be analysed. No data safety monitoring committee is needed for  
12 this study due to the known minimal risks. No interim analyses or stopping rules will be applied.  
13  
14  
15  
16  
17  
18  
19

### 20 21 *Implementation Evaluation Analysis*

22  
23 Implementation effectiveness will be evaluated using the validated scoring system of -2 to +2 with  
24 score descriptions as follows: -2 indicates the construct has negatively influenced the practice and  
25 examples of negative manifestations are indicated; -1 indicates the construct has negatively  
26 influenced the practice and general statements of negative manifestations are made; 0 indicates the  
27 construct neutrally influenced the practice; +1 indicates the construct positively influenced the  
28 practice and general statements of positive manifestations are made; and +2 indicates the construct  
29 positively influenced the practice and explicit examples of positive manifestations are described.<sup>63</sup>  
30 Using these scores, construct scores can range from a low of -80 to a high of +80, demonstrating the  
31 key barriers and facilitators to uptake and sustain the FDCC hubs. This method of quantifying  
32 implementation effectiveness will be supplemented with an inductive analysis of qualitative data to  
33 ensure openness to emerging themes not readily captured by the CFIR and Proctor and colleague's  
34 outcome measures.<sup>49</sup>  
35  
36  
37  
38  
39  
40  
41  
42  
43

### 44 *Economic Analysis*

45  
46 First, a cost consequence analysis will collate and list the main costs and outcomes from the trial  
47 (table 4 and 5) to provide transparency regarding the overall impacts of Hubs. Second, a cost-utility  
48 will then report the incremental (net) cost per change in health utility (derived from the EQ5D)  
49 simulated using a decision tree, and where the threshold willingness to pay is varied between  
50  
51  
52  
53

1  
2  
3 \$42,000-\$67,000.<sup>64</sup> Third, a probability sensitivity analysis (PSA) and value of information analysis  
4 (VOI) will assess statistical uncertainty and value for further research, including for example the  
5 value of longer follow-up to assess medium-to-long term impacts.<sup>65</sup> Finally, a budget impact analysis  
6 (BIA) will estimate the overall financial cost if Hubs were scaled-up across NSW to inform policy  
7 affordability considerations. The latter will involve estimating the potential Hubs would be made and  
8 an average cost (of the three Hubs) applied, with high and low estimates in a sensitivity analysis.  
9

## 14 **Data Management**

15  
16 All participants will be allocated a randomly generated unique identifier code to be used throughout  
17 the study. Project officers will have identified information of the participants enrolled at their site,  
18 stored in password protected files. The project officer within each LHD will work with data  
19 managers to extract routinely collected clinical data from electronic medical records for all  
20 participants, per Table 3. Data will be stored within a protected site-based server. Only deidentified  
21 data will be transferred from each LHD to the researchers (SW, KO, NH) for data analysis, using  
22 encrypted transfer.  
23  
24

25  
26 Project officers with support from CCWs and/or interpreters will collect surveys at baseline, 6  
27 months postpartum, and 12 months postpartum. The survey can be completed in hardcopy (face-to-  
28 face or telephone) or online by participants using a secure link to REDCap®. Subsequently, project  
29 officers who can access the identifying information within each LHD will enter survey data into the  
30 REDCap® database. REDCap® is hosted on the University of NSW (UNSW) infrastructure.  
31 Permissions granted to each user within each REDCap® project is controlled by and is the  
32 responsibility of the project team. Hardcopy materials will be stored in locked cabinets for the  
33 required period, either indefinitely if the participant consents to providing their data for data pooling  
34 or for 15 years after the completion of the study. After these periods, hardcopy materials will be  
35 destroyed and password-protected electronic archives will be deleted.  
36  
37

38  
39 The identifying information collected within each LHD will be compiled into a single password-  
40 protected file and sent to The Centre for Health Record Linkage (CHeReL) for data linkage. The  
41 minimum identifying information for mothers and infants will be used to extract participant records  
42 from the administrative data. Upon completion of data extraction, CHeReL will transfer to UNSW  
43  
44  
45

46  
47  
48  
49  
50  
51  
52  
53  
54 18  
55  
56  
57  
58  
59  
60

1  
2  
3 administrative data of the participants who consented to data linkage. The administrative records will  
4 be deidentified by CHeReL, which will create the person project number (PPN) for each participant.  
5 The PPN will be linked to the participant's unique project identification number to link the  
6 administrative records with the electronic medical record (eMR) and survey records that belong to  
7 the same participant.  
8  
9  
10  
11

## 12 **Patient and Public Involvement**

13  
14 The research questions were developed based on qualitative research undertaken with Hub  
15 participants and community members and service providers in the pilot study.<sup>41 66</sup> The FDCC team  
16 have a consumer representative and consultation was undertaken with local Hub partner services.  
17 The researchers also consulted multicultural health services, including cultural support workers, to  
18 ensure research materials are culturally nuanced. Patients or participants have not directly been  
19 involved in the current study design.  
20  
21  
22  
23  
24  
25

## 26 **ETHICS AND DISSEMINATION**

27  
28 Ethical approval was granted by the South Eastern Sydney LHD (SESLHD) (2020/ETH03295). This  
29 trial was registered with the Australian New Zealand Clinical Trials (ACTRN12621001088831).  
30  
31

## 32 **Confidentiality**

33  
34 The researchers acknowledge that ensuring confidentiality is essential. The researchers will exercise  
35 due diligence to anonymise participants' responses for reporting, publication, and presentation  
36 purposes. Only deidentified data will be transferred from each LHD to the UNSW researchers for  
37 data analysis. The deidentified data from each LHD to the UNSW team will be securely transferred  
38 through a NSW Health-approved e-health platform.  
39  
40  
41  
42

## 43 **Managing Potential Harms**

44  
45 If issues are disclosed outside of the study parameters, mandatory NSW Health policy directives will  
46 apply (e.g., family and domestic violence, child protection matters). These will be managed as per  
47 current policies and practices within LHDs. The child protection and domestic violence counselling  
48 teams are readily accessible to provide advice and support if issues are identified. As the researchers  
49 are all mandatory reporters, they will inform participants that they are not able to maintain  
50  
51  
52  
53  
54

19

1  
2  
3 confidentiality when it relates to the safety of the participant, the child/ren, the family, and the wider  
4 community. These obligations are detailed in the PISCF (appendix 1).  
5  
6

### 7 **Dissemination**

8  
9 Data obtained for the study will be published in reports, peer reviewed journals and presented at  
10 appropriate conferences. The de-identified data will be available to all investigators. Access by  
11 individuals' other than the named investigators will only be permitted after consideration and  
12 agreement by all the remaining investigators. An essential element of knowledge translation are the  
13 study partners and advisors who will share findings and consider if and how to progress to trialling  
14 or implementing the program at scale. We intend to produce at least two papers (e.g. protocol, main  
15 findings) for peer-review publication, written by core research and implementation team.  
16  
17  
18  
19  
20  
21

### 22 **Study governance**

23  
24 The FDCC Team will support planning, implementation and governance of the project and ensure  
25 that WH&S requirements and policies are considered and actioned. There are currently no  
26 procedures for auditing trial conduct. All protocol modifications will be discussed within all levels of  
27 governance and communicated to the SESLHD HREC. Figure 2 outlines our governance structure.  
28  
29  
30

31 [INSERT FIGURE 2]  
32  
33

### 34 **Author contributions**

35  
36 The original trial design was conceived by SW, TR, AW, RL, VE and HR. The implementation  
37 evaluation design was conceived by MH and RL. The economic evaluation design was conceived by  
38 KL. The statistical analysis methods were initially designed by NH. MH developed the initial draft of  
39 the protocol, which was refined by SW, TR, AW, RL, VE, HR, KO, NH, KL, NS, AH, EM, SR,  
40 AMD, and AD. All authors approved, the final manuscript.  
41  
42  
43  
44  
45

### 46 **Funding statement**

47  
48 This project was funded by the NSW Health Translational Research Grants Scheme. The views  
49 expressed are those of the authors and not necessarily those of the partner organisations. Sue  
50 Woolfenden is funded through the National Health and Medical Research Council. Raghu Lingam is  
51  
52  
53

54 20  
55  
56  
57  
58  
59  
60

1  
2  
3 funded through the Financial Markets Foundation for Children. The project is supported in-kind by  
4 the Early Life Determinants of Health Clinical Academic Group, Maridulu Budyari Gumal  
5 (SPHERE).  
6  
7

### 8 9 **Competing interests**

10  
11 The views expressed are those of the author(s) and not necessarily those of the funding partners.  
12  
13 NSW Health has no direct role in study design; data collection, analysis, and interpretation, or  
14  
15 writing of final reports, presentations, or publications.  
16  
17

### 18 **Acknowledgements**

19  
20 This protocol has been authored on behalf of the FDCC Collaborative Group. The authors would like  
21  
22 to acknowledge the members of the group not listed as authors: Melissa Green, John Eastwood,  
23  
24 Karen Sorensen, Kim Lyle, Catherine Jones, Vicki Blight, Amit Arora, Michelle de Vroome,  
25  
26 Andrew Hayen, Nick Hopwood, Virginia Schmied, Rebekah Grace, Jane Kohlhoff, Fiona Brooks,  
27  
28 Cathy Kaplun, Kathleen Baird, Myna Hua, Lisa Woodland, Ben Harris-Roxas, Brendan Goodger,  
29  
30 Tracey Szanto, Karen Zwi, and Grainne O’Loughlin.

### 31 **REFERENCES**

- 32  
33  
34 1. AEDC. Australian Early Development Census. <https://www.aedc.gov.au/data/data-explorer?id=135216>. 2020  
35  
36 2. COAG. COAG Health Council 2019 The Australian National Breastfeeding Strategy: 2019 and  
37  
38 Beyond was prepared under the auspices of the COAG Health Council. 2019  
39  
40 3. Moore T, Arefadib N, Deery A, et al. The first thousand days: an evidence paper. *Melbourne:*  
41  
42 *Murdoch Children’s Research Institute* 2017  
43  
44 4. Goldfeld S, D’Abaco E, Bryson H, et al. Surveying social adversity in pregnancy: The antenatal risk  
45  
46 burden experienced by Australian women. *Journal of paediatrics and child health*  
47  
48 2018;54(7):754-60.  
49  
50 5. NSW Ministry of Health. The First 2000 Days Framework. 2019  
51  
52 6. Goldfeld S, O’Connor M, Chong S, et al. The impact of multidimensional disadvantage over  
53  
54 childhood on developmental outcomes in Australia. *International Journal of Epidemiology*  
55  
56 doi:<https://doi.org/10.1093/ije/dyy087>  
57  
58 7. Woolfenden S, Asher I, Bauert P, et al. Summary of position statement on inequities in child health.  
59  
60 2018;54(8):832-33.  
61  
62 8. Rogers HJ, Hogan L, Coates D, et al. Responding to the health needs of women from migrant and  
63  
64 refugee backgrounds—Models of maternity and postpartum care in high-income countries: A  
65  
66

21

- systematic scoping review. *Health & Social Care in the Community* 2020
9. Hiscock H, Danchin MH, Efron D, et al. Trends in paediatric practice in Australia: 2008 and 2013 national audits from the Australian Paediatric Research Network. *Journal of paediatrics and child health* 2017;53(1):55-61.
  10. Palfrey JS, Tonniges TF, Green M, et al. Introduction: addressing the millennial morbidity—the context of community pediatrics. *Pediatrics* 2005;115(Supplement 3):1121-23.
  11. Woolfenden S, Galea C, Smithers-Sheedy H, et al. Impact of social disadvantage on cerebral palsy severity. *Developmental Medicine & Child Neurology* 2019;61(5):586-92.
  12. Brinkman S, Gregory T, Harris J, et al. Associations between the early development instrument at age 5, and reading and numeracy skills at ages 8, 10 and 12: a prospective linked data study. *Child Indicators Research* 2013;6(4):695-708.
  13. Merrick MT, Ford DC, Ports KA, et al. Vital signs: Estimated proportion of adult health problems attributable to adverse childhood experiences and implications for prevention—25 States, 2015–2017. *Morbidity and Mortality Weekly Report* 2019;68(44):999.
  14. Kezelman C, Hossack N, Stavropoulos P, et al. The cost of unresolved childhood trauma and abuse in adults in Australia. Adults Surviving Child Abuse and Pegasus Economics, Sydney. 2015
  15. Woolfenden S, Eapen V, Jalaludin B, et al. Prevalence and factors associated with parental concerns about development detected by the Parents' Evaluation of Developmental Status (PEDS) at 6-month, 12-month and 18-month well-child checks in a birth cohort. *BMJ open* 2016;6(9):e012144.
  16. Ayer C, Eapen V, Overs B, et al. Risk factors for non-participation in a universal developmental surveillance program in a population in Australia. *Australian Health Review*
  17. Eapen V, Walter A, Guan J, et al. Maternal help-seeking for child developmental concerns: Associations with socio-demographic factors. *J Paediatr Child Health* 2017;53(10):963-69. doi: 10.1111/jpc.13607 [published Online First: 2017/07/01]
  18. Zwi K, Rungan S, Woolfenden S, et al. Refugee children and their health, development and well-being over the first year of settlement: A longitudinal study. *Journal of paediatrics and child health* 2017;53(9):841-49.
  19. NSW Health. NSW Child Health Survey 2009-2010 Summary report. 2010
  20. McLean K, Goldfeld S, Molloy C, et al. Screening and surveillance in early childhood health: rapid review of evidence for effectiveness and efficiency of models. *Ultimo, NSW, Australia: The Sax Institute* 2014
  21. Garg P, Ha MT, Eastwood J, et al. Explaining culturally and linguistically diverse (CALD) parents' access of healthcare services for developmental surveillance and anticipatory guidance: qualitative findings from the 'Watch Me Grow' study. *BMC health services research* 2017;17(1):228.
  22. Almeida LM, Caldas J, Ayres-de-Campos D, et al. Maternal healthcare in migrants: a systematic review. *Matern Child Health J* 2013;17(8):1346-54. doi: <https://dx.doi.org/10.1007/s10995-012-1149-x> [published Online First: 2013/01/22]
  23. Fellmeth G, Fazel M, Plugge E. Migration and perinatal mental health in women from low- and middle-income countries: a systematic review and meta-analysis. *BJOG* 2017;124(5):742-52. doi: <https://doi.org/10.1111/1471-0528.14184> [published Online First: 2016/06/21]
  24. World Health Organization (WHO). Promoting the health of refugees and migrants: Framework of priorities and guiding principles to promote the health of refugees and migrants. Geneva:

22

- WHO Secretariat, 2017:1-4.
25. Higginbottom G, Morgan M, Alexandre M, et al. Immigrant women's experiences of maternity-care services in Canada: a systematic review using a narrative synthesis. *Syst Rev* 2015;4(13):13. doi: <https://doi.org/10.1186/2046-4053-4-13> [published Online First: 2015/07/19]
  26. Correa-Velez I, Ryan J. Developing a best practice model of refugee maternity care. *Women Birth* 2012;25(1):13-22. doi: <https://dx.doi.org/10.1016/j.wombi.2011.01.002> [published Online First: 2011/02/15]
  27. Henderson S, Kendall E. Culturally and linguistically diverse peoples' knowledge of accessibility and utilisation of health services: exploring the need for improvement in health service delivery. *Aust J Prim Health* 2011;17(2):195-201. doi: <https://doi.org/10.1071/PY10065> [published Online First: 2011/06/08]
  28. Heslehurst N, Brown H, Pemu A, et al. Perinatal health outcomes and care among asylum seekers and refugees: a systematic review of systematic reviews. *BMC Medicine* 2018;16(1) doi: <https://doi.org/10.1186/s12916-018-1064-0> [published Online First: 2018/06/13]
  29. Boyle JA, Willey S, Abbasova G. Supporting better outcomes for migrant and refugee women. *O&G Magazine* 2018; 20(1). <https://www.ogmagazine.org.au/20/1-20/better-outcomes-migrant-refugee-women/>.
  30. Small R, Roth C, Raval M, et al. Immigrant and non-immigrant women's experiences of maternity care: a systematic and comparative review of studies in five countries. *BMC Pregnancy Childbirth* 2014;14(152):1-17. doi: 10.1186/1471-2393-14-152 [published Online First: 2014/04/30]
  31. Woolfenden S, Posada N, Krchnakova R, et al. Equitable access to developmental surveillance and early intervention - understanding the barriers for children from culturally and linguistically diverse (CALD) backgrounds. *Health Expectations* 2015;18(6):3286-301. doi: 10.1111/hex.12318
  32. Woolfenden S, Posada N, Krchnakova R, et al. Equitable access to developmental surveillance and early intervention - understanding the barriers for children from culturally and linguistically diverse (CALD) backgrounds. *Health Expect* doi: 101111/hex12318 2014
  33. Woolfenden S, Eapen V, Williams K, et al. A systematic review of the prevalence of parental concerns measured by the Parents' Evaluation of Developmental Status (PEDS) indicating developmental risk. *BMC Pediatr* 2014;14
  34. Woolfenden S, Galea C, Badland H, et al. Use of health services by preschool-aged children who are developmentally vulnerable and socioeconomically disadvantaged: testing the inverse care law. *J Epidemiol Community Health* 2020;74(6):495-501.
  35. Chando S, Craig JC, Burgess L, et al. Developmental risk among Aboriginal children living in urban areas in Australia: the Study of Environment on Aboriginal Resilience and Child Health (SEARCH). *BMC pediatrics* 2020;20(1):1-13.
  36. Alrashdi M, Hameed A, Cervantes Mendez MJ, et al. Education intervention with respect to the oral health knowledge, attitude, and behaviors of refugee families: A randomized clinical trial of effectiveness. *Journal of Public Health Dentistry* 2021;81(2):90-99. doi: <https://doi.org/10.1111/jphd.12415>
  37. Henry R. Review of health services for children, young people and families within the NSW Health system, 2019.

- 1  
2  
3  
4 38. National Academies of Sciences E, Medicine. Integrating Social Care Into the Delivery of Health  
5 Care: Moving Upstream to Improve the Nation's Health: Washington, DC: National  
6 Academies Press, 2019.
- 7 39. Moore T. Using place-based approaches to strengthen child wellbeing. *Developing Practice: The*  
8 *Child, Youth and Family Work Journal* 2014(40):40.
- 9 40. Glover J, Samir N, Kaplun C, et al. The effectiveness of place-based interventions in improving  
10 development, health and wellbeing outcomes in children aged 0–6 years living in  
11 disadvantaged neighbourhoods in high-income countries – A systematic review. *Wellbeing,*  
12 *Space and Society* 2021;2:100064. doi: <https://doi.org/10.1016/j.wss.2021.100064>
- 13 41. Edwards K, Rimes T, Smith R, et al. Improving Access to Early Childhood Developmental  
14 Surveillance for Children from Culturally and Linguistically Diverse (CALD) Background. .  
15 *Int J Integr Care* 2020;Apr;20(2)
- 16 42. Edwards K, Fernandez R, Rimes T, et al. “Happy, Healthy, Ready – working with early childhood  
17 non-government organisations for developmental surveillance for vulnerable children”. .  
18 *Australian Journal of Advanced Nursing* 2020; 37(4)
- 19 43. Alrashdi M, Cervantes Mendez MJ, Farokhi MR. A Randomized Clinical Trial Preventive  
20 Outreach Targeting Dental Caries and Oral-Health-Related Quality of Life for Refugee  
21 Children. *International Journal of Environmental Research and Public Health*  
22 2021;18(4):1686.
- 23 44. Rogers HJ, Hogan L, Coates D, et al. Cross Cultural Workers for women and families from migrant  
24 and refugee backgrounds: a mixed-methods study of service providers perceptions. *BMC*  
25 *Women's Health* 2021;21(1):222. doi: 10.1186/s12905-021-01368-4
- 26 45. Rogers HJ, Hogan L, Coates D, et al.
- 27 A Bridge to Health: The Cross Cultural Workers in Maternity and Child and Family Health Service  
28 for women and families from migrant and refugee backgrounds: A mixed-methods study of  
29 service providers perceptions in Sydney, Australia (Manuscript not yet published). 2020
- 30 46. Chan A-W, Tetzlaff JM, Gøtzsche PC, et al. SPIRIT 2013 explanation and elaboration: guidance  
31 for protocols of clinical trials. *Bmj* 2013;346
- 32 47. Damschroder LJ, Aron DC, Keith RE, et al. Fostering implementation of health services research  
33 findings into practice: a consolidated framework for advancing implementation science.  
34 *Implement Science* 2009;4(1):50.
- 35 48. Kirk MA, Kelley C, Yankey N, et al. A systematic review of the use of the consolidated framework  
36 for implementation research. *Implementation Science* 2016;11(72):1-13.
- 37 49. Proctor E, Silmere H, Raghavan R, et al. Outcomes for implementation research: conceptual  
38 distinctions, measurement challenges, and research agenda. *Administration and Policy in*  
39 *Mental Health and Mental Health Services Research* 2011;38(2):65-76.
- 40 50. Lawton B, Brandon PR, Cicchinelli L, et al. Logic Models: A Tool for Designing and Monitoring  
41 Program Evaluations. REL 2014-007. *Regional Educational Laboratory Pacific* 2014
- 42 51. U.S. Department of Health and Human Services Centres for Disease Control and Prevention.  
43 Introduction to program evaluation for public health programs: A self-study guide. Atlanta,  
44 GA: Centers for Disease Control and Prevention, 2011.
- 45 52. Li S-A, Jeffs L, Barwick M, et al. Organizational contextual features that influence the  
46 implementation of evidence-based practices across healthcare settings: a systematic integrative  
47  
48  
49  
50  
51  
52  
53



- review. *Systematic Reviews* 2018;7(1):72. doi: 10.1186/s13643-018-0734-5
53. Kania J, Kramer M. Collective impact: Leland Stanford Jr. University 2011.
  54. Michie S, Atkins L, West R. The behaviour change wheel. *A guide to designing interventions 1st ed Great Britain: Silverback Publishing* 2014:1003-10.
  55. Smart JR. Collective impact: Evidence and implications for practice: Australian Institute of Family Studies Melbourne 2017.
  56. Weiner BJ, Lewis CC, Stanick C, et al. Psychometric assessment of three newly developed implementation outcome measures. *Implementation Science* 2017;12(1):108.
  57. Finch TL, Rapley T, Girling M, et al. Improving the normalization of complex interventions: measure development based on normalization process theory (NoMAD): study protocol. *Implementation Science* 2013;8(1):43. doi: 10.1186/1748-5908-8-43
  58. Chapko MK, Liu CF, Perkins M, et al. Equivalence of two healthcare costing methods: bottom-up and top-down. *Health economics* 2009;18(10):1188-201.
  59. O'Brien B, Drummond MF, Sculpher MJ, et al. Methods for the economic evaluation of health care programmes: Oxford university press 2015.
  60. Cox JL, Holden JM, Sagovsky R. Detection of Postnatal Depression: Development of the 10-item Edinburgh Postnatal Depression Scale. *British Journal of Psychiatry* 1987;150(6):782-86. doi: 10.1192/bjp.150.6.782 [published Online First: 2018/01/02]
  61. Garg A, Toy S, Tripodis Y, et al. Addressing Social Determinants of Health at Well Child Care Visits: A Cluster RCT. *Pediatrics* 2015;135(2):e296-e304. doi: 10.1542/peds.2014-2888
  62. NSW Department of Health. NSW Health/Families NSW Supporting Families Early Package – SAFE START Strategic Policy, 2009.
  63. Damschroder LJ, Lowery JC. Evaluation of a large-scale weight management program using the consolidated framework for implementation research (CFIR). *Implementation Science* 2013;8(51):1-32.
  64. Huang L, Frijters P, Dalziel K, et al. Life satisfaction, QALYs, and the monetary value of health. *Social Science & Medicine* 2018;211:131-36. doi: <https://doi.org/10.1016/j.socscimed.2018.06.009>
  65. Briggs AH, Weinstein MC, Fenwick EAL, et al. Model Parameter Estimation and Uncertainty Analysis: A Report of the ISPOR-SMDM Modeling Good Research Practices Task Force Working Group–6. *Medical Decision Making* 2012;32(5):722-32. doi: 10.1177/0272989X12458348
  66. Edwards B, Mullan K, Katz I, et al. The Stronger Families in Australia (SFIA) Study: Phase 2 The Stronger Families in Australia (SFIA) Study: Phase 2. 2014

FIGURE 1: FDCC IMPLEMENTATION EVALUATION LOGIC MODEL

FIGURE 2: FDCC GOVERNANCE STRUCTURE

**CONTEXT**

**INTERVENTIONS** BMJ Open

**THEORETICAL FRAMEWORK**

**INTERMEDIATE OUTCOMES**

**LONG-TERM OUTCOMES**

**OUTER CONTEXT**

**INNER CONTEXT**

**Local area factors/LHD**

- Patient load
- Area socio-economic status
- Community health relationship with hospital
- Make up of community based agencies, public and private health services in area (Area mapping)

**Policy and governance context**

- Existing CAFH policy affecting practice
- First 2000 days
- NGO partners core business, funding bodies, governance board

**NGO factors**

- Partner buy in
- Diversity of partner services
- Alignment of partner services (Reciprocity between health & NGOs) Location
- Collaboration features (i.e. frequency of contact, regular meetings, services integrating in real time)
- Billing and funding

**Early childhood health staff factors**

- Organisational context Support of Hub intervention within practice
- Structure and delivery of hub model (times location, structure)
- Altered work flows
- Care navigation (dedicated role, clear pathways)
- Number of CFHN in Hub
- Involvement of allied health
- GP relationships (Bilingual, referrals, knowledge of CFH, Medicare eligible)

**Physical location**

- Services in the same building
- Soft entry through existing non-health, non-threatening service (i.e. playgroup)
- Accessible to migrant and refugee communities

**Integration of services**

- Referral pathways between services (supported/warm referral or proactive introduction)
- Communication between services
- Shared resources/training/measurement
- Common agenda

**Cultural sensitivity**

- Culturally sensitive practices
- Training and resources

**Key worker/ Navigator**

Point of contact between maternity and hub

**Collective Impact**

Collective impact is designed to create change on complex social issues, and draws on five conditions: common agenda, continuous communication, mutually reinforcing activities, backbone support and shared measurement.

**MECHANISMS OF CHANGE**

**Behaviour change wheel constructs**

- **Enablement** – Hub in a location that suits families, helping navigation to relevant services
- **Modelling** – Modelling health/NGO practices
- **Training** – Ensure staff have been trained in culturally sensitive practices. Shared language/ understanding of the model
- **Environment restructure** – Hub creating integrated care environment

**Service and community**

- Increased knowledge and capacity of local services to provide culturally sensitive care and address health and social needs.

**Child and Family**

- 60% of mothers/families attending CFH service at Hubs
- Increased Breastfeeding rates
- Early identification of psychosocial concerns
- Social needs met by improved service access
- Child at healthy weight

**System**

- Earlier intervention for health and social need, reduced hospital visits (ED presentations)
- Cost-effective model of care for NSW Health
- Evidence that access is feasible, appropriate and acceptable
- Replicable, acceptable, appropriate and sustainable models of care - First 2000 Days Framework.

**Child and Family**

- Mothers/families will have optimal mental health and children will be school ready

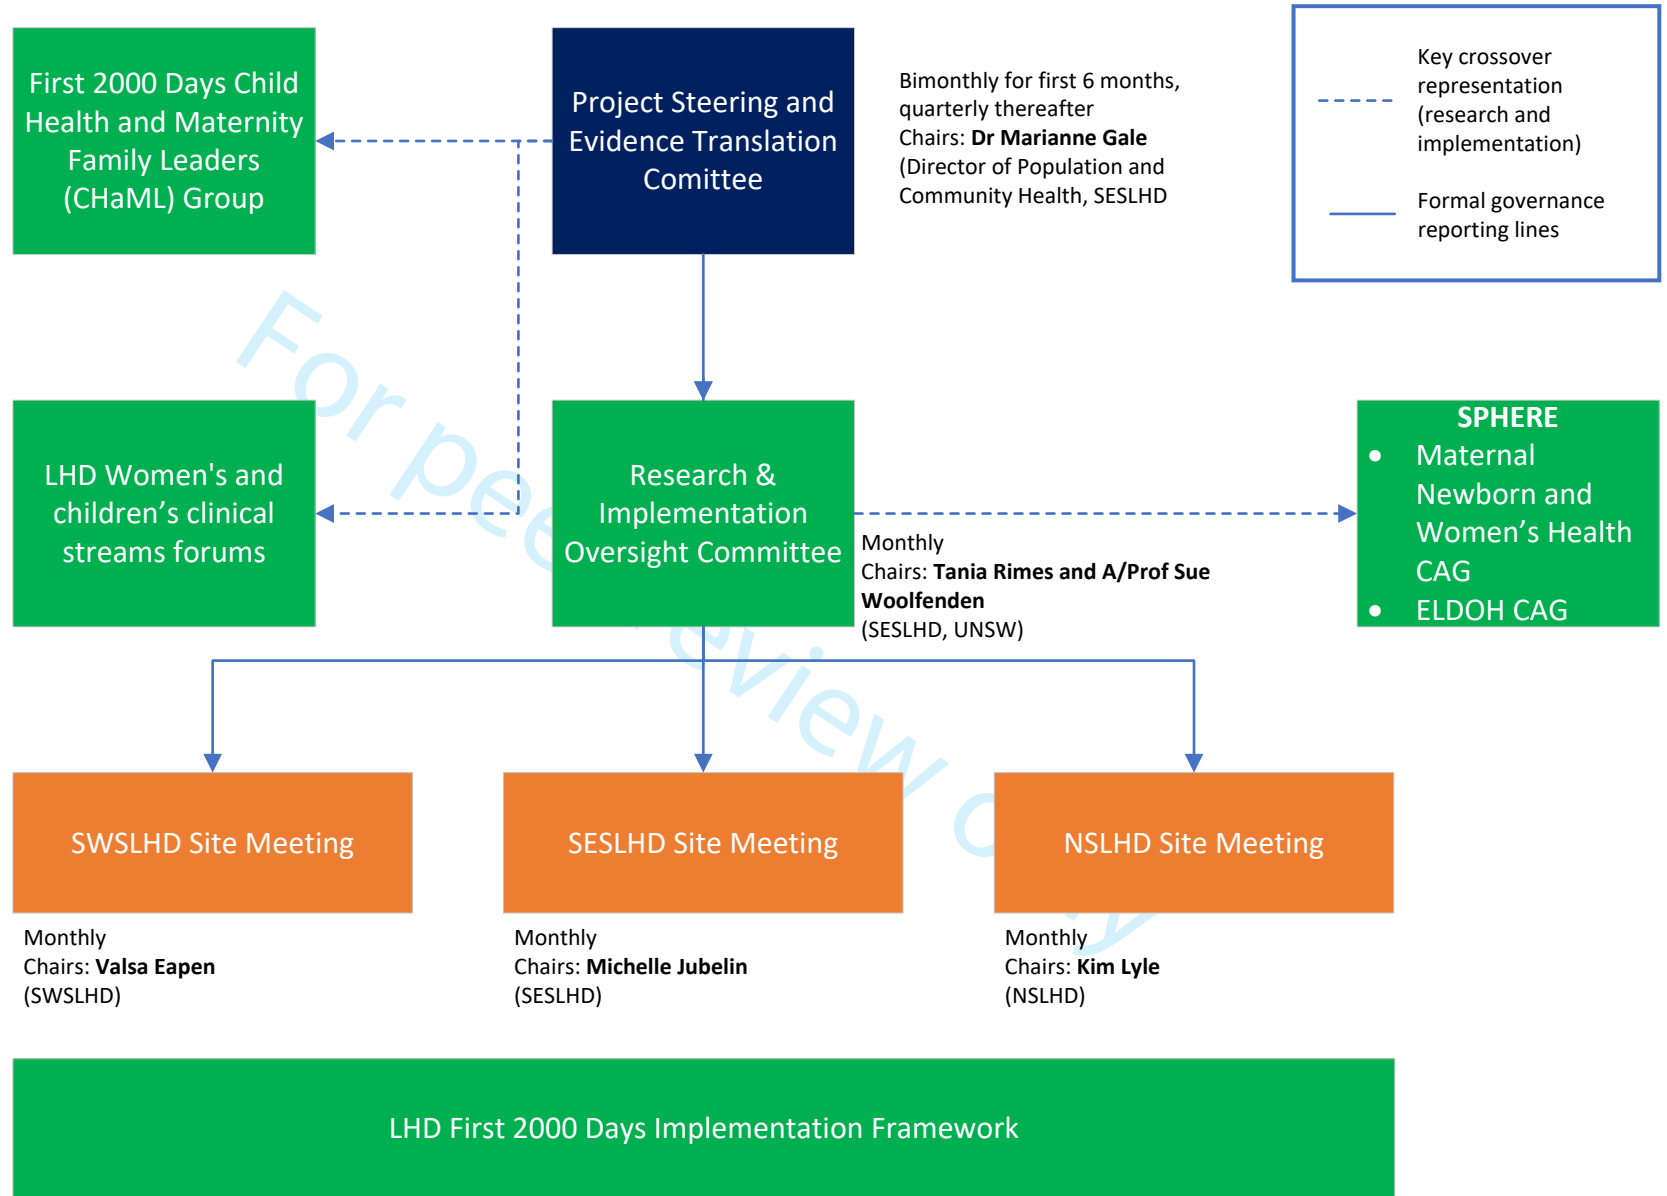

1  
2  
3  
4  
5  
6  
7  
8  
9  
10  
11  
12  
13  
14  
15  
16  
17  
18  
19  
20  
21  
22  
23  
24  
25  
26  
27  
28  
29  
30  
31  
32  
33  
34  
35  
36  
37  
38  
39  
40  
41  
42  
43  
44  
45  
46

## APPENDICES

### Appendix 1: Participant Information Sheet and Consent Form

#### Primary and Community Health Directorate

#### PARTICIPANT INFORMATION SHEET AND CONSENT FORM Participant

#### **Family Care Connect – a holistic first 2000 days model of care for women and families from migrant and refugee communities.**

#### Invitation

You are invited to take part in the Family Care Connect project. Family Care Connect involves child and family Hubs, where health and other agencies work together and you are supported to navigate these services. Our research is seeing whether these Hubs support the health and development of children, mothers and families from migrant and refugee communities.

#### Who is doing the research?

Tania Rimes

Children and Communities Program Coordinator

Primary and Community Health Directorate | South Eastern Sydney Local Health District (SESLHD).

Associate Professor Sue Woolfenden (Research lead)

NHMRC Senior Research Fellow, Population Child Health Group | The University of New South Wales (UNSW). Senior Staff Specialist, Community Child Health | Sydney Children's Hospitals Network.

Before you decide if you want to take part in this research, we would like to explain what we are doing and why we are doing it. . Please take the time to read the following information carefully. You can talk about it with a relative or a friend if you wish before deciding.

#### What is the purpose of this research?

We want to see if child and family Hubs help women and families from migrant and refugee communities move from pregnancy to Child and Family Health services. Also, we want to see if these Hubs support children's health and development in the first 12 months of life.

We will also look at how easy and cost-effective the Hub is for you and other women and families.

#### Why have I been invited to participate in this research?

You are eligible to participate in this research because you:

- are having your baby or recently given birth to your baby at [INSERT HOSPITAL SITES]
- live in the postcode of [INSERT POSTCODE/S]

- are at least 20 weeks pregnant, OR have recently given birth to your baby and have not been discharged home from postnatal ward
- are a newly arrived migrant (within the last 10 years) from a non-English speaking background; or a refugee (living in Australia for less than 10 years) from a non-English speaking background
- are 16 years of age or older.

### If I say yes, what will it involve?

If you decide to take part in the research and live in [INSERT SITE AREA] you will be in the **'FDCC Group'**. You will receive information about the child and family services in your area you can access after the birth of your baby. This information is given to all women, regardless of whether or not they participate in the study.

If you take part in the **"FDCC Group"**, you will also be contacted by a worker from the local child and family Hub who will give you more information on the services offered and assist you with accessing these services if you choose.

If you agree to take part, we will ask you to sign the Participant Information and Consent form below; OR sign the online consent found here [INSERT ONLINE CONSENT URL]; OR provide verbal consent over the telephone to the contact person for the research.

After you provide consent to take part in this research, we will ask you to:

- Complete a survey about you, your family, your support needs, and your wellbeing. This will take about 30 minutes. You can choose to do it online, by paper, over the phone, or in-person. **We can provide an interpreter to assist.**
- Complete another survey when your baby is 6 months and 12 months old. This will ask questions about you, what your needs are, and what services you have used. **We can provide an interpreter to assist.**
- We will also collect data from your local and state-wide hospital/s about you and your baby. This reduces the number of questions we need to ask you.

The data we collect from local hospitals includes:

- Information about you and your child such as country of birth, date of birth, gender, language spoken at home
- Information from routine questions asked to all women when they come to hospital about their health and wellbeing and their child's
- Information about the services you or your child has seen, for example the child and family health nurse.

The data we collect from state-wide hospitals includes:

- Information that is collected on all new mothers and babies in NSW
- Emergency Department presentations for you and your baby

**If you don't want us to collect data about you and your baby from state-wide hospitals, then we won't. Please let us know by checking the box.**

**I DO NOT want my state-wide hospital data included as part of this research**

1  
2  
3  
4 **If you only provide verbal consent, we will not collect data about you and your baby**  
5 **from state-wide hospitals.**

6 As part of this research, we may also invite you to be interviewed. We will contact you at  
7 another time to discuss this process before the research is complete.  
8  
9

10 Any information we collect that can identify you or your child will remain confidential.  
11

12 The total time you are involved with this project will be for 12 to 18 months, but you can  
13 choose to withdraw at any time.  
14

15  
16 **What if I don't want to take part in this research, or if I want to withdraw later?**

17 It is completely up to you whether or not you decide to take part. Saying yes or no will not  
18 affect your relationship with the care you receive, the services you access, or your visa  
19 status now or in the future.  
20

21 If you wish to leave the research once it has started, you can do so verbally or in writing at  
22 any time without giving a reason. However, it may not be possible to withdraw your data  
23 from the research results once we have collected it and removed your identifying details.  
24 This is due to be done from March 2023.  
25  
26

27 **How is this research being paid for?**

28 The research is being paid for by NSW Health as part of the Translational Research Grant  
29 Scheme. More information about this scheme can be found here:

30 <https://www.medicalresearch.nsw.gov.au/translational-research-grants-scheme/>  
31  
32

33 **Are there risks to me in taking part in this research?**

34 There is very little risk to you, however if you become upset or distressed because of taking  
35 part in the research, the research team will arrange for counselling or other help. Any  
36 counselling or help will be provided by qualified staff who are not members of the research  
37 team. This will be provided free of charge.  
38  
39

40 Another risk in taking part in this research is the risk to your privacy as part of collecting  
41 data about you, your child, and your family. While this is a risk, we will take all the steps to  
42 ensure your information remains private and confidential. We do not collect you or your  
43 baby's name, or anything else that could identify you or your family. Instead, your name will  
44 be replaced with a number. Only people involved with this research will be able to tell that  
45 the information is about you.  
46  
47

48 **What happens if I suffer injury or complications as a result of the research?**

49 It is very unlikely that you will suffer any injury as we are only asking you to complete  
50 questionnaires. However, if you require treatment or suffer loss as a result of the  
51 wrongdoing of any of the parties involved in the research, you can seek compensation. The  
52 cost of your treatment must be paid by the compensation you receive.  
53  
54

55 **Will I benefit from the research?**

56 This research aims to determine how best to provide child health services for families and  
57 to improve how parents in the future access child and family health services, however it  
58 may or may not directly benefit you or your baby.  
59  
60

### **Will taking part in this research cost me anything, and will I be paid?**

Taking part in this research will not cost you anything, nor will you be paid.

### **How will my confidentiality be protected?**

Any information that is collected about you as part of this research will remain private and confidential and will be discussed only with your permission, except as required by law. This means the research team are Mandatory Reporters and may need to speak with NSW Department of Communities and Justice if they are told or are concerned that a child is being hurt or is at risk of being hurt e.g. if there is abuse or violence in the home.

If such a situation happens, we would discuss this with you in private and arrange for you to speak with another professional if required.

Only the researchers named above will have access to your details. All information will be stored on a secure drive within [INSERT LHD SITES] and UNSW. We will keep the information for 5 years after the research ends. After this time, it will be destroyed.

In line with Australian, New South Wales, and other relevant laws, you have the right to access and correct the information we collect and store about you. Please contact us if you would like to access the information.

### **What happens with the results?**

If you give us your permission by providing your consent in written form, online, or verbally, we plan to publish the results in a report and in peer reviewed journals. We may also present results at professional forums and conferences to inform better ways of working and providing services.

We will also give a report on the research to the South Eastern Sydney Local Health District Human Research Ethics Committee.

In any report, publication, or presentation, information will be provided in such a way that you or your family cannot be identified.

### **What should I do if I want to discuss this research further before I decide?**

When you have read this information, the researcher interviewer/project officer will discuss it with you and answer any queries you may have. If you would like to know more at any stage, please do not hesitate to contact Tania Rimes, Principal Investigator on (02) 9382 8696 or email her at [tania.rimes@health.nsw.gov.au](mailto:tania.rimes@health.nsw.gov.au). If you need an interpreter, you can contact Tania through the Translating and Interpreting Service (TIS) on 131 450.

### **Who should I contact if I have concerns about the conduct of this research?**

This research has been approved by the South Eastern Sydney Local Health District Human Research Ethics Committee. Any person with concerns or complaints about the conduct of this research should contact the Research Support Office which is nominated to receive complaints from research participants. You should contact them on 02 9382 3587, or email [SESLHD-RSO@health.nsw.gov.au](mailto:SESLHD-RSO@health.nsw.gov.au) and quote HREC reference number: 2020/ETH03295.

The conduct of this research is at the [INSERT SITE NAMES]. Any person with concerns or complaints about the conduct of this research may also contact the [*details of the Research Governance Officer of the health district will be provided following SSA application*]

1  
2  
3  
4 **Thank you for taking the time to consider this research.**  
5 **If you wish to take part in it, please sign the attached consent form.**  
6 **This information sheet is for you to keep.**  
7  
8  
9  
10  
11  
12  
13  
14  
15  
16  
17  
18  
19  
20  
21  
22  
23  
24  
25  
26  
27  
28  
29  
30  
31  
32  
33  
34  
35  
36  
37  
38  
39  
40  
41  
42  
43  
44  
45  
46  
47  
48  
49  
50  
51  
52  
53  
54  
55  
56  
57  
58  
59  
60

For peer review only



**Primary and Community Health Directorate**

**CONSENT FORM**

**Family Care Connect – a holistic first 2000 days model of care for women and families from migrant and refugee communities.**

1. I,.....  
of.....  
agree to take part in the research described in the participant information statement set out above and to have my data linked as outlined in the information sheet.
2. I have read the participant information statement, which explains why I have been asked to take part, the aims of the research and the possible risks of the research, and the statement has been explained to me to my satisfaction.
3. Before signing this consent form, I have been able to ask any questions relating to any possible physical and mental harm I might suffer as a result of taking part and I have received satisfactory answers.
4. I understand that I can withdraw from the research at any time without affecting my relationship with South Eastern Sydney Local Health District or service at the child and family hub.
5. I agree that research information collected from the results of the research may be published and presented, provided that I cannot be identified.
6. I understand that if I have any questions relating to my participation in this research, I may contact Tania Rimes on telephone (02) 9382 8696, who will be happy to answer them. I can call 131450 (TIS) for language support.
7. I have been given a copy of this Consent Form and the Participant Information Statement.

Complaints may be directed to the Research Support Office, South Eastern Sydney Local Health District, Prince of Wales Hospital, Randwick NSW 2031 Australia (phone 02-9382 3587, fax 02-9382 2813, email [SESLHD-RSO@health.nsw.gov.au](mailto:SESLHD-RSO@health.nsw.gov.au) .

|                                 |                          |             |
|---------------------------------|--------------------------|-------------|
| <b>Signature of participant</b> | <b>Please PRINT name</b> | <b>Date</b> |
| _____                           | _____                    | _____       |
| <b>Signature of witness</b>     | <b>Please PRINT name</b> | <b>Date</b> |
| _____                           | _____                    | _____       |

1  
2  
3  
4  
5  
6  
7  
8  
9  
10  
11  
12  
13  
14  
15  
16  
17  
18  
19  
20  
21  
22  
23  
24  
25  
26  
27  
28  
29  
30  
31  
32  
33  
34  
35  
36  
37  
38  
39  
40  
41  
42  
43  
44  
45  
46  
47  
48  
49  
50  
51  
52  
53  
54  
55  
56  
57  
58  
59  
60

|                                  |                          |             |
|----------------------------------|--------------------------|-------------|
| <b>Signature of investigator</b> | <b>Please PRINT name</b> | <b>Date</b> |
| _____                            | _____                    | _____       |

Investigator/officer taking consent to complete:

  

Check box if participant DOES NOT want their state-wide hospital data included as part of this research

For peer review only

# Reporting checklist for protocol of a clinical trial.

Based on the SPIRIT guidelines.

## Instructions to authors

Complete this checklist by entering the page numbers from your manuscript where readers will find each of the items listed below.

Your article may not currently address all the items on the checklist. Please modify your text to include the missing information. If you are certain that an item does not apply, please write "n/a" and provide a short explanation.

Upload your completed checklist as an extra file when you submit to a journal.

In your methods section, say that you used the SPIRIT reporting guidelines, and cite them as:

Chan A-W, Tetzlaff JM, Gøtzsche PC, Altman DG, Mann H, Berlin J, Dickersin K, Hróbjartsson A, Schulz KF, Parulekar WR, Krleža-Jerić K, Laupacis A, Moher D. SPIRIT 2013 Explanation and Elaboration: Guidance for protocols of clinical trials. *BMJ*. 2013;346:e7586

|                                   | Reporting Item                                                                                                                  | Page Number |
|-----------------------------------|---------------------------------------------------------------------------------------------------------------------------------|-------------|
| <b>Administrative information</b> |                                                                                                                                 |             |
| Title                             | <a href="#">#1</a> Descriptive title identifying the study design, population, interventions, and, if applicable, trial acronym | 1           |
| Trial registration                | <a href="#">#2a</a> Trial identifier and registry name. If not yet                                                              | 17          |

|    |                     |                                                                         |    |
|----|---------------------|-------------------------------------------------------------------------|----|
| 1  |                     | registered, name of intended registry                                   |    |
| 2  |                     |                                                                         |    |
| 3  |                     |                                                                         |    |
| 4  | Trial registration: | <a href="#">#2b</a> All items from the World Health Organization Trial  |    |
| 5  |                     |                                                                         |    |
| 6  | data set            | Registration Data Set                                                   |    |
| 7  |                     |                                                                         |    |
| 8  |                     |                                                                         |    |
| 9  | Protocol version    | <a href="#">#3</a> Date and version identifier                          | 2  |
| 10 |                     |                                                                         |    |
| 11 |                     |                                                                         |    |
| 12 | Funding             | <a href="#">#4</a> Sources and types of financial, material, and other  | 19 |
| 13 |                     |                                                                         |    |
| 14 |                     | support                                                                 |    |
| 15 |                     |                                                                         |    |
| 16 |                     |                                                                         |    |
| 17 | Roles and           | <a href="#">#5a</a> Names, affiliations, and roles of protocol          | 19 |
| 18 |                     |                                                                         |    |
| 19 | responsibilities:   | contributors                                                            |    |
| 20 |                     |                                                                         |    |
| 21 | contributorship     |                                                                         |    |
| 22 |                     |                                                                         |    |
| 23 |                     |                                                                         |    |
| 24 |                     |                                                                         |    |
| 25 | Roles and           | <a href="#">#5b</a> Name and contact information for the trial sponsor  | 19 |
| 26 |                     |                                                                         |    |
| 27 | responsibilities:   |                                                                         |    |
| 28 |                     |                                                                         |    |
| 29 | sponsor contact     |                                                                         |    |
| 30 |                     |                                                                         |    |
| 31 | information         |                                                                         |    |
| 32 |                     |                                                                         |    |
| 33 |                     |                                                                         |    |
| 34 |                     |                                                                         |    |
| 35 | Roles and           | <a href="#">#5c</a> Role of study sponsor and funders, if any, in study | 19 |
| 36 |                     |                                                                         |    |
| 37 | responsibilities:   | design; collection, management, analysis, and                           |    |
| 38 |                     |                                                                         |    |
| 39 | sponsor and funder  | interpretation of data; writing of the report; and the                  |    |
| 40 |                     |                                                                         |    |
| 41 |                     | decision to submit the report for publication,                          |    |
| 42 |                     |                                                                         |    |
| 43 |                     | including whether they will have ultimate authority                     |    |
| 44 |                     |                                                                         |    |
| 45 |                     | over any of these activities                                            |    |
| 46 |                     |                                                                         |    |
| 47 |                     |                                                                         |    |
| 48 |                     |                                                                         |    |
| 49 | Roles and           | <a href="#">#5d</a> Composition, roles, and responsibilities of the     | 19 |
| 50 |                     |                                                                         |    |
| 51 | responsibilities:   | coordinating centre, steering committee, endpoint                       |    |
| 52 |                     |                                                                         |    |
| 53 | committees          | adjudication committee, data management team,                           |    |
| 54 |                     |                                                                         |    |
| 55 |                     | and other individuals or groups overseeing the                          |    |
| 56 |                     |                                                                         |    |
| 57 |                     |                                                                         |    |
| 58 |                     |                                                                         |    |
| 59 |                     |                                                                         |    |
| 60 |                     |                                                                         |    |

1 trial, if applicable (see Item 21a for data

2  
3 monitoring committee)

4  
5  
6 **Introduction**

7  
8  
9 Background and [#6a](#) Description of research question and justification 4  
10  
11 rationale for undertaking the trial, including summary of  
12 relevant studies (published and unpublished)

13  
14  
15  
16 examining benefits and harms for each  
17  
18 intervention

19  
20  
21 Background and [#6b](#) Explanation for choice of comparators 4  
22  
23 rationale: choice of  
24 comparators

25  
26  
27  
28 Objectives [#7](#) Specific objectives or hypotheses 5-6

29  
30  
31  
32 Trial design [#8](#) Description of trial design including type of trial 7  
33  
34 (eg, parallel group, crossover, factorial, single  
35 group), allocation ratio, and framework (eg,  
36 superiority, equivalence, non-inferiority,  
37 exploratory)

38  
39  
40  
41  
42  
43 **Methods:**

44  
45  
46 **Participants,**  
47  
48 **interventions, and**  
49  
50 **outcomes**

51  
52  
53  
54 Study setting [#9](#) Description of study settings (eg, community 6  
55  
56 clinic, academic hospital) and list of countries

|    |                      |                                                                           |                    |
|----|----------------------|---------------------------------------------------------------------------|--------------------|
| 1  |                      | where data will be collected. Reference to where                          |                    |
| 2  |                      |                                                                           |                    |
| 3  |                      | list of study sites can be obtained                                       |                    |
| 4  |                      |                                                                           |                    |
| 5  |                      |                                                                           |                    |
| 6  | Eligibility criteria | <a href="#">#10</a> Inclusion and exclusion criteria for participants. If | 6                  |
| 7  |                      |                                                                           |                    |
| 8  |                      | applicable, eligibility criteria for study centres and                    |                    |
| 9  |                      |                                                                           |                    |
| 10 |                      | individuals who will perform the interventions (eg,                       |                    |
| 11 |                      |                                                                           |                    |
| 12 |                      | surgeons, psychotherapists)                                               |                    |
| 13 |                      |                                                                           |                    |
| 14 |                      |                                                                           |                    |
| 15 |                      |                                                                           |                    |
| 16 | Interventions:       | <a href="#">#11a</a> Interventions for each group with sufficient detail  | 5,8                |
| 17 |                      |                                                                           |                    |
| 18 | description          | to allow replication, including how and when they                         |                    |
| 19 |                      |                                                                           |                    |
| 20 |                      | will be administered                                                      |                    |
| 21 |                      |                                                                           |                    |
| 22 |                      |                                                                           |                    |
| 23 | Interventions:       | <a href="#">#11b</a> Criteria for discontinuing or modifying allocated    | n/a                |
| 24 |                      |                                                                           |                    |
| 25 | modifications        | interventions for a given trial participant (eg, drug                     |                    |
| 26 |                      |                                                                           | There are no plans |
| 27 |                      |                                                                           | to discontinue or  |
| 28 |                      | dose change in response to harms, participant                             | modify the         |
| 29 |                      |                                                                           | interventions.     |
| 30 |                      | request, or improving / worsening disease)                                |                    |
| 31 |                      |                                                                           |                    |
| 32 |                      |                                                                           |                    |
| 33 |                      |                                                                           |                    |
| 34 |                      |                                                                           |                    |
| 35 |                      |                                                                           |                    |
| 36 | Interventions:       | <a href="#">#11c</a> Strategies to improve adherence to intervention      | 7                  |
| 37 |                      |                                                                           |                    |
| 38 | adherence            | protocols, and any procedures for monitoring                              |                    |
| 39 |                      |                                                                           |                    |
| 40 |                      | adherence (eg, drug tablet return; laboratory                             |                    |
| 41 |                      |                                                                           |                    |
| 42 |                      | tests)                                                                    |                    |
| 43 |                      |                                                                           |                    |
| 44 |                      |                                                                           |                    |
| 45 |                      |                                                                           |                    |
| 46 | Interventions:       | <a href="#">#11d</a> Relevant concomitant care and interventions that     | n/a                |
| 47 |                      |                                                                           |                    |
| 48 | concomitant care     | are permitted or prohibited during the trial                              |                    |
| 49 |                      |                                                                           |                    |
| 50 |                      |                                                                           |                    |
| 51 | Outcomes             | <a href="#">#12</a> Primary, secondary, and other outcomes,               | 12-15              |
| 52 |                      |                                                                           |                    |
| 53 |                      | including the specific measurement variable (eg,                          |                    |
| 54 |                      |                                                                           |                    |
| 55 |                      | systolic blood pressure), analysis metric (eg,                            |                    |
| 56 |                      |                                                                           |                    |
| 57 |                      |                                                                           |                    |
| 58 |                      |                                                                           |                    |
| 59 |                      |                                                                           |                    |
| 60 |                      |                                                                           |                    |

change from baseline, final value, time to event),  
 method of aggregation (eg, median, proportion),  
 and time point for each outcome. Explanation of  
 the clinical relevance of chosen efficacy and harm  
 outcomes is strongly recommended

|                      |                     |                                                                                                                                                                                                   |     |
|----------------------|---------------------|---------------------------------------------------------------------------------------------------------------------------------------------------------------------------------------------------|-----|
| Participant timeline | <a href="#">#13</a> | Time schedule of enrolment, interventions<br>(including any run-ins and washouts),<br>assessments, and visits for participants. A<br>schematic diagram is highly recommended (see<br>Figure)      | 7   |
| Sample size          | <a href="#">#14</a> | Estimated number of participants needed to<br>achieve study objectives and how it was<br>determined, including clinical and statistical<br>assumptions supporting any sample size<br>calculations | 15  |
| Recruitment          | <a href="#">#15</a> | Strategies for achieving adequate participant<br>enrolment to reach target sample size                                                                                                            | 6-7 |

## Methods:

### Assignment of interventions (for controlled trials)

|                                       |                      |                                                                                                                                                   |   |
|---------------------------------------|----------------------|---------------------------------------------------------------------------------------------------------------------------------------------------|---|
| Allocation:<br>sequence<br>generation | <a href="#">#16a</a> | Method of generating the allocation sequence (eg,<br>computer-generated random numbers), and list of<br>any factors for stratification. To reduce | 7 |
|---------------------------------------|----------------------|---------------------------------------------------------------------------------------------------------------------------------------------------|---|

1 predictability of a random sequence, details of any  
 2  
 3 planned restriction (eg, blocking) should be  
 4  
 5 provided in a separate document that is  
 6  
 7 unavailable to those who enrol participants or  
 8  
 9 assign interventions  
 10

11  
 12  
 13 Allocation [#16b](#) Mechanism of implementing the allocation 7

14 concealment  
 15 sequence (eg, central telephone; sequentially  
 16  
 17 mechanism numbered, opaque, sealed envelopes), describing  
 18  
 19 any steps to conceal the sequence until  
 20  
 21 interventions are assigned  
 22  
 23

24 Allocation: [#16c](#) Who will generate the allocation sequence, who 7

25 implementation  
 26 will enrol participants, and who will assign  
 27  
 28 participants to interventions  
 29  
 30

31  
 32 Blinding (masking) [#17a](#) Who will be blinded after assignment to 8

33 interventions (eg, trial participants, care providers,  
 34  
 35 outcome assessors, data analysts), and how  
 36  
 37

38  
 39  
 40 Blinding (masking): [#17b](#) If blinded, circumstances under which unblinding 8

41 emergency  
 42 is permissible, and procedure for revealing a  
 43  
 44 unblinding participant's allocated intervention during the trial  
 45  
 46

## 47 Methods: Data

48 collection,

49 management, and

50 analysis

51  
 52  
 53  
 54  
 55  
 56  
 57 Data collection plan [#18a](#) Plans for assessment and collection of outcome, 12-15



1 baseline, and other trial data, including any  
 2 related processes to promote data quality (eg,  
 3 duplicate measurements, training of assessors)  
 4 and a description of study instruments (eg,  
 5 questionnaires, laboratory tests) along with their  
 6 reliability and validity, if known. Reference to  
 7 where data collection forms can be found, if not in  
 8 the protocol  
 9  
 10  
 11  
 12  
 13  
 14  
 15  
 16  
 17  
 18

|    |                        |                      |                                                      |       |
|----|------------------------|----------------------|------------------------------------------------------|-------|
| 19 | Data collection plan:  | <a href="#">#18b</a> | Plans to promote participant retention and           | 14    |
| 20 | retention              |                      | complete follow-up, including list of any outcome    |       |
| 21 |                        |                      | data to be collected for participants who            |       |
| 22 |                        |                      | discontinue or deviate from intervention protocols   |       |
| 23 |                        |                      |                                                      |       |
| 24 |                        |                      |                                                      |       |
| 25 |                        |                      |                                                      |       |
| 26 |                        |                      |                                                      |       |
| 27 |                        |                      |                                                      |       |
| 28 |                        |                      |                                                      |       |
| 29 | Data management        | <a href="#">#19</a>  | Plans for data entry, coding, security, and storage, | 15-16 |
| 30 |                        |                      | including any related processes to promote data      |       |
| 31 |                        |                      | quality (eg, double data entry; range checks for     |       |
| 32 |                        |                      | data values). Reference to where details of data     |       |
| 33 |                        |                      | management procedures can be found, if not in        |       |
| 34 |                        |                      | the protocol                                         |       |
| 35 |                        |                      |                                                      |       |
| 36 |                        |                      |                                                      |       |
| 37 |                        |                      |                                                      |       |
| 38 |                        |                      |                                                      |       |
| 39 |                        |                      |                                                      |       |
| 40 |                        |                      |                                                      |       |
| 41 |                        |                      |                                                      |       |
| 42 |                        |                      |                                                      |       |
| 43 |                        |                      |                                                      |       |
| 44 | Statistics: outcomes   | <a href="#">#20a</a> | Statistical methods for analysing primary and        | 16    |
| 45 |                        |                      | secondary outcomes. Reference to where other         |       |
| 46 |                        |                      | details of the statistical analysis plan can be      |       |
| 47 |                        |                      | found, if not in the protocol                        |       |
| 48 |                        |                      |                                                      |       |
| 49 |                        |                      |                                                      |       |
| 50 |                        |                      |                                                      |       |
| 51 |                        |                      |                                                      |       |
| 52 |                        |                      |                                                      |       |
| 53 |                        |                      |                                                      |       |
| 54 | Statistics: additional | <a href="#">#20b</a> | Methods for any additional analyses (eg,             | 16    |
| 55 | analyses               |                      | subgroup and adjusted analyses)                      |       |
| 56 |                        |                      |                                                      |       |
| 57 |                        |                      |                                                      |       |
| 58 |                        |                      |                                                      |       |
| 59 |                        |                      |                                                      |       |
| 60 |                        |                      |                                                      |       |

|    |                            |                      |                                                   |       |
|----|----------------------------|----------------------|---------------------------------------------------|-------|
| 1  | Statistics: analysis       | <a href="#">#20c</a> | Definition of analysis population relating to     | 16    |
| 2  |                            |                      |                                                   |       |
| 3  | population and             |                      | protocol non-adherence (eg, as randomised         |       |
| 4  |                            |                      |                                                   |       |
| 5  | missing data               |                      | analysis), and any statistical methods to handle  |       |
| 6  |                            |                      |                                                   |       |
| 7  |                            |                      | missing data (eg, multiple imputation)            |       |
| 8  |                            |                      |                                                   |       |
| 9  |                            |                      |                                                   |       |
| 10 |                            |                      |                                                   |       |
| 11 | <b>Methods: Monitoring</b> |                      |                                                   |       |
| 12 |                            |                      |                                                   |       |
| 13 |                            |                      |                                                   |       |
| 14 | Data monitoring:           | <a href="#">#21a</a> | Composition of data monitoring committee (DMC);   | 16    |
| 15 |                            |                      |                                                   |       |
| 16 | formal committee           |                      | summary of its role and reporting structure;      |       |
| 17 |                            |                      |                                                   |       |
| 18 |                            |                      | statement of whether it is independent from the   |       |
| 19 |                            |                      |                                                   |       |
| 20 |                            |                      | sponsor and competing interests; and reference to |       |
| 21 |                            |                      |                                                   |       |
| 22 |                            |                      | where further details about its charter can be    |       |
| 23 |                            |                      |                                                   |       |
| 24 |                            |                      | found, if not in the protocol. Alternatively, an  |       |
| 25 |                            |                      |                                                   |       |
| 26 |                            |                      | explanation of why a DMC is not needed            |       |
| 27 |                            |                      |                                                   |       |
| 28 |                            |                      |                                                   |       |
| 29 |                            |                      |                                                   |       |
| 30 |                            |                      |                                                   |       |
| 31 | Data monitoring:           | <a href="#">#21b</a> | Description of any interim analyses and stopping  | 16    |
| 32 |                            |                      |                                                   |       |
| 33 | interim analysis           |                      | guidelines, including who will have access to     |       |
| 34 |                            |                      |                                                   |       |
| 35 |                            |                      | these interim results and make the final decision |       |
| 36 |                            |                      |                                                   |       |
| 37 |                            |                      | to terminate the trial                            |       |
| 38 |                            |                      |                                                   |       |
| 39 |                            |                      |                                                   |       |
| 40 |                            |                      |                                                   |       |
| 41 | Harms                      | <a href="#">#22</a>  | Plans for collecting, assessing, reporting, and   | 16-17 |
| 42 |                            |                      |                                                   |       |
| 43 |                            |                      | managing solicited and spontaneously reported     |       |
| 44 |                            |                      |                                                   |       |
| 45 |                            |                      | adverse events and other unintended effects of    |       |
| 46 |                            |                      |                                                   |       |
| 47 |                            |                      | trial interventions or trial conduct              |       |
| 48 |                            |                      |                                                   |       |
| 49 |                            |                      |                                                   |       |
| 50 |                            |                      |                                                   |       |
| 51 | Auditing                   | <a href="#">#23</a>  | Frequency and procedures for auditing trial       | 19    |
| 52 |                            |                      |                                                   |       |
| 53 |                            |                      | conduct, if any, and whether the process will be  |       |
| 54 |                            |                      |                                                   |       |
| 55 |                            |                      | independent from investigators and the sponsor    |       |
| 56 |                            |                      |                                                   |       |
| 57 |                            |                      |                                                   |       |
| 58 |                            |                      |                                                   |       |
| 59 |                            |                      |                                                   |       |
| 60 |                            |                      |                                                   |       |

1 **Ethics and**

2  
3 **dissemination**

|    |                    |                      |                                                        |
|----|--------------------|----------------------|--------------------------------------------------------|
| 4  |                    |                      |                                                        |
| 5  |                    |                      |                                                        |
| 6  |                    |                      |                                                        |
| 7  | Research ethics    | <a href="#">#24</a>  | Plans for seeking research ethics committee /          |
| 8  |                    |                      |                                                        |
| 9  | approval           |                      | institutional review board (REC / IRB) approval        |
| 10 |                    |                      |                                                        |
| 11 |                    |                      |                                                        |
| 12 | Protocol           | <a href="#">#25</a>  | Plans for communicating important protocol             |
| 13 |                    |                      |                                                        |
| 14 | amendments         |                      | modifications (eg, changes to eligibility criteria,    |
| 15 |                    |                      | outcomes, analyses) to relevant parties (eg,           |
| 16 |                    |                      | investigators, REC / IRBs, trial participants, trial   |
| 17 |                    |                      | registries, journals, regulators)                      |
| 18 |                    |                      |                                                        |
| 19 |                    |                      |                                                        |
| 20 |                    |                      |                                                        |
| 21 |                    |                      |                                                        |
| 22 |                    |                      |                                                        |
| 23 |                    |                      |                                                        |
| 24 | Consent or assent  | <a href="#">#26a</a> | Who will obtain informed consent or assent from        |
| 25 |                    |                      |                                                        |
| 26 |                    |                      | potential trial participants or authorised             |
| 27 |                    |                      | surrogates, and how (see Item 32)                      |
| 28 |                    |                      |                                                        |
| 29 |                    |                      |                                                        |
| 30 |                    |                      |                                                        |
| 31 |                    |                      |                                                        |
| 32 | Consent or assent: | <a href="#">#26b</a> | Additional consent provisions for collection and       |
| 33 |                    |                      |                                                        |
| 34 | ancillary studies  |                      | use of participant data and biological specimens       |
| 35 |                    |                      |                                                        |
| 36 |                    |                      | in ancillary studies, if applicable                    |
| 37 |                    |                      |                                                        |
| 38 |                    |                      |                                                        |
| 39 |                    |                      |                                                        |
| 40 |                    |                      |                                                        |
| 41 |                    |                      |                                                        |
| 42 |                    |                      |                                                        |
| 43 | Confidentiality    | <a href="#">#27</a>  | How personal information about potential and           |
| 44 |                    |                      |                                                        |
| 45 |                    |                      | enrolled participants will be collected, shared, and   |
| 46 |                    |                      |                                                        |
| 47 |                    |                      | maintained in order to protect confidentiality         |
| 48 |                    |                      |                                                        |
| 49 |                    |                      | before, during, and after the trial                    |
| 50 |                    |                      |                                                        |
| 51 |                    |                      |                                                        |
| 52 | Declaration of     | <a href="#">#28</a>  | Financial and other competing interests for            |
| 53 |                    |                      |                                                        |
| 54 | interests          |                      | principal investigators for the overall trial and each |
| 55 |                    |                      |                                                        |
| 56 |                    |                      | study site                                             |
| 57 |                    |                      |                                                        |
| 58 |                    |                      |                                                        |
| 59 |                    |                      |                                                        |
| 60 |                    |                      |                                                        |

|    |                       |                      |                                                        |                    |
|----|-----------------------|----------------------|--------------------------------------------------------|--------------------|
| 1  | Data access           | <a href="#">#29</a>  | Statement of who will have access to the final trial   | 16                 |
| 2  |                       |                      | dataset, and disclosure of contractual agreements      |                    |
| 3  |                       |                      | that limit such access for investigators               |                    |
| 4  |                       |                      |                                                        |                    |
| 5  |                       |                      |                                                        |                    |
| 6  |                       |                      |                                                        |                    |
| 7  |                       |                      |                                                        |                    |
| 8  |                       |                      |                                                        |                    |
| 9  | Ancillary and post    | <a href="#">#30</a>  | Provisions, if any, for ancillary and post-trial care, | n/a                |
| 10 | trial care            |                      | and for compensation to those who suffer harm          |                    |
| 11 |                       |                      | from trial participation                               | This is a low-risk |
| 12 |                       |                      |                                                        | trial with minimal |
| 13 |                       |                      |                                                        | foreseen harms to  |
| 14 |                       |                      |                                                        | participants.      |
| 15 |                       |                      |                                                        |                    |
| 16 |                       |                      |                                                        |                    |
| 17 |                       |                      |                                                        |                    |
| 18 |                       |                      |                                                        |                    |
| 19 |                       |                      |                                                        |                    |
| 20 |                       |                      |                                                        |                    |
| 21 |                       |                      |                                                        |                    |
| 22 | Dissemination         | <a href="#">#31a</a> | Plans for investigators and sponsor to                 | 17                 |
| 23 | policy: trial results |                      | communicate trial results to participants,             |                    |
| 24 |                       |                      | healthcare professionals, the public, and other        |                    |
| 25 |                       |                      | relevant groups (eg, via publication, reporting in     |                    |
| 26 |                       |                      | results databases, or other data sharing               |                    |
| 27 |                       |                      | arrangements), including any publication               |                    |
| 28 |                       |                      | restrictions                                           |                    |
| 29 |                       |                      |                                                        |                    |
| 30 |                       |                      |                                                        |                    |
| 31 |                       |                      |                                                        |                    |
| 32 |                       |                      |                                                        |                    |
| 33 |                       |                      |                                                        |                    |
| 34 |                       |                      |                                                        |                    |
| 35 |                       |                      |                                                        |                    |
| 36 |                       |                      |                                                        |                    |
| 37 |                       |                      |                                                        |                    |
| 38 | Dissemination         | <a href="#">#31b</a> | Authorship eligibility guidelines and any intended     | 17                 |
| 39 | policy: authorship    |                      | use of professional writers                            |                    |
| 40 |                       |                      |                                                        |                    |
| 41 |                       |                      |                                                        |                    |
| 42 |                       |                      |                                                        |                    |
| 43 |                       |                      |                                                        |                    |
| 44 | Dissemination         | <a href="#">#31c</a> | Plans, if any, for granting public access to the full  | 17                 |
| 45 | policy: reproducible  |                      | protocol, participant-level dataset, and statistical   |                    |
| 46 |                       |                      | code                                                   |                    |
| 47 |                       |                      |                                                        |                    |
| 48 |                       |                      |                                                        |                    |
| 49 |                       |                      |                                                        |                    |
| 50 |                       |                      |                                                        |                    |
| 51 | <b>Appendices</b>     |                      |                                                        |                    |
| 52 |                       |                      |                                                        |                    |
| 53 |                       |                      |                                                        |                    |
| 54 | Informed consent      | <a href="#">#32</a>  | Model consent form and other related                   | Supp. file         |
| 55 | materials             |                      | documentation given to participants and                |                    |
| 56 |                       |                      |                                                        |                    |
| 57 |                       |                      |                                                        |                    |
| 58 |                       |                      |                                                        |                    |
| 59 |                       |                      |                                                        |                    |
| 60 |                       |                      |                                                        |                    |

1 authorised surrogates

2  
3  
4 Biological [#33](#) Plans for collection, laboratory evaluation, and n/a  
5  
6 specimens storage of biological specimens for genetic or  
7 No biological  
8 molecular analysis in the current trial and for  
9 specimens will be  
10 future use in ancillary studies, if applicable  
11 collected as part of  
12  
13 this trial.  
14  
15

16  
17 None The SPIRIT Explanation and Elaboration paper is distributed under the terms of the Creative  
18 Commons Attribution License CC-BY-NC. This checklist can be completed online using  
19 <https://www.goodreports.org/>, a tool made by the [EQUATOR Network](#) in collaboration with  
20  
21 [Penelope.ai](#)  
22  
23  
24  
25  
26  
27  
28  
29  
30  
31  
32  
33  
34  
35  
36  
37  
38  
39  
40  
41  
42  
43  
44  
45  
46  
47  
48  
49  
50  
51  
52  
53  
54  
55  
56  
57  
58  
59  
60

# BMJ Open

## Study protocol for a real-world evaluation of an integrated child and family health hub for migrant and refugee women

|                                 |                                                                                                                                                                                                                                                                                                                                                                                                                                                                                                                                                                                                                                                                                                                                                                                                                                                                                                                                                                                                                                                                                                                                                                                                                                                   |
|---------------------------------|---------------------------------------------------------------------------------------------------------------------------------------------------------------------------------------------------------------------------------------------------------------------------------------------------------------------------------------------------------------------------------------------------------------------------------------------------------------------------------------------------------------------------------------------------------------------------------------------------------------------------------------------------------------------------------------------------------------------------------------------------------------------------------------------------------------------------------------------------------------------------------------------------------------------------------------------------------------------------------------------------------------------------------------------------------------------------------------------------------------------------------------------------------------------------------------------------------------------------------------------------|
| Journal:                        | <i>BMJ Open</i>                                                                                                                                                                                                                                                                                                                                                                                                                                                                                                                                                                                                                                                                                                                                                                                                                                                                                                                                                                                                                                                                                                                                                                                                                                   |
| Manuscript ID                   | bmjopen-2022-061002.R2                                                                                                                                                                                                                                                                                                                                                                                                                                                                                                                                                                                                                                                                                                                                                                                                                                                                                                                                                                                                                                                                                                                                                                                                                            |
| Article Type:                   | Protocol                                                                                                                                                                                                                                                                                                                                                                                                                                                                                                                                                                                                                                                                                                                                                                                                                                                                                                                                                                                                                                                                                                                                                                                                                                          |
| Date Submitted by the Author:   | 11-Aug-2022                                                                                                                                                                                                                                                                                                                                                                                                                                                                                                                                                                                                                                                                                                                                                                                                                                                                                                                                                                                                                                                                                                                                                                                                                                       |
| Complete List of Authors:       | Hodgins, Michael; UNSW,<br>Ostojic, Katarina; University of New South Wales<br>Hu, Nan; UNSW,<br>Lawson, K; Western Sydney University<br>Samir, Nora; University of New South Wales - Randwick Campus, School of Women's and Children's Health<br>Webster, Amanda; South Eastern Sydney Local Health District<br>Rogers, Helen; South Eastern Sydney Local Health District,<br>Henry, Amanda ; University of New South Wales Faculty of Medicine, Women's and Children's Health<br>Murphy, Elisabeth; University of New South Wales; New South Wales Ministry of Health<br>Lingam, Raghu; University of New South Wales<br>Raman, Shanti; University of New South Wales School of Women's and Children's Health, ; South Western Sydney Local Health District, Community Paediatrics<br>Mendoza Diaz , Antonio; University of New South Wales, Discipline of Psychiatry<br>Dadich, Ann; Western Sydney University, School of Business<br>Eapen, Valsamma; South Western Sydney Local Health District, ICAMHS; University of New South Wales, School of Psychiatry<br>Rimes, Tania; South Eastern Sydney Local Health District, Child Youth and Family Services<br>Woolfenden, Susan ; University of New South Wales; Sydney Local Health District |
| <b>Primary Subject Heading</b>: | Public health                                                                                                                                                                                                                                                                                                                                                                                                                                                                                                                                                                                                                                                                                                                                                                                                                                                                                                                                                                                                                                                                                                                                                                                                                                     |
| Secondary Subject Heading:      | Paediatrics, Health services research, Research methods                                                                                                                                                                                                                                                                                                                                                                                                                                                                                                                                                                                                                                                                                                                                                                                                                                                                                                                                                                                                                                                                                                                                                                                           |
| Keywords:                       | Community child health < PAEDIATRICS, Maternal medicine < OBSTETRICS, Organisation of health services < HEALTH SERVICES ADMINISTRATION & MANAGEMENT, PAEDIATRICS, PUBLIC HEALTH                                                                                                                                                                                                                                                                                                                                                                                                                                                                                                                                                                                                                                                                                                                                                                                                                                                                                                                                                                                                                                                                   |
|                                 |                                                                                                                                                                                                                                                                                                                                                                                                                                                                                                                                                                                                                                                                                                                                                                                                                                                                                                                                                                                                                                                                                                                                                                                                                                                   |

1  
2  
3  
4  
5  
6  
7  
8  
9  
10  
11  
12  
13  
14  
15  
16  
17  
18  
19  
20  
21  
22  
23  
24  
25  
26  
27  
28  
29  
30  
31  
32  
33  
34  
35  
36  
37  
38  
39  
40  
41  
42  
43  
44  
45  
46  
47  
48  
49  
50  
51  
52  
53  
54  
55  
56  
57  
58  
59  
60



1  
2  
3  
4  
5 **TITLE:** Study protocol for a real-world evaluation of an integrated child and family  
6 health hub for migrant and refugee women  
7  
8  
9

10  
11 **AUTHORS:** Michael Hodgins<sup>1</sup>, Katarina Ostojic<sup>1</sup>, Nan Hu<sup>1</sup>, Kenny Lawson<sup>2</sup>, Nora Samir<sup>1</sup>,  
12 Amanda Webster<sup>3</sup>, Helen Rogers<sup>3</sup>, Amanda Henry<sup>1</sup>, Elisabeth Murphy<sup>4</sup>,  
13 Raghu Lingam<sup>1,5</sup>, Shanti Raman<sup>6</sup>, Antonio Mendoza Diaz<sup>1</sup>, Ann Dadich<sup>2</sup>,  
14 Valsamma Eapen<sup>1,6</sup>, Tania Rimes<sup>3\*</sup>, Sue Woolfenden<sup>1,7\*</sup>  
15

16 On behalf of the FDCC Collaborative Group  
17

### 18 **AFFILIATIONS**

19  
20 <sup>1</sup> University of New South Wales, NSW 2751

21  
22 <sup>2</sup> Western Sydney University, NSW 2150

23  
24 <sup>3</sup> South Eastern Sydney Local Health District, NSW 2229

25  
26 <sup>4</sup> North Sydney Local Health District, NSW 2065

27  
28 <sup>5</sup> Sydney Children's Hospitals Network, Sydney, NSW, 2031

29  
30 <sup>6</sup> South Western Sydney Local Health District, NSW 2170

31  
32 <sup>7</sup> Sydney, Institute for Women, Children and their Families, Sydney Local Health District, NSW  
33 2050  
34

### 35 **CORRESPONDING AUTHORS\***

36  
37 Dr Michael Hodgins

38  
39 School of Women's & Children's Health

40  
41 UNSW

42  
43 Email: [michael.hodgins1@unsw.edu.au](mailto:michael.hodgins1@unsw.edu.au)  
44  
45  
46  
47

48  
49 **KEYWORDS** Integrated care, community child health, maternal health, organisation of health  
50 services, paediatrics, public health  
51  
52  
53

54  
55  
56  
57  
58  
59  
60  
1



1  
2  
3  
4  
5  
6  
7  
8  
9  
10  
11  
12  
13  
14  
15  
16  
17  
18  
19  
20  
21  
22  
23  
24  
25  
26  
27  
28  
29  
30  
31  
32  
33  
34  
35  
36  
37  
38  
39  
40  
41  
42  
43  
44  
45  
46  
47  
48  
49  
50  
51  
52  
53  
54  
55  
56  
57  
58  
59  
60

**WORD COUNTS**

Abstract: 299 words

Main text: 3,976 words (excluding title page, tables, and references)

**Protocol version:** version 1.0 (10.01.2022)

For peer review only

## ABSTRACT

**Introduction:** Continuity of child and family healthcare is vital for optimal child health and development for developmentally vulnerable children. Migrant and refugee communities are often at-risk of poor health outcomes, facing barriers to health service attendance including cultural, language, limited health literacy, discrimination, and unmet psychosocial needs. ‘Integrated health-social care hubs’ are physical hubs where health and social services are co-located, with shared referral pathways and care navigation.

**Aim:** Our study will evaluate the impact, implementation, and cost-benefit of the First 2000 Days Care Connect (FDCC) integrated hub model for pregnant migrant and refugee women and their infants.

**Materials and methods:** This study has three components. Component 1 is a non-randomised controlled trial to compare the FDCC model of care with usual care. This trial will allocate eligible women to intervention and control groups based on their proximity to the Hub sites. Outcome measures include: the proportion of children attending child and family health (CFH) nurse services and completing their CFH checks to 12 months of age; improved surveillance of growth and development in children up to 12 months, post-partum; improved breastfeeding rates; reduced emergency department presentations; and improve maternal wellbeing. These will be measured using linked medical record data and surveys. Component 2 will involve a mixed-method implementation evaluation to clarify how and why FDCC was implemented within the sites to inform future roll-out. Component 3 is a within-trial economic evaluation from a healthcare perspective to assess the cost-effectiveness of the Hubs relative to usual care and the implementation costs if Hubs were scaled and replicated.

**Ethics and dissemination:** Ethical approval was granted by the South Eastern Sydney Local Health District Human Research Ethics Committee in July 2021 (Project ID: 020/ETH03295). Results will be submitted for publication in peer-reviewed journals and presented at relevant conferences.

**Trial registration:** ACTRN12621001088831

## ARTICLE SUMMARY

### Strength and limitations

- The study has an embedded implementation evaluation and economic evaluation in addition to the non-randomised trial component of the study.
- A strength of the design of the study is the logic modelling process used to map the implementation context and intervention components to guide data collection methods.
- A strength of the design of the implementation evaluation is a mixed methods approach that will enable the triangulation of barriers and facilitators to implementing hubs with implementation success across the sites qualitatively and quantitatively.
- The non-randomised design of the trial has some limitations, particularly the inability to guarantee the comparability of the intervention and control groups.

### BACKGROUND AND RATIONALE

In New South Wales (NSW), Australia, 25% of children from migrant and refugee families are 'developmentally vulnerable'.<sup>1</sup> Developmental vulnerability is measured by the Australian Early Development Census across five domains including physical health and wellbeing, social competence, emotional maturity, language and cognitive skills, and communication skills and general knowledge. Children who are in the lowest 10 per cent of the national population are classified as developmentally 'vulnerable'.<sup>1</sup> Developmental vulnerability is associated with undetected maternal postnatal depression, the early cessation of breastfeeding<sup>2</sup>, and parental unmet psychosocial needs (e.g., housing, domestic violence).<sup>3,4</sup> Children who are developmentally vulnerable are twice as likely to struggle at school, experience adverse childhood events and have poorer long-term health outcomes and higher healthcare costs.<sup>1, 5-12</sup> These adverse childhood events can continue into adulthood, contributing up to 44% of adult morbidity.<sup>13,14</sup>

Continuity of care with regular child and family health (CFH) checks by local health district (LHD) employed child and family health nurses (CFHN) are the foundation for optimal child health and development. This is particularly the case for priority populations, including newly arrived migrant and refugee women, children, and their families.<sup>5</sup> However, these populations also experience

1  
2  
3 significant barriers to services including cultural, language, limited health literacy, discrimination,  
4 and unmet psychosocial needs.<sup>15-31</sup> Families with greater disadvantage are at greater risk of  
5 developmental vulnerability and poorer maternal mental health and other health problems. These  
6 families are less likely to engage with health services, particularly health promotion programs, like  
7 CFH checks.<sup>2-4 15 32-36</sup>

8  
9  
10  
11  
12 Australian policymakers identified service areas that need improvement to optimise outcomes in the  
13 first 2,000 days of a child's life.<sup>5 37</sup> These include the transition from maternity to CFH services;  
14 increasing uptake and length of time families stay connected with CFH services; and supporting  
15 priority populations. Unfortunately, in NSW, two-thirds of children stop attending CFH services by  
16 12 months of age,<sup>15 18-20</sup> further fragmenting care.

### 21 **Benefits of integrated health-social care hubs**

22  
23  
24 To address the fragmented CFH services for priority populations, integrated health-social care hubs  
25 were established in multiple jurisdictions across Australia. These are physical hubs where health and  
26 social services are co-located, supported by care navigators and shared referral pathways.<sup>38 39</sup> Co-  
27 location and navigation support aims to remove barriers that hinder engagement between families  
28 and CFH services. However, the evidence-base for their effectiveness is limited. Our recent  
29 systematic review demonstrated the dearth of experimental trial evidence in Australia regarding  
30 physical CFH Hubs.<sup>40</sup> Yet, individual studies have found Hub models increase access to CFH  
31 services and the identification of developmental vulnerability.<sup>40</sup> Additionally, a recent scoping  
32 review of models of care across the continuum of pregnancy, birth, and the postpartum period for  
33 women from migrant and refugee backgrounds in high-income countries highlighted an evidence gap  
34 for models that improved maternal and child infant health outcomes.<sup>8</sup>

35  
36  
37  
38  
39  
40  
41  
42  
43 We have extended this evidence-base by showing the feasibility and efficacy of integrated CFH  
44 hubs and cross-cultural workers (CCW) models in South Eastern Sydney.<sup>8 41-43</sup> These models support  
45 women and families to navigate maternity, CFH, and community-based services, providing  
46 continuity of care across the continuum of pregnancy and transition to CFH. The pilot interventions  
47 demonstrated that, for women and families from migrant and refugee populations: CFHN services  
48 embedded in integrated hubs increased the completion rate of CFH checks from 30% to 60% at 12-

53  
54 5

1  
2  
3 months and facilitated linkage with co-located non-government organisations.<sup>41 42</sup> Cross-cultural  
4 worker support in pregnancy was also highly rated by staff and pregnant women regarding support  
5 for pregnancy and linkage with services.<sup>44 45</sup>  
6  
7

### 8 9 **Current study: First 2000 Days Care Connect**

10  
11 *First 2000 Days Care Connect* (FDCC) is an integrated health-social care hub model that builds on  
12 these feasible and acceptable pilot interventions. The FDCC model involves co-located CFH services  
13 and non-government organisations (NGO), including psychosocial support services (e.g., playgroups,  
14 domestic violence support, mental health support, early childhood education, family support). These  
15 services operate from a physical location to facilitate service collaboration, integration, and a  
16 community-led approach to local needs. This Hub is supported by care navigation, increasing  
17 continuity from maternity to CFH services.  
18  
19  
20  
21  
22

### 23 24 **Objectives**

25  
26 The overall aim of the FDCC study is to evaluate: the impact of FDCC (an integrated CFH Hub) on  
27 attendance at CFHN services and completion of CFH checks, support of child growth and  
28 development, breastfeeding and maternal wellbeing, and meeting family psychosocial needs  
29 (Component 1); the process of implementing FDCC (Component 2); and the cost-effectiveness of  
30 FDCC (Component 3).  
31  
32  
33  
34

## 35 36 **METHODS AND ANALYSIS**

### 37 38 **Study Setting**

39  
40 FDCC is a multisite study, conducted across three metropolitan LHDs in Greater Sydney, NSW –  
41 namely, SESLHD, SWSLHD, and NSLHD. Participants will be recruited from public and  
42 universally available antenatal services at participating public hospitals within the LHDs and receive  
43 services from CFHN services within each LHD.  
44  
45  
46

### 47 48 **Recruitment and Consent**

49  
50 The study will recruit 240 women between November 2021 and April 2022. Eighty participants will  
51 be enrolled within SESLHD, NSLHD, and SWSLHD, with 40 allocated to the intervention arm  
52  
53

54  
55  
56  
57  
58  
59  
60  
6

(FDCC Hub) and 40 to the control arm (routine care). Potential participants are women attending antenatal clinics at the participating public hospitals within each study site and fulfilling the eligibility criteria (Table 1).

*Table 1: Inclusion and Exclusion Criteria*

| Inclusion criteria                                                                                                                                                                                                                                                                                                                                                                                                                                                                                                                                                                        | Exclusion criteria                                                                                                                                                                                                                                                                                                                                                                                                                                                                                                                                                                                 |
|-------------------------------------------------------------------------------------------------------------------------------------------------------------------------------------------------------------------------------------------------------------------------------------------------------------------------------------------------------------------------------------------------------------------------------------------------------------------------------------------------------------------------------------------------------------------------------------------|----------------------------------------------------------------------------------------------------------------------------------------------------------------------------------------------------------------------------------------------------------------------------------------------------------------------------------------------------------------------------------------------------------------------------------------------------------------------------------------------------------------------------------------------------------------------------------------------------|
| <p>Eligible women will be expectant mothers who are:</p> <ul style="list-style-type: none"> <li>• Attending antenatal clinics linked to the three study sites</li> <li>• Residing in geographical catchment for the respective antenatal clinic</li> <li>• Expectant mother &gt; 20 weeks gestation</li> <li>• 16 years of age or older at enrolment</li> <li>• Newly arrived migrant (&lt; 10 years in Australia) or self-identified refugee (&lt; 10 years in Australia), from a non-English speaking background</li> <li>• Provide a signed and dated informed consent form</li> </ul> | <ul style="list-style-type: none"> <li>• Does not comprehend the recruitment invitation (not proficient in English and/or declines the offer of an interpreter in their home language)</li> <li>• Have no mechanism for contact (telephone or email)</li> <li>• Already an active client in other targeted support services</li> <li>• Less than 16 years of age at enrolment</li> <li>• Migrant &gt; 10 years in Australia or self-identified refugee &gt; 10 years in Australia,</li> <li>• From an English speaking background</li> <li>• Not residing in geographical area of study</li> </ul> |

Using three processes, midwives and CCWs (where available) will identify eligible women attending antenatal services at the intervention sites during regular consultations. The processes include: midwives and CCW introduce the project to women attending a group model of antenatal care; midwives will promote the study during individual hospital antenatal visits and provide potential participants a flyer; and midwives will identify potential participants who meet the eligibility criteria and provide study details during regular antenatal visits. If potential participants provide verbal consent, they will be introduced to the project officer. The project officer will explain the study and provide a participant information sheet and consent form (PISCF) using translated documents and/or interpreter services, if required. They will confirm eligibility at face-to-face clinic visits or via telephone consultation. If the woman is not interested in the study, there will be no further contact regarding the study.

Participants will provide informed consent via completing paper-based consent forms, via email or verbally via phone or via online electronic signature option using the RedCap database. Participants consenting to the study can opt out of the data linkage component.

7

1  
2  
3 For component 2, once the FDCC trial is underway, the project implementation scientist will contact  
4 participating CFHNs, NGO staff, and Hub administrative staff via telephone and/or email to invite  
5 them to an interview or focus group. Prior to the interviews and focus groups, the implementation  
6 researcher will describe the study to participants and its rationale, providing a PISCF, and obtain  
7 informed consent. Hub staff and service leaders, including LHD partners and policymakers, will be  
8 invited to complete a 32-item online survey at the completion of *Component 1*. The online survey  
9 will include a detailed description of the study, rationale, and an opportunity to indicate informed  
10 consent before survey completion. Hub staff and managers who do not complete the survey will  
11 receive a reminder thrice via email.  
12  
13  
14  
15  
16  
17  
18

### 19 **Study Procedures**

20  
21 This protocol has used the SPIRIT reporting guidelines.<sup>46</sup> Following the identification of potential  
22 participants, project officers will confirm participant eligibility as part of the consent process. This is  
23 a non-randomised study whereby eligible participants will be allocated to a study arm (FDCC  
24 intervention or control group) based on their residential postcode at the time of enrolment (see  
25 below). Participation will be 12 months, including: intervention allocation; intervention delivery (12  
26 months); and data collection (baseline, 6 months post-partum, 12 month post-partum). In addition to  
27 English, the study materials will be translated in the six most common community languages  
28 (Arabic, Bengali, Simplified Chinese, Korean, Hindi, and Vietnamese).  
29  
30  
31  
32  
33  
34

#### 35 *Allocation, Concealment, and Implementation*

36  
37 Women attending antenatal services from the participating hospitals who live in a defined  
38 geographic area (postcode) served by an established CFH Hub in their LHD will be allocated to the  
39 FDCC intervention group. Women attending antenatal services from the participating hospitals but  
40 do not live in the defined geographic area above will be in the control group.  
41  
42  
43  
44

#### 45 *Blinding*

46  
47 Given the nature of the study, blinding to group allocation is impractical. However, as the  
48 intervention is dependent on participant postcode of residence, there is expected to be minimal  
49 treatment contamination between the intervention and control groups. To assess for intervention  
50 contamination, women in all groups will be asked at the 12 months postpartum assessment regarding  
51  
52  
53  
54  
55  
56  
57  
58  
59  
60

1  
2  
3 the use of any Hub and CFHN service. While the site project officers collecting survey data at each  
4 site will not be blinded to allocation, the researcher analysing data will be blinded to group  
5 allocation.  
6  
7

### 8 9 *Intervention*

10  
11 After recruitment, the Hub navigator or key worker (i.e. an individual based at the hub responsible  
12 for linking participants with services, usually the CFHN) will contact participants to introduce Hub  
13 services and support engagement with identified services, if needed. This will be followed by another  
14 contact between birth and 8 weeks postpartum. Following mothers' and infants' discharge from  
15 birthing services, women will access CFH services via the Hub, as well as psychosocial support  
16 services suited to maternal needs and preferences. Per routine care, all women and their babies will  
17 be offered an appointment (approximately 1 hour) with a CFHN at 1 to 4 weeks postpartum, 6 to 8  
18 weeks postpartum, 6 months postpartum, and 12 months postpartum.  
19  
20  
21  
22  
23  
24

25 Hub services will be face-to-face, online, and one-to-one. Some services, such as playgroup or  
26 mothers' groups, might be in a group setting. Mothers and their babies will have access to the Hub  
27 for 12 months. Further contacts with the Hub navigator or keyworker as participants require.  
28  
29

30  
31 The integrated FDCC Hubs are a physical building and a way of working, facilitating service  
32 collaboration, integration, and a community-led approach to local needs. Hubs most commonly  
33 operate from a host building from which partner community-based or public services are delivered.  
34 In our Hub model, CFH services are co-located with NGOs. Families are linked with psychosocial  
35 support services, including playgroups, early childhood learning opportunities, and family support.  
36 Within the Hub services, existing CFH and NGO services support families to navigate systems and  
37 engage with other health services. These include general practitioners, early childhood, education,  
38 and psychosocial support to address their needs.  
39  
40  
41  
42  
43  
44

### 45 *Control Arm: Routine Care*

46  
47 Pregnant women attending the participating hospitals who meet eligibility criteria but do not live in  
48 the geographic area will be allocated to a control cohort and receive routine care (e.g., receive  
49 information on CFHN services at discharge and follow-up as per current pathways).  
50  
51  
52  
53

54 9  
55  
56  
57  
58  
59  
60



## Implementation Evaluation

Our mixed-methods implementation evaluation will assess the barriers and facilitators to implementing the FDCC Hubs at the three sites, as guided by the consolidated framework for implementation research (CFIR).<sup>47</sup> The CFIR is a comprehensive framework designed to ‘offer an overarching typology to promote implementation theory development and verification about what works where and why across multiple contexts’.<sup>47</sup> The CFIR is widely used in diverse healthcare contexts, including primary care.<sup>48</sup> The CFIR identifies five major domains and guides the consideration and assessment of factors that can impact intervention implementation and effectiveness. Additionally, the researchers will evaluate specific implementation outcomes of acceptability, appropriateness, fidelity to the implementation strategy, coverage, sustainability, and cost (Table 2) as guided by the taxonomy proposed by Proctor and colleagues.<sup>49</sup>

*Table 2: Proctor and colleagues (2011) implementation outcomes mapped to FDCC evaluation*

|                 | Questions addressed by each implementation factor                                |
|-----------------|----------------------------------------------------------------------------------|
| Acceptability   | Do Hub staff and families view the Hub model as acceptable?                      |
| Adoption        | Do Hub staff intend to apply the Hub model as described in the study protocol?   |
| Appropriateness | Do Hub staff perceive the Hub model as relevant & useful for their services?     |
| Fidelity        | Is the Hub model applied as intended?                                            |
| Coverage        | How many eligible families are reached through the Hub model and keyworker?      |
| Cost            | How much does it cost to implement Hubs?                                         |
| Sustainability  | What are the factors that will allow the Hubs to be sustained/scaled-up further? |

### *Logic Model*

We developed a logic model to inform the FDCC implementation evaluation (**Error! Reference source not found.**). We used a modified version of existing logic model frameworks<sup>50 51</sup> to include the inner context (i.e., individual factors, organisational settings) and the outer context of each site (i.e., area demographics, policy climate, relevant geographically adjacent clinical services). These contextual factors were incorporated within the logic modelling to enable implementation researchers to better describe the determinants of successful implementation in clinical practice.<sup>52</sup>

[INSERT FIGURE 1]

Additionally, we included a detailed description of the intervention to identify feasibility elements to measure during the study. These include features of the physical location of services, how services are integrated, the availability of culturally sensitive support materials and services, and the

10

1  
2  
3 navigator or keyworker. To supplement the practical elements of the intervention, we described the  
4 underlying theoretical principles of the model. These include the collective impact framework<sup>53</sup> and  
5 the elements of the behaviour change wheel that we perceived the model to adhere.<sup>54</sup> Collective  
6 impact is designed to inform change on complex social issues, and draws on five conditions:  
7 common agenda; continuous communication; mutually reinforcing activities; backbone support; and  
8 shared measurement.<sup>55</sup> Collective impact and the behavioural change wheel mechanisms of change  
9 within the logic model will inform the qualitative interview schedule. Finally, we drew connections  
10 from these underlying theories of change to the specific intermediate and long-term outcomes that  
11 we hypothesised the model will produce. Principally, we hypothesise that the intervention  
12 components will work on the core principles of environmental restructure, enablement, modelling,  
13 and training within the Hub sites, underpinned by the collective impact principles to support migrant  
14 and refugee parents to engage with health and social support services. This engagement will provide  
15 better outcomes for children and families. It will also create opportunities for shared knowledge  
16 between health and non-health services, as part of an acceptable and cost-effective model delivery.  
17 Table 3 provides an overview of the planned outcomes and measurement for the implementation  
18 evaluation.

19  
20  
21  
22  
23  
24  
25  
26  
27  
28  
29  
30  
31  
32  
33  
34  
35  
36  
37  
38  
39  
40  
41  
42  
43  
44  
45  
46  
47  
48  
49  
50  
51  
52  
53  
54  
55  
56  
57  
58  
59  
60  
*Table 3: Overview of the Implementation Evaluation Outcomes*

| <b>Implementation Evaluation Outcomes</b> |                                                                                  |                                                                                  |                          |
|-------------------------------------------|----------------------------------------------------------------------------------|----------------------------------------------------------------------------------|--------------------------|
| <b>Outcome measure</b>                    | <b>Data Source</b>                                                               | <b>Methods</b>                                                                   | <b>Data Collection</b>   |
| Description of local context and Hub      | SEIFA data, search of grey literature, informal contact with Hub service leaders | SEIFA data, search of grey literature, informal contact with Hub service leaders | Trial commencement       |
| Fidelity of Hub Model                     | Hub intervention log                                                             | A bespoke log completed by site project officers                                 | Ongoing during the trial |

|                                                                                                                                                      |                                                                                    |                                                                                                            |                                                                                                          |
|------------------------------------------------------------------------------------------------------------------------------------------------------|------------------------------------------------------------------------------------|------------------------------------------------------------------------------------------------------------|----------------------------------------------------------------------------------------------------------|
| Acceptability of intervention measure (AIM), intervention appropriateness measure (IAM), and feasibility of intervention measure (FIM) <sup>56</sup> | Research survey administered by project officer                                    | AIM, IAM, and FIM measures completed by Hub staff, service leaders, participants in the intervention group | Trial end (included in the 12-month postpartum parent survey for parents and separate staff survey)      |
| Barriers and facilitators to running the FDCC Hubs                                                                                                   | Interviews with Hub staff, service leaders, participants in the intervention group | Qualitative interviews and focus groups, guided by the CFIR                                                | Pre-trial (with Hub staff and service leaders). Ongoing during and end of the trial for all participants |
| The NoMAD tool <sup>57</sup> to assess Hub staff buy in to the model                                                                                 | Research survey administered by project officer                                    | NoMAD tool completed by Hub staff                                                                          | Trial end                                                                                                |

## Economic Evaluation

The economic evaluation will adopt a healthcare perspective beginning with a cost consequence analysis to describe the costs and all main study outcome measures (tables 4 and 5) and then generate a cost-utility analysis. The costs of Hub implementation will include: the establishment and operation of Hubs; and the flow-on cost from service use from Hub referrals. Hubs are likely to be implemented in different ways relative to local context and, as such, costs might differ. Two bespoke costing templates will be shared with Hub managers upon trial commencement to be completed at 6 and 12 months, with researcher support to ensure accuracy. The templates will allow for standardisation and between-site comparison.

### *Establishment and Operational Costs*

A micro-costing approach will be adopted to account for funded and in-kind expenditures.<sup>58 59</sup> A simple template will have major generic expenditure categories, including upfront capital costs (e.g., vehicles, buildings), governance arrangements to manage the Hubs (e.g., staff meeting time), material costs (e.g., brochures), and in-kind support from staff, including partner agencies. There

12

might be expenditures against these categories. At this stage, there is no plan for capital expenditures. This is included for completeness. Operational costs pertain to daily Hub operation, including new staff hired (e.g., salary, on-costs), in-kind costs (e.g., time costs from non-salaried staff), venue costs (e.g., utilities, even if in-kind), and material costs (e.g., brochures).

### *Referral Costs*

Prior to Hub commencement, Hub personnel will be asked for a list of service partners to create a template where clients will be asked the services accessed and frequency; clients will be surveyed using this. Other sites will follow suit. Full client recall is not anticipated. However, it is important that the study clarifies the impact on referral services, if possible. A top-down costing estimate will then be made.<sup>58 59</sup> Each partner service will then be contacted to generate an estimate of the average client service cost. Providers typically adopt an activity-based costing approach in accounting and funding proposals. No specific client data will be accessed. Rather, the researchers will guide service providers to generate average costs, which typically only involves dividing total funding for service(s) by total occasions of service. Researchers will only be privy to the overall average costs. Where costs are unavailable, an approximation will be made if public and research data are available. Otherwise, a list of service counts only will be made and remain un-costed. Table 4 provides an overview of the planned outcomes and measurement for the implementation evaluation.

*Table 4: Overview of the Economic Evaluation Outcomes*

| <b><i>Economic Evaluation Outcomes</i></b>      |                                                 |                                                                                       |                                                                                         |
|-------------------------------------------------|-------------------------------------------------|---------------------------------------------------------------------------------------|-----------------------------------------------------------------------------------------|
| <b>Outcome measure</b>                          | <b>Data Source</b>                              | <b>Methods</b>                                                                        | <b>Data Collection</b>                                                                  |
| Mother quality of life (EQ-5D quality of life)  | Research survey administered by project officer | Research survey administered by project officer. EQ-5D quality of life questionnaire. | Baseline (antenatal time of enrolment)<br>6 months post-partum<br>12 months post-partum |
| Cost of implementing Hubs and referral services | Bespoke surveys                                 | Bespoke surveys completed by Hub Staff and Participants in the intervention group     | 6 and 12 months<br>6 and 12 months                                                      |

### **Primary and Secondary Outcome Measures**

13

Outcomes will be measured from enrolment (baseline) until and including 12 months post-partum (Table 5). Outcomes will be gathered via: the extraction of routinely collected clinical data from electronic medical records at each site or LHD; surveys administered by a researcher to mothers; and data linkage of participants with administrative datasets (NSW perinatal data collection, NSW emergency department data collection). The primary outcome measure is the proportion of mothers and their respective infant who attend CFHN services for early childhood health checks at 1 to 4 weeks postpartum, 6-8 weeks postpartum, 6 months postpartum, and 12 months postpartum. For primary and secondary variables, see Table 5.

Table 5: Overview of the FDCC Study Outcome Variables

| <b>FDCC trial</b>                                                                                                                                             |                                  |                                                                                                                                                                                           |                                                                                                                                                                                         |
|---------------------------------------------------------------------------------------------------------------------------------------------------------------|----------------------------------|-------------------------------------------------------------------------------------------------------------------------------------------------------------------------------------------|-----------------------------------------------------------------------------------------------------------------------------------------------------------------------------------------|
| <b>Outcome measure</b>                                                                                                                                        | <b>Data Source</b>               | <b>Methods</b>                                                                                                                                                                            | <b>Data Collection</b>                                                                                                                                                                  |
| Proportion of mothers, children and families who attend CFHN at FDCC Hub for checks ( <i>Primary Outcome</i> )                                                | Electronic medical record at LHD | Extraction of routine clinical data from electronic medical record at LHD.                                                                                                                | <ul style="list-style-type: none"> <li>• 1-4 weeks post-partum</li> <li>• 6-8 weeks post-partum</li> <li>• 6 months post-partum</li> <li>• 12 months post-partum</li> </ul>             |
| Proportion of mothers, children and families who are up to date with age appropriate health checks, either via CFHN services or GP ( <i>Primary Outcome</i> ) | Electronic medical record at LHD | Extraction of routine clinical data from electronic medical record at LHD.                                                                                                                | <ul style="list-style-type: none"> <li>• 1-4 weeks post-partum</li> <li>• 6-8 weeks post-partum</li> <li>• 6 months post-partum</li> <li>• 12 months post-partum</li> </ul>             |
| Proportion of women identified as at risk of experiencing depression on the Edinburgh Depression Scale (EPDS) <sup>60</sup> ( <i>Secondary Outcome</i> )      | Electronic medical record at LHD | Extraction of routine clinical data from electronic medical. <ul style="list-style-type: none"> <li>• Edinburgh Depression Scale (EPDS) total score</li> </ul> Response to item 10 of EDS | <ul style="list-style-type: none"> <li>• Baseline (antenatal time of enrolment)</li> <li>• 1-4 weeks post-partum or by 6-8 weeks post-partum</li> <li>• 6 months post-partum</li> </ul> |

|                                                                                        |                                                                                                                                                                                                                                            |                                                 |                                                                                                                                                                                          |                                                                                                                                                                                         |
|----------------------------------------------------------------------------------------|--------------------------------------------------------------------------------------------------------------------------------------------------------------------------------------------------------------------------------------------|-------------------------------------------------|------------------------------------------------------------------------------------------------------------------------------------------------------------------------------------------|-----------------------------------------------------------------------------------------------------------------------------------------------------------------------------------------|
| 1<br>2<br>3<br>4<br>5<br>6<br>7<br>8<br>9                                              | Proportion of women identified as having more than one unmet social need on the We Care questionnaire <sup>61</sup><br>( <i>Secondary Outcome</i> )                                                                                        | Research survey administered by project officer | Research survey administered by project officer. We Care questionnaire.                                                                                                                  | <ul style="list-style-type: none"> <li>• Baseline (antenatal time of enrolment)</li> <li>• 6 months post-partum</li> <li>• 12 months post-partum</li> </ul>                             |
| 10<br>11<br>12<br>13<br>14<br>15<br>16<br>17<br>18<br>19<br>20<br>21                   | Proportion of women identified as experiencing psychosocial vulnerability on NSW Health psychosocial screening tools (Safe Start Psychosocial assessment including Domestic Violence screen) <sup>62</sup><br>( <i>Secondary Outcome</i> ) | Electronic medical record at LHD.               | Extraction of routine clinical data from electronic medical. Presence/absence of psychosocial risk factors on Safe Start Psychosocial assessment including the Domestic Violence screen. | <ul style="list-style-type: none"> <li>• Baseline (antenatal time of enrolment)</li> <li>• 1-4 weeks post-partum or by 6-8 weeks post-partum</li> <li>• 6 months post-partum</li> </ul> |
| 22<br>23<br>24<br>25<br>26<br>27<br>28                                                 | Proportion of mothers reporting poor quality of life on EQ-5D quality of life questionnaire<br>( <i>Secondary Outcome</i> )                                                                                                                | Research survey administered by project officer | Research survey administered by project officer. EQ-5D quality of life questionnaire.                                                                                                    | <ul style="list-style-type: none"> <li>• Baseline (antenatal time of enrolment)</li> <li>• 6 months post-partum</li> <li>• 12 months post-partum</li> </ul>                             |
| 29<br>30<br>31<br>32<br>33<br>34<br>35<br>36<br>37<br>38                               | Proportion of children monitored for growth parameters and their growth parameters (weight, height, head circumference)<br>( <i>Secondary Outcome</i> )                                                                                    | Electronic medical record at LHD                | Extraction of routine clinical data from electronic medical. <ul style="list-style-type: none"> <li>• height (cm)</li> <li>• weight (kg)</li> </ul> head circumference (cm)              | <ul style="list-style-type: none"> <li>• 1-4 weeks post-partum</li> <li>• 6-8 weeks post-partum</li> <li>• 6 months post-partum</li> <li>• 12 months post-partum</li> </ul>             |
| 39<br>40<br>41<br>42<br>43<br>44<br>45<br>46<br>47<br>48<br>49<br>50<br>51<br>52<br>53 |                                                                                                                                                                                                                                            |                                                 |                                                                                                                                                                                          |                                                                                                                                                                                         |

|                                                                                                                                                                                                 |                                                                                           |                                                                                                                                                                                                                                                                                                                                                                    |                                                                                                                                                                                                                                                                                                                                                   |
|-------------------------------------------------------------------------------------------------------------------------------------------------------------------------------------------------|-------------------------------------------------------------------------------------------|--------------------------------------------------------------------------------------------------------------------------------------------------------------------------------------------------------------------------------------------------------------------------------------------------------------------------------------------------------------------|---------------------------------------------------------------------------------------------------------------------------------------------------------------------------------------------------------------------------------------------------------------------------------------------------------------------------------------------------|
| <p>Proportion of women exclusively breastfeeding /predominately breastfeeding/partially breastfeeding/ artificially feeding (<i>Secondary Outcome</i>)</p>                                      | <p>Electronic medical record at LHD. Data linkage with NSW Perinatal Data Collection.</p> | <p>Extraction of routine clinical data from electronic medical.</p> <ul style="list-style-type: none"> <li>• Exclusively breastfed</li> <li>• Predominately breastfed</li> <li>• Partial breastfed</li> <li>• Artificial feeding</li> </ul>                                                                                                                        | <p>Electronic medical record at LHD:</p> <ul style="list-style-type: none"> <li>• 1-4 weeks post-partum</li> <li>• 6-8 weeks post-partum</li> <li>• 6 months post-partum</li> </ul> <p>Data linkage with NSW Perinatal Data Collection</p> <ul style="list-style-type: none"> <li>• Breast feeding initiated at discharge postnatally.</li> </ul> |
| <p>Proportion of children identified by CFHN as at developmental risk on the Learn the Signs Act Early (LtSAE) and Ages and Stages Questionnaire Screening tools (<i>Secondary Outcome</i>)</p> | <p>Electronic medical record at LHD</p>                                                   | <p>Extraction of routine clinical data from electronic medical record at LHD.</p> <ul style="list-style-type: none"> <li>• LtSAE screening completed, and the concerns/no concerns identified on LtSAE screening domains.</li> </ul> <p>Ages and Stages Questionnaire (ASQ &amp; ASQ-SE) secondary screener given to families by CFHN as clinically required .</p> | <ul style="list-style-type: none"> <li>• 6-8 weeks post-partum (LtSAE)</li> <li>• 6 months post-partum (LtSAE and ASQ)</li> </ul> <p>12 months post-partum (LtSAE and ASQ and ASQ-SE)</p>                                                                                                                                                         |
| <p>Mother and infant attendance at emergency departments from recruitment at 6-month postpartum and 12-month postpartum. (<i>Secondary Outcome</i>)</p>                                         | <p>Data linkage with NSW-wide Emergency Department Data Collection (EDDC)</p>             | <p>NSW-wide EDDC data Linkage</p>                                                                                                                                                                                                                                                                                                                                  | <p>At 6-month postpartum and 12-month postpartum.</p>                                                                                                                                                                                                                                                                                             |

## Data Analysis Plan

### *Sample Size Estimation*

Based on pilot data, we anticipate the percentage of children to have their CFH check done by a CFHN will be 60% in the intervention group and 30% in the control group. Therefore, 72 children will be needed for each arm to provide 80% of power to detect the magnitude of such an increase with a  $p$  value  $<0.05$ . Allowing for a 40% attrition rate (i.e., loss-to-follow-up) as this is a vulnerable community<sup>15</sup>, we aim to recruit 120 children in each arm or 240 children in total across the three sites.

### *Statistical Analysis*

Statistical analysis will include descriptive analysis of participating mother and child outcomes at each assessment. We will compare outcomes between the intervention and control groups using the Fisher's test for binary outcomes, Chi-square method for categorical outcomes, non-parametric method (e.g., Wilcoxon rank-sum test) and parametric methods (e.g.,  $t$ -test) for continuous and ordinal variables. As outcomes will be measured repeatedly, multilevel regression analysis will be undertaken to examine intervention impact on outcomes, controlling for the plausible confounders at the individual (e.g., mother's sociodemographic characteristics, geographic area of residence) and community levels at baseline (e.g., neighbourhood socioeconomic factors). Generalised estimating equations method will be used in the regression analysis, considering the potential clustering effect by site. Only deidentified data will be analysed. No data safety monitoring committee is needed for this study due to the known minimal risks. No interim analyses or stopping rules will be applied.

### *Implementation Evaluation Analysis*

Implementation effectiveness will be evaluated using the validated scoring system of  $-2$  to  $+2$  with score descriptions as follows:  $-2$  indicates the construct has negatively influenced the practice and examples of negative manifestations are indicated;  $-1$  indicates the construct has negatively influenced the practice and general statements of negative manifestations are made;  $0$  indicates the construct neutrally influenced the practice;  $+1$  indicates the construct positively influenced the practice and general statements of positive manifestations are made; and  $+2$  indicates the construct positively influenced the practice and explicit examples of positive manifestations are described.<sup>63</sup>

17



1  
2  
3 Using these scores, construct scores can range from a low of -80 to a high of +80, demonstrating the  
4 key barriers and facilitators to uptake and sustain the FDCC hubs. This method of quantifying  
5 implementation effectiveness will be supplemented with an inductive analysis of qualitative data to  
6 ensure openness to emerging themes not readily captured by the CFIR and Proctor and colleague's  
7 outcome measures.<sup>49</sup>  
8  
9

### 10 11 12 *Economic Analysis* 13

14 First, a cost consequence analysis will collate and list the main costs and outcomes from the trial  
15 (table 4 and 5) to provide transparency regarding the overall impacts of Hubs. Second, a cost-utility  
16 will then report the incremental (net) cost per change in quality adjusted life years (QALYs) (with  
17 health utilities derived from the EQ5D)<sup>64</sup> simulated using a decision tree, and where the threshold  
18 willingness to pay is varied between \$42,000-\$67,000.<sup>65</sup> Third, a probability sensitivity analysis  
19 (PSA) will be undertaken and, where there is statistical uncertainty regarding cost effectiveness, a  
20 value of information analysis (VOI) will assess statistical uncertainty and value for further research,  
21 including for example the value of longer follow-up to assess medium-to-long term impacts.<sup>66</sup>  
22 Finally, a budget impact analysis (BIA) will be undertaken where there are positive and attributable  
23 impacts regarding primary and/or secondary outcomes (captured in the CCA). This will estimate the  
24 overall financial cost if Hubs were scaled-up across NSW to inform policy affordability  
25 considerations. The latter will involve estimating the potential Hubs would be made and an average  
26 cost (of the three Hubs) applied, with high and low estimates in a sensitivity analysis.  
27  
28  
29  
30  
31  
32  
33  
34  
35  
36

### 37 **Data Management** 38

39 All participants will be allocated a randomly generated unique identifier code to be used throughout  
40 the study. Project officers will have identified information of the participants enrolled at their site,  
41 stored in password protected files. The project officer within each LHD will work with data  
42 managers to extract routinely collected clinical data from electronic medical records for all  
43 participants, per Table 3. Data will be stored within a protected site-based server. Only deidentified  
44 data will be transferred from each LHD to the researchers (SW, KO, NH) for data analysis, using  
45 encrypted transfer.  
46  
47  
48  
49  
50  
51

52 Project officers with support from CCWs and/or interpreters will collect surveys at baseline, 6  
53  
54  
55  
56  
57  
58  
59  
60

1  
2  
3 months postpartum, and 12 months postpartum. The survey can be completed in hardcopy (face-to-  
4 face or telephone) or online by participants using a secure link to REDCap®. Subsequently, project  
5 officers who can access the identifying information within each LHD will enter survey data into the  
6 REDCap® database. REDCap® is hosted on the University of NSW (UNSW) infrastructure.

7  
8  
9  
10 Permissions granted to each user within each REDCap® project is controlled by and is the  
11 responsibility of the project team. Hardcopy materials will be stored in locked cabinets for the  
12 required period, either indefinitely if the participant consents to providing their data for data pooling  
13 or for 15 years after the completion of the study. After these periods, hardcopy materials will be  
14 destroyed and password-protected electronic archives will be deleted.

15  
16  
17  
18  
19 The identifying information collected within each LHD will be compiled into a single password-  
20 protected file and sent to The Centre for Health Record Linkage (CHeReL) for data linkage. The  
21 minimum identifying information for mothers and infants will be used to extract participant records  
22 from the administrative data. Upon completion of data extraction, CHeReL will transfer to UNSW  
23 administrative data of the participants who consented to data linkage. The administrative records will  
24 be deidentified by CHeReL, which will create the person project number (PPN) for each participant.  
25 The PPN will be linked to the participant's unique project identification number to link the  
26 administrative records with the electronic medical record (eMR) and survey records that belong to  
27 the same participant.

### 28 29 30 31 32 33 34 35 **Patient and Public Involvement**

36  
37 The research questions were developed based on qualitative research undertaken with Hub  
38 participants and community members and service providers in the pilot study.<sup>41 67</sup> The FDCC team  
39 have a consumer representative and consultation was undertaken with local Hub partner services.  
40 The researchers also consulted multicultural health services, including cultural support workers, to  
41 ensure research materials are culturally nuanced. Patients or participants have not directly been  
42 involved in the current study design.

### 43 44 45 46 47 48 49 **ETHICS AND DISSEMINATION**

50  
51 Ethical approval was granted by the South Eastern Sydney LHD (SESLHD) (2020/ETH03295). This  
52 trial was registered with the Australian New Zealand Clinical Trials (ACTRN12621001088831).

53  
54  
55  
56  
57  
58  
59  
60

## **Confidentiality**

The researchers acknowledge that ensuring confidentiality is essential. The researchers will exercise due diligence to anonymise participants' responses for reporting, publication, and presentation purposes. Only deidentified data will be transferred from each LHD to the UNSW researchers for data analysis. The deidentified data from each LHD to the UNSW team will be securely transferred through a NSW Health-approved e-health platform.

## **Managing Potential Harms**

If issues are disclosed outside of the study parameters, mandatory NSW Health policy directives will apply (e.g., family and domestic violence, child protection matters). These will be managed as per current policies and practices within LHDs. The child protection and domestic violence counselling teams are readily accessible to provide advice and support if issues are identified. As the researchers are all mandatory reporters, they will inform participants that they are not able to maintain confidentiality when it relates to the safety of the participant, the child/ren, the family, and the wider community. These obligations are detailed in the PISCF (appendix 1).

## **Dissemination**

Data obtained for the study will be published in reports, peer reviewed journals and presented at appropriate conferences. The de-identified data will be available to all investigators. Access by individuals' other than the named investigators will only be permitted after consideration and agreement by all the remaining investigators. An essential element of knowledge translation are the study partners and advisors who will share findings and consider if and how to progress to trialling or implementing the program at scale. We intend to produce at least two papers (e.g. protocol, main findings) for peer-review publication, written by core research and implementation team.

## **Study governance**

The FDCC Team will support planning, implementation and governance of the project and ensure that WH&S requirements and policies are considered and actioned. There are currently no procedures for auditing trial conduct. All protocol modifications will be discussed within all levels of governance and communicated to the SESLHD HREC. Figure 2 outlines our governance structure.

20

1  
2  
3 [INSERT FIGURE 2]  
4  
5

### 6 **Author contributions**

7  
8 The original trial design was conceived by SW, TR, AW, RL, VE and HR. The implementation  
9 evaluation design was conceived by MH and RL. The economic evaluation design was conceived by  
10 KL. The statistical analysis methods were initially designed by NH. MH developed the initial draft of  
11 the protocol, which was refined by SW, TR, AW, RL, VE, HR, KO, NH, KL, NS, AH, EM, SR,  
12 AMD, and AD. All authors approved, the final manuscript.  
13  
14  
15  
16

### 17 **Funding statement**

18 This project was funded by the NSW Health Translational Research Grants Scheme. The views  
19 expressed are those of the authors and not necessarily those of the partner organisations. Sue  
20 Woolfenden is funded through the National Health and Medical Research Council. Raghu Lingam is  
21 funded through the Financial Markets Foundation for Children. The project is supported in-kind by  
22 the Early Life Determinants of Health Clinical Academic Group, Maridulu Budyari Gumal  
23 (SPHERE).  
24  
25  
26  
27  
28  
29

### 30 **Competing interests**

31 The views expressed are those of the author(s) and not necessarily those of the funding partners.  
32 NSW Health has no direct role in study design; data collection, analysis, and interpretation, or  
33 writing of final reports, presentations, or publications.  
34  
35  
36  
37  
38  
39

### 40 **Acknowledgements**

41 This protocol has been authored on behalf of the FDCC Collaborative Group. The authors would like  
42 to acknowledge the members of the group not listed as authors: Melissa Green, John Eastwood,  
43 Karen Sorensen, Kim Lyle, Catherine Jones, Vicki Blight, Amit Arora, Michelle de Vroome,  
44 Andrew Hayen, Nick Hopwood, Virginia Schmied, Rebekah Grace, Jane Kohlhoff, Fiona Brooks,  
45 Cathy Kaplun, Kathleen Baird, Myna Hua, Lisa Woodland, Ben Harris-Roxas, Brendan Goodger,  
46 Tracey Szanto, Karen Zwi, and Grainne O'Loughlin.  
47  
48  
49  
50  
51  
52  
53

54 21  
55  
56  
57  
58  
59  
60

## REFERENCES

1. AEDC. Australian Early Development Census. <https://www.aedc.gov.au/data/data-explorer?id=135216>. 2020
2. COAG. COAG Health Council 2019 The Australian National Breastfeeding Strategy: 2019 and Beyond was prepared under the auspices of the COAG Health Council. 2019
3. Moore T, Arefadib N, Deery A, et al. The first thousand days: an evidence paper. *Melbourne: Murdoch Children's Research Institute* 2017
4. Goldfeld S, D'Abaco E, Bryson H, et al. Surveying social adversity in pregnancy: The antenatal risk burden experienced by Australian women. *Journal of paediatrics and child health* 2018;54(7):754-60.
5. NSW Ministry of Health. The First 2000 Days Framework. 2019
6. Goldfeld S, O'Connor M, Chong S, et al. The impact of multidimensional disadvantage over childhood on developmental outcomes in Australia. *International Journal of Epidemiology* doi:<https://doi.org/10.1093/ije/dyy087>
7. Woolfenden S, Asher I, Bauert P, et al. Summary of position statement on inequities in child health. 2018;54(8):832-33.
8. Rogers HJ, Hogan L, Coates D, et al. Responding to the health needs of women from migrant and refugee backgrounds—Models of maternity and postpartum care in high-income countries: A systematic scoping review. *Health & Social Care in the Community* 2020
9. Hiscock H, Danchin MH, Efron D, et al. Trends in paediatric practice in Australia: 2008 and 2013 national audits from the Australian Paediatric Research Network. *Journal of paediatrics and child health* 2017;53(1):55-61.
10. Palfrey JS, Tonniges TF, Green M, et al. Introduction: addressing the millennial morbidity—the context of community pediatrics. *Pediatrics* 2005;115(Supplement 3):1121-23.
11. Woolfenden S, Galea C, Smithers-Sheedy H, et al. Impact of social disadvantage on cerebral palsy severity. *Developmental Medicine & Child Neurology* 2019;61(5):586-92.
12. Brinkman S, Gregory T, Harris J, et al. Associations between the early development instrument at age 5, and reading and numeracy skills at ages 8, 10 and 12: a prospective linked data study. *Child Indicators Research* 2013;6(4):695-708.
13. Merrick MT, Ford DC, Ports KA, et al. Vital signs: Estimated proportion of adult health problems attributable to adverse childhood experiences and implications for prevention—25 States, 2015–2017. *Morbidity and Mortality Weekly Report* 2019;68(44):999.
14. Kezelman C, Hossack N, Stavropoulos P, et al. The cost of unresolved childhood trauma and abuse in adults in Australia, Adults Surviving Child Abuse and Pegasus Economics, Sydney. 2015
15. Woolfenden S, Eapen V, Jalaludin B, et al. Prevalence and factors associated with parental concerns about development detected by the Parents' Evaluation of Developmental Status (PEDS) at 6-month, 12-month and 18-month well-child checks in a birth cohort. *BMJ open* 2016;6(9):e012144.
16. Ayer C, Eapen V, Overs B, et al. Risk factors for non-participation in a universal developmental surveillance program in a population in Australia. *Australian Health Review*
17. Eapen V, Walter A, Guan J, et al. Maternal help-seeking for child developmental concerns: Associations with socio-demographic factors. *J Paediatr Child Health* 2017;53(10):963-69. doi: 10.1111/jpc.13607 [published Online First: 2017/07/01]

22

18. Zwi K, Rungan S, Woolfenden S, et al. Refugee children and their health, development and well-being over the first year of settlement: A longitudinal study. *Journal of paediatrics and child health* 2017;53(9):841-49.
19. NSW Health. NSW Child Health Survey 2009-2010 Summary report. 2010
20. McLean K, Goldfeld S, Molloy C, et al. Screening and surveillance in early childhood health: rapid review of evidence for effectiveness and efficiency of models. *Ultimo, NSW, Australia: The Sax Institute* 2014
21. Garg P, Ha MT, Eastwood J, et al. Explaining culturally and linguistically diverse (CALD) parents' access of healthcare services for developmental surveillance and anticipatory guidance: qualitative findings from the 'Watch Me Grow' study. *BMC health services research* 2017;17(1):228.
22. Almeida LM, Caldas J, Ayres-de-Campos D, et al. Maternal healthcare in migrants: a systematic review. *Matern Child Health J* 2013;17(8):1346-54. doi: <https://dx.doi.org/10.1007/s10995-012-1149-x> [published Online First: 2013/01/22]
23. Fellmeth G, Fazel M, Plugge E. Migration and perinatal mental health in women from low- and middle-income countries: a systematic review and meta-analysis. *BJOG* 2017;124(5):742-52. doi: <https://doi.org/10.1111/1471-0528.14184> [published Online First: 2016/06/21]
24. World Health Organization (WHO). Promoting the health of refugees and migrants: Framework of priorities and guiding principles to promote the health of refugees and migrants. Geneva: WHO Secretariat, 2017:1-4.
25. Higginbottom G, Morgan M, Alexandre M, et al. Immigrant women's experiences of maternity-care services in Canada: a systematic review using a narrative synthesis. *Syst Rev* 2015;4(13):13. doi: <https://doi.org/10.1186/2046-4053-4-13> [published Online First: 2015/07/19]
26. Correa-Velez I, Ryan J. Developing a best practice model of refugee maternity care. *Women Birth* 2012;25(1):13-22. doi: <https://dx.doi.org/10.1016/j.wombi.2011.01.002> [published Online First: 2011/02/15]
27. Henderson S, Kendall E. Culturally and linguistically diverse peoples' knowledge of accessibility and utilisation of health services: exploring the need for improvement in health service delivery. *Aust J Prim Health* 2011;17(2):195-201. doi: <https://doi.org/10.1071/PY10065> [published Online First: 2011/06/08]
28. Heslehurst N, Brown H, Pemu A, et al. Perinatal health outcomes and care among asylum seekers and refugees: a systematic review of systematic reviews. *BMC Medicine* 2018;16(1) doi: <https://doi.org/10.1186/s12916-018-1064-0> [published Online First: 2018/06/13]
29. Boyle JA, Willey S, Abbasova G. Supporting better outcomes for migrant and refugee women. *O&G Magazine* 2018; 20(1). <https://www.ogmagazine.org.au/20/1-20/better-outcomes-migrant-refugee-women/>.
30. Small R, Roth C, Raval M, et al. Immigrant and non-immigrant women's experiences of maternity care: a systematic and comparative review of studies in five countries. *BMC Pregnancy Childbirth* 2014;14(152):1-17. doi: 10.1186/1471-2393-14-152 [published Online First: 2014/04/30]
31. Woolfenden S, Posada N, Krchnakova R, et al. Equitable access to developmental surveillance and early intervention - understanding the barriers for children from culturally and linguistically diverse (CALD) backgrounds. *Health Expectations* 2015;18(6):3286-301. doi:

23

- 10.1111/hex.12318
32. Woolfenden S, Posada N, Krchnakova R, et al. Equitable access to developmental surveillance and early intervention - understanding the barriers for children from culturally and linguistically diverse (CALD) backgrounds. *Health Expect* doi: 101111/hex12318 2014
  33. Woolfenden S, Eapen V, Williams K, et al. A systematic review of the prevalence of parental concerns measured by the Parents' Evaluation of Developmental Status (PEDS) indicating developmental risk. *BMC Pediatr* 2014;14
  34. Woolfenden S, Galea C, Badland H, et al. Use of health services by preschool-aged children who are developmentally vulnerable and socioeconomically disadvantaged: testing the inverse care law. *J Epidemiol Community Health* 2020;74(6):495-501.
  35. Chando S, Craig JC, Burgess L, et al. Developmental risk among Aboriginal children living in urban areas in Australia: the Study of Environment on Aboriginal Resilience and Child Health (SEARCH). *BMC pediatrics* 2020;20(1):1-13.
  36. Alrashdi M, Hameed A, Cervantes Mendez MJ, et al. Education intervention with respect to the oral health knowledge, attitude, and behaviors of refugee families: A randomized clinical trial of effectiveness. *Journal of Public Health Dentistry* 2021;81(2):90-99. doi: <https://doi.org/10.1111/jphd.12415>
  37. Henry R. Review of health services for children, young people and families within the NSW Health system, 2019.
  38. National Academies of Sciences E, Medicine. Integrating Social Care Into the Delivery of Health Care: Moving Upstream to Improve the Nation's Health: Washington, DC: National Academies Press, 2019.
  39. Moore T. Using place-based approaches to strengthen child wellbeing. *Developing Practice: The Child, Youth and Family Work Journal* 2014(40):40.
  40. Glover J, Samir N, Kaplun C, et al. The effectiveness of place-based interventions in improving development, health and wellbeing outcomes in children aged 0–6 years living in disadvantaged neighbourhoods in high-income countries – A systematic review. *Wellbeing, Space and Society* 2021;2:100064. doi: <https://doi.org/10.1016/j.wss.2021.100064>
  41. Edwards K, Rimes T, Smith R, et al. Improving Access to Early Childhood Developmental Surveillance for Children from Culturally and Linguistically Diverse (CALD) Background. *Int J Integr Care* 2020;Apr;20(2)
  42. Edwards K, Fernandez R, Rimes T, et al. “Happy, Healthy, Ready – working with early childhood non-government organisations for developmental surveillance for vulnerable children”. *Australian Journal of Advanced Nursing* 2020; 37(4)
  43. Alrashdi M, Cervantes Mendez MJ, Farokhi MR. A Randomized Clinical Trial Preventive Outreach Targeting Dental Caries and Oral-Health-Related Quality of Life for Refugee Children. *International Journal of Environmental Research and Public Health* 2021;18(4):1686.
  44. Rogers HJ, Hogan L, Coates D, et al. Cross Cultural Workers for women and families from migrant and refugee backgrounds: a mixed-methods study of service providers perceptions. *BMC Women's Health* 2021;21(1):222. doi: 10.1186/s12905-021-01368-4
  45. Rogers HJ, Hogan L, Coates D, et al.

A Bridge to Health: The Cross Cultural Workers in Maternity and Child and Family Health Service

24

- 1  
2  
3 for women and families from migrant and refugee backgrounds: A mixed-methods study of  
4 service providers perceptions in Sydney, Australia (Manuscript not yet published). 2020  
5  
6 46. Chan A-W, Tetzlaff JM, Gøtzsche PC, et al. SPIRIT 2013 explanation and elaboration: guidance  
7 for protocols of clinical trials. *Bmj* 2013;346  
8  
9 47. Damschroder LJ, Aron DC, Keith RE, et al. Fostering implementation of health services research  
10 findings into practice: a consolidated framework for advancing implementation science.  
11 *Implement Science* 2009;4(1):50.  
12  
13 48. Kirk MA, Kelley C, Yankey N, et al. A systematic review of the use of the consolidated framework  
14 for implementation research. *Implementation Science* 2016;11(72):1-13.  
15  
16 49. Proctor E, Silmere H, Raghavan R, et al. Outcomes for implementation research: conceptual  
17 distinctions, measurement challenges, and research agenda. *Administration and Policy in*  
18 *Mental Health and Mental Health Services Research* 2011;38(2):65-76.  
19  
20 50. Lawton B, Brandon PR, Cicchinelli L, et al. Logic Models: A Tool for Designing and Monitoring  
21 Program Evaluations. REL 2014-007. *Regional Educational Laboratory Pacific* 2014  
22  
23 51. U.S. Department of Health and Human Services Centres for Disease Control and Prevention.  
24 Introduction to program evaluation for public health programs: A self-study guide. Atlanta,  
25 GA: Centers for Disease Control and Prevention, 2011.  
26  
27 52. Li S-A, Jeffs L, Barwick M, et al. Organizational contextual features that influence the  
28 implementation of evidence-based practices across healthcare settings: a systematic integrative  
29 review. *Systematic Reviews* 2018;7(1):72. doi: 10.1186/s13643-018-0734-5  
30  
31 53. Kania J, Kramer M. Collective impact: Leland Stanford Jr. University 2011.  
32  
33 54. Michie S, Atkins L, West R. The behaviour change wheel. *A guide to designing interventions 1st*  
34 *ed Great Britain: Silverback Publishing* 2014:1003-10.  
35  
36 55. Smart JR. Collective impact: Evidence and implications for practice: Australian Institute of Family  
37 Studies Melbourne 2017.  
38  
39 56. Weiner BJ, Lewis CC, Stanick C, et al. Psychometric assessment of three newly developed  
40 implementation outcome measures. *Implementation Science* 2017;12(1):108.  
41  
42 57. Finch TL, Rapley T, Girling M, et al. Improving the normalization of complex interventions:  
43 measure development based on normalization process theory (NoMAD): study protocol.  
44 *Implementation Science* 2013;8(1):43. doi: 10.1186/1748-5908-8-43  
45  
46 58. Chapko MK, Liu CF, Perkins M, et al. Equivalence of two healthcare costing methods: bottom-up  
47 and top-down. *Health economics* 2009;18(10):1188-201.  
48  
49 59. O'Brien B, Drummond MF, Sculpher MJ, et al. Methods for the economic evaluation of health care  
50 programmes: Oxford university press 2015.  
51  
52 60. Cox JL, Holden JM, Sagovsky R. Detection of Postnatal Depression: Development of the 10-item  
53 Edinburgh Postnatal Depression Scale. *British Journal of Psychiatry* 1987;150(6):782-86. doi:  
54 10.1192/bjp.150.6.782 [published Online First: 2018/01/02]  
55  
56 61. Garg A, Toy S, Tripodis Y, et al. Addressing Social Determinants of Health at Well Child Care  
57 Visits: A Cluster RCT. *Pediatrics* 2015;135(2):e296-e304. doi: 10.1542/peds.2014-2888  
58  
59 62. NSW Department of Health. NSW Health/Families NSW Supporting Families Early Package –  
60 SAFE START Strategic Policy, 2009.  
63. Damschroder LJ, Lowery JC. Evaluation of a large-scale weight management program using the  
consolidated framework for implementation research (CFIR). *Implementation Science*  
2013;8(51):1-32.

25



- 1  
2  
3 64. Viney R, Norman R, King MT, et al. Time trade-off derived EQ-5D weights for Australia. *Value*  
4 *Health* 2011;14(6):928-36. doi: 10.1016/j.jval.2011.04.009 [published Online First:  
5 2011/09/15]  
6  
7 65. Huang L, Frijters P, Dalziel K, et al. Life satisfaction, QALYs, and the monetary value of health.  
8 *Social Science & Medicine* 2018;211:131-36. doi:  
9 <https://doi.org/10.1016/j.socscimed.2018.06.009>  
10  
11 66. Briggs AH, Weinstein MC, Fenwick EAL, et al. Model Parameter Estimation and Uncertainty  
12 Analysis: A Report of the ISPOR-SMDM Modeling Good Research Practices Task Force  
13 Working Group–6. *Medical Decision Making* 2012;32(5):722-32. doi:  
14 10.1177/0272989X12458348  
15  
16 67. Edwards B, Mullan K, Katz I, et al. The Stronger Families in Australia (SFIA) Study: Phase 2 The  
17 Stronger Families in Australia (SFIA) Study: Phase 2. 2014

18 FIGURE 1: FDCC IMPLEMENTATION EVALUATION LOGIC MODEL

19  
20  
21 FIGURE 2: FDCC GOVERNANCE STRUCTURE  
22  
23  
24  
25  
26  
27  
28  
29  
30  
31  
32  
33  
34  
35  
36  
37  
38  
39  
40  
41  
42  
43  
44  
45  
46  
47  
48  
49  
50  
51  
52  
53  
54  
55  
56  
57  
58  
59  
60

**CONTEXT**

**INTERVENTIONS**

**THEORETICAL FRAMEWORK**

**INTERMEDIATE OUTCOMES**

**LONG-TERM OUTCOMES**

**OUTER CONTEXT**

**INNER CONTEXT**

**Local area factors/LHD**

- Patient load
- Area socio-economic status
- Community health relationship with hospital
- Make up of community based agencies, public and private health services in area (Area mapping)

**Policy and governance context**

- Existing CAFH policy affecting practice
- First 2000 days
- NGO partners core business, funding bodies, governance board

**NGO factors**

- Partner buy in
- Diversity of partner services
- Alignment of partner services (Reciprocity between health & NGOs) Location
- Collaboration features (i.e. frequency of contact, regular meetings, services integrating in real time)
- Billing and funding

**Early childhood health staff factors**

- Organisational context Support of Hub intervention within practice
- Structure and delivery of hub model (times location, structure)
- Altered work flows
- Care navigation (dedicated role, clear pathways)
- Number of CFHN in Hub
- Involvement of allied health
- GP relationships (Bilingual, referrals, knowledge of CFH, Medicare eligible)

**Physical location**

- Services in the same building
- Soft entry through existing non-health, non-threatening service (i.e. playgroup)
- Accessible to migrant and refugee communities

**Integration of services**

- Referral pathways between services (supported/warm referral or proactive introduction)
- Communication between services
- Shared resources/training/measurement
- Common agenda

**Cultural sensitivity**

- Culturally sensitive practices
- Training and resources

**Key worker/ Navigator**

Point of contact between maternity and hub

**Collective Impact**

Collective impact is designed to create change on complex social issues, and draws on five conditions: common agenda, continuous communication, mutually reinforcing activities, backbone support and shared measurement.

**MECHANISMS OF CHANGE**

**Behaviour change wheel constructs**

- **Enablement** – Hub in a location that suits families, helping navigation to relevant services
- **Modelling** – Modelling health/NGO practices
- **Training** – Ensure staff have been trained in culturally sensitive practices. Shared language/ understanding of the model
- **Environment restructure** – Hub creating integrated care environment

**Service and community**

- Increased knowledge and capacity of local services to provide culturally sensitive care and address health and social needs.

**Child and Family**

- 60% of mothers/families attending CFH service at Hubs
- Increased Breastfeeding rates
- Early identification of psychosocial concerns
- Social needs met by improved service access
- Child at healthy weight

**System**

- Earlier intervention for health and social need, reduced hospital visits (ED presentations)
- Cost-effective model of care for NSW Health
- Evidence that access is feasible, appropriate and acceptable
- Replicable, acceptable, appropriate and sustainable models of care - First 2000 Days Framework.

**Child and Family**

- Mothers/families will have optimal mental health and children will be school ready

1  
2  
3  
4  
5  
6  
7  
8  
9  
10  
11  
12  
13  
14  
15  
16  
17  
18  
19  
20  
21  
22  
23  
24  
25  
26  
27  
28  
29  
30  
31  
32  
33  
34  
35  
36  
37  
38  
39  
40  
41

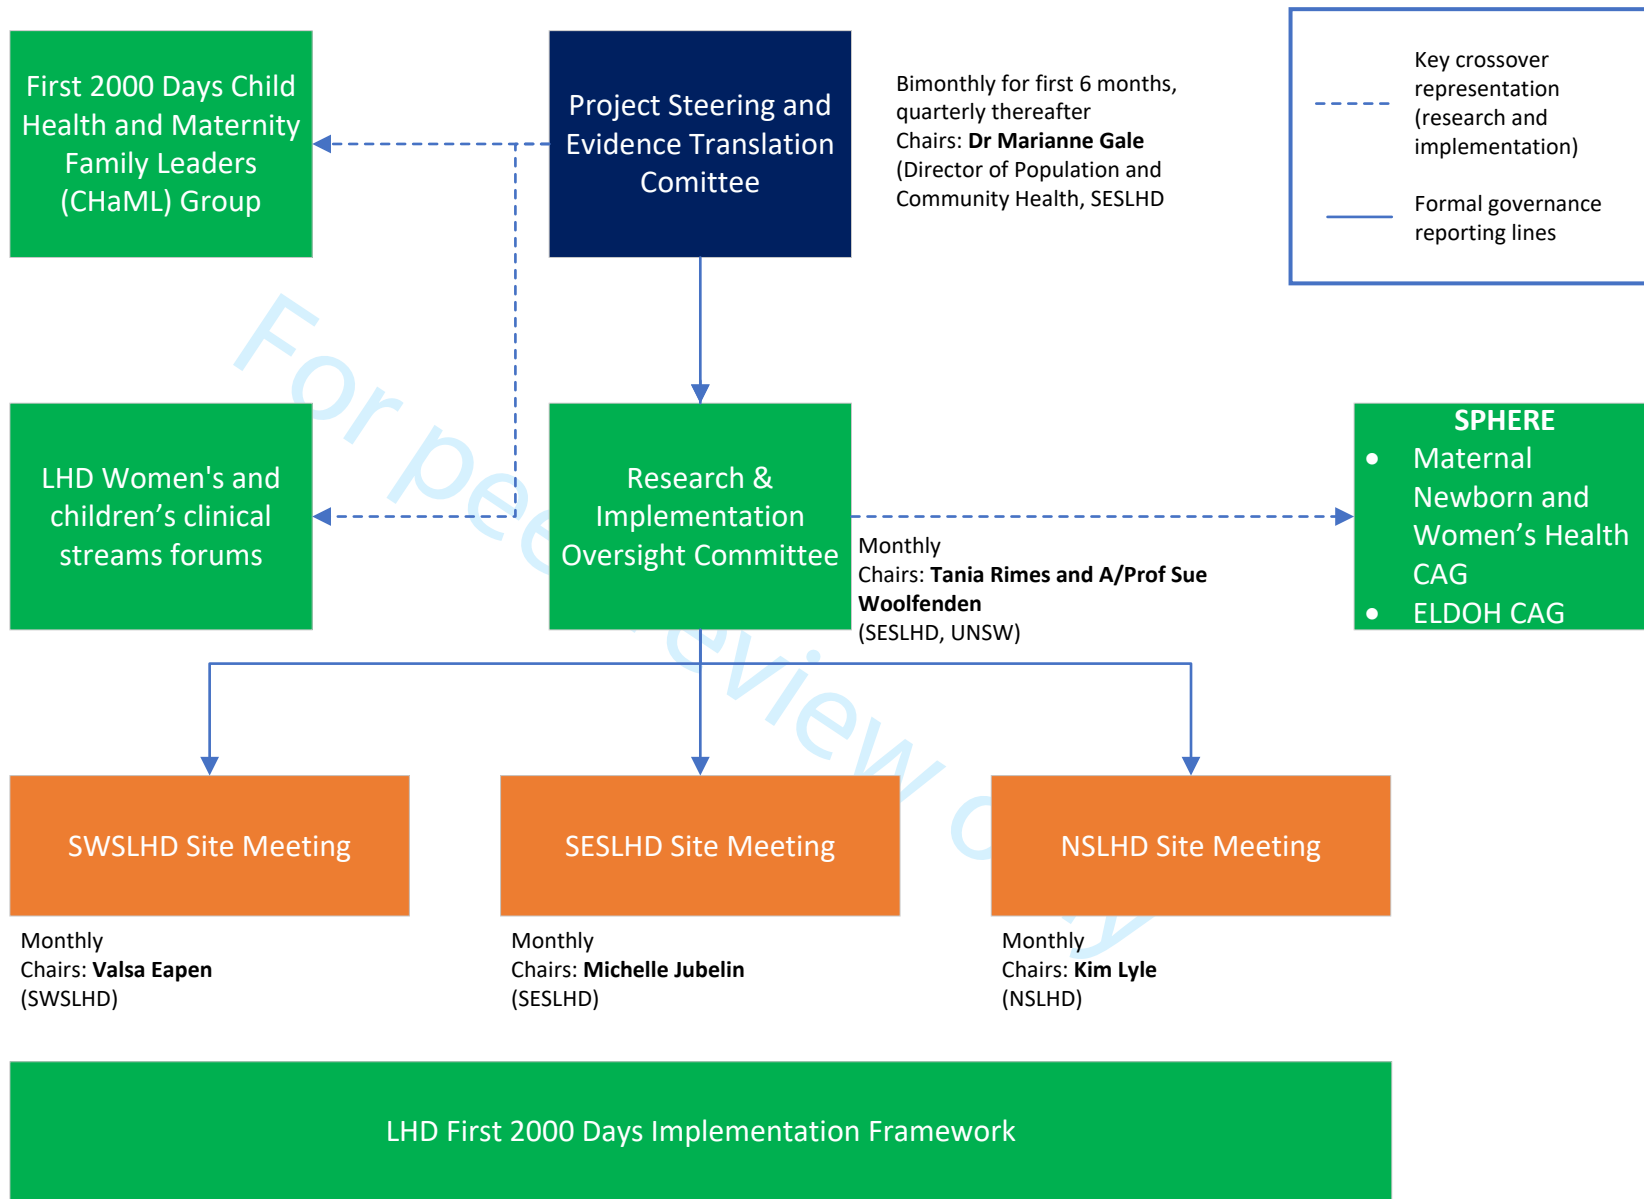

## APPENDICES

### Appendix 1: Participant Information Sheet and Consent Form

#### Primary and Community Health Directorate

#### PARTICIPANT INFORMATION SHEET AND CONSENT FORM Participant

#### **Family Care Connect – a holistic first 2000 days model of care for women and families from migrant and refugee communities.**

##### Invitation

You are invited to take part in the Family Care Connect project. Family Care Connect involves child and family Hubs, where health and other agencies work together and you are supported to navigate these services. Our research is seeing whether these Hubs support the health and development of children, mothers and families from migrant and refugee communities.

##### Who is doing the research?

Tania Rimes

Children and Communities Program Coordinator

Primary and Community Health Directorate | South Eastern Sydney Local Health District (SESLHD).

Associate Professor Sue Woolfenden (Research lead)

NHMRC Senior Research Fellow, Population Child Health Group | The University of New South Wales (UNSW). Senior Staff Specialist, Community Child Health | Sydney Children's Hospitals Network.

Before you decide if you want to take part in this research, we would like to explain what we are doing and why we are doing it. . Please take the time to read the following information carefully. You can talk about it with a relative or a friend if you wish before deciding.

##### What is the purpose of this research?

We want to see if child and family Hubs help women and families from migrant and refugee communities move from pregnancy to Child and Family Health services. Also, we want to see if these Hubs support children's health and development in the first 12 months of life.

We will also look at how easy and cost-effective the Hub is for you and other women and families.

##### Why have I been invited to participate in this research?

You are eligible to participate in this research because you:

- are having your baby or recently given birth to your baby at [INSERT HOSPITAL SITES]
- live in the postcode of [INSERT POSTCODE/S]

- are at least 20 weeks pregnant, OR have recently given birth to your baby and have not been discharged home from postnatal ward
- are a newly arrived migrant (within the last 10 years) from a non-English speaking background; or a refugee (living in Australia for less than 10 years) from a non-English speaking background
- are 16 years of age or older.

### If I say yes, what will it involve?

If you decide to take part in the research and live in [INSERT SITE AREA] you will be in the **'FDCC Group'**. You will receive information about the child and family services in your area you can access after the birth of your baby. This information is given to all women, regardless of whether or not they participate in the study.

If you take part in the **"FDCC Group"**, you will also be contacted by a worker from the local child and family Hub who will give you more information on the services offered and assist you with accessing these services if you choose.

If you agree to take part, we will ask you to sign the Participant Information and Consent form below; OR sign the online consent found here [INSERT ONLINE CONSENT URL]; OR provide verbal consent over the telephone to the contact person for the research.

After you provide consent to take part in this research, we will ask you to:

- Complete a survey about you, your family, your support needs, and your wellbeing. This will take about 30 minutes. You can choose to do it online, by paper, over the phone, or in-person. **We can provide an interpreter to assist.**
- Complete another survey when your baby is 6 months and 12 months old. This will ask questions about you, what your needs are, and what services you have used. **We can provide an interpreter to assist.**
- We will also collect data from your local and state-wide hospital/s about you and your baby. This reduces the number of questions we need to ask you.

The data we collect from local hospitals includes:

- Information about you and your child such as country of birth, date of birth, gender, language spoken at home
- Information from routine questions asked to all women when they come to hospital about their health and wellbeing and their child's
- Information about the services you or your child has seen, for example the child and family health nurse.

The data we collect from state-wide hospitals includes:

- Information that is collected on all new mothers and babies in NSW
- Emergency Department presentations for you and your baby

**If you don't want us to collect data about you and your baby from state-wide hospitals, then we won't. Please let us know by checking the box.**

**I DO NOT want my state-wide hospital data included as part of this research**

1  
2  
3  
4 **If you only provide verbal consent, we will not collect data about you and your baby**  
5 **from state-wide hospitals.**

6 As part of this research, we may also invite you to be interviewed. We will contact you at  
7 another time to discuss this process before the research is complete.  
8  
9

10 Any information we collect that can identify you or your child will remain confidential.  
11

12 The total time you are involved with this project will be for 12 to 18 months, but you can  
13 choose to withdraw at any time.  
14

15  
16 **What if I don't want to take part in this research, or if I want to withdraw later?**

17 It is completely up to you whether or not you decide to take part. Saying yes or no will not  
18 affect your relationship with the care you receive, the services you access, or your visa  
19 status now or in the future.  
20

21 If you wish to leave the research once it has started, you can do so verbally or in writing at  
22 any time without giving a reason. However, it may not be possible to withdraw your data  
23 from the research results once we have collected it and removed your identifying details.  
24 This is due to be done from March 2023.  
25  
26

27 **How is this research being paid for?**

28 The research is being paid for by NSW Health as part of the Translational Research Grant  
29 Scheme. More information about this scheme can be found here:

30 <https://www.medicalresearch.nsw.gov.au/translational-research-grants-scheme/>  
31  
32

33 **Are there risks to me in taking part in this research?**

34 There is very little risk to you, however if you become upset or distressed because of taking  
35 part in the research, the research team will arrange for counselling or other help. Any  
36 counselling or help will be provided by qualified staff who are not members of the research  
37 team. This will be provided free of charge.  
38  
39

40 Another risk in taking part in this research is the risk to your privacy as part of collecting  
41 data about you, your child, and your family. While this is a risk, we will take all the steps to  
42 ensure your information remains private and confidential. We do not collect you or your  
43 baby's name, or anything else that could identify you or your family. Instead, your name will  
44 be replaced with a number. Only people involved with this research will be able to tell that  
45 the information is about you.  
46  
47

48 **What happens if I suffer injury or complications as a result of the research?**

49 It is very unlikely that you will suffer any injury as we are only asking you to complete  
50 questionnaires. However, if you require treatment or suffer loss as a result of the  
51 wrongdoing of any of the parties involved in the research, you can seek compensation. The  
52 cost of your treatment must be paid by the compensation you receive.  
53  
54

55 **Will I benefit from the research?**

56 This research aims to determine how best to provide child health services for families and  
57 to improve how parents in the future access child and family health services, however it  
58 may or may not directly benefit you or your baby.  
59  
60

### **Will taking part in this research cost me anything, and will I be paid?**

Taking part in this research will not cost you anything, nor will you be paid.

### **How will my confidentiality be protected?**

Any information that is collected about you as part of this research will remain private and confidential and will be discussed only with your permission, except as required by law. This means the research team are Mandatory Reporters and may need to speak with NSW Department of Communities and Justice if they are told or are concerned that a child is being hurt or is at risk of being hurt e.g. if there is abuse or violence in the home.

If such a situation happens, we would discuss this with you in private and arrange for you to speak with another professional if required.

Only the researchers named above will have access to your details. All information will be stored on a secure drive within [INSERT LHD SITES] and UNSW. We will keep the information for 5 years after the research ends. After this time, it will be destroyed.

In line with Australian, New South Wales, and other relevant laws, you have the right to access and correct the information we collect and store about you. Please contact us if you would like to access the information.

### **What happens with the results?**

If you give us your permission by providing your consent in written form, online, or verbally, we plan to publish the results in a report and in peer reviewed journals. We may also present results at professional forums and conferences to inform better ways of working and providing services.

We will also give a report on the research to the South Eastern Sydney Local Health District Human Research Ethics Committee.

In any report, publication, or presentation, information will be provided in such a way that you or your family cannot be identified.

### **What should I do if I want to discuss this research further before I decide?**

When you have read this information, the researcher interviewer/project officer will discuss it with you and answer any queries you may have. If you would like to know more at any stage, please do not hesitate to contact Tania Rimes, Principal Investigator on (02) 9382 8696 or email her at [tania.rimes@health.nsw.gov.au](mailto:tania.rimes@health.nsw.gov.au). If you need an interpreter, you can contact Tania through the Translating and Interpreting Service (TIS) on 131 450.

### **Who should I contact if I have concerns about the conduct of this research?**

This research has been approved by the South Eastern Sydney Local Health District Human Research Ethics Committee. Any person with concerns or complaints about the conduct of this research should contact the Research Support Office which is nominated to receive complaints from research participants. You should contact them on 02 9382 3587, or email [SESLHD-RSO@health.nsw.gov.au](mailto:SESLHD-RSO@health.nsw.gov.au) and quote HREC reference number: 2020/ETH03295.

The conduct of this research is at the [INSERT SITE NAMES]. Any person with concerns or complaints about the conduct of this research may also contact the [*details of the Research Governance Officer of the health district will be provided following SSA application*]

1  
2  
3  
4 **Thank you for taking the time to consider this research.**  
5 **If you wish to take part in it, please sign the attached consent form.**  
6 **This information sheet is for you to keep.**  
7  
8  
9  
10  
11  
12  
13  
14  
15  
16  
17  
18  
19  
20  
21  
22  
23  
24  
25  
26  
27  
28  
29  
30  
31  
32  
33  
34  
35  
36  
37  
38  
39  
40  
41  
42  
43  
44  
45  
46  
47  
48  
49  
50  
51  
52  
53  
54  
55  
56  
57  
58  
59  
60

For peer review only



1  
2  
3  
4  
5  
6  
7  
8  
9  
10  
11  
12  
13  
14  
15  
16  
17  
18  
19  
20  
21  
22  
23  
24  
25  
26  
27  
28  
29  
30  
31  
32  
33  
34  
35  
36  
37  
38  
39  
40  
41  
42  
43  
44  
45  
46  
47  
48  
49  
50  
51  
52  
53  
54  
55  
56  
57  
58  
59  
60

## Primary and Community Health Directorate

### CONSENT FORM

**Family Care Connect – a holistic first 2000 days model of care for women and families from migrant and refugee communities.**

1. I,.....  
of.....  
agree to take part in the research described in the participant information statement set out above and to have my data linked as outlined in the information sheet.
2. I have read the participant information statement, which explains why I have been asked to take part, the aims of the research and the possible risks of the research, and the statement has been explained to me to my satisfaction.
3. Before signing this consent form, I have been able to ask any questions relating to any possible physical and mental harm I might suffer as a result of taking part and I have received satisfactory answers.
4. I understand that I can withdraw from the research at any time without affecting my relationship with South Eastern Sydney Local Health District or service at the child and family hub.
5. I agree that research information collected from the results of the research may be published and presented, provided that I cannot be identified.
6. I understand that if I have any questions relating to my participation in this research, I may contact Tania Rimes on telephone (02) 9382 8696, who will be happy to answer them. I can call 131450 (TIS) for language support.
7. I have been given a copy of this Consent Form and the Participant Information Statement.

Complaints may be directed to the Research Support Office, South Eastern Sydney Local Health District, Prince of Wales Hospital, Randwick NSW 2031 Australia (phone 02-9382 3587, fax 02-9382 2813, email [SESLHD-RSO@health.nsw.gov.au](mailto:SESLHD-RSO@health.nsw.gov.au)).

**Signature of participant**

**Please PRINT name**

**Date**

\_\_\_\_\_

\_\_\_\_\_

\_\_\_\_\_

**Signature of witness**

**Please PRINT name**

**Date**

\_\_\_\_\_

\_\_\_\_\_

\_\_\_\_\_

1  
2  
3  
4  
5  
6  
7  
8  
9  
10  
11  
12  
13  
14  
15  
16  
17  
18  
19  
20  
21  
22  
23  
24  
25  
26  
27  
28  
29  
30  
31  
32  
33  
34  
35  
36  
37  
38  
39  
40  
41  
42  
43  
44  
45  
46  
47  
48  
49  
50  
51  
52  
53  
54  
55  
56  
57  
58  
59  
60

**Signature of investigator**

**Please PRINT name**

**Date**

\_\_\_\_\_

Investigator/officer taking consent to complete:

Check box if participant DOES NOT want their state-wide hospital data included as part of this research

# Reporting checklist for protocol of a clinical trial.

Based on the SPIRIT guidelines.

## Instructions to authors

Complete this checklist by entering the page numbers from your manuscript where readers will find each of the items listed below.

Your article may not currently address all the items on the checklist. Please modify your text to include the missing information. If you are certain that an item does not apply, please write "n/a" and provide a short explanation.

Upload your completed checklist as an extra file when you submit to a journal.

In your methods section, say that you used the SPIRIT reporting guidelines, and cite them as:

Chan A-W, Tetzlaff JM, Gøtzsche PC, Altman DG, Mann H, Berlin J, Dickersin K, Hróbjartsson A, Schulz KF, Parulekar WR, Krleža-Jerić K, Laupacis A, Moher D. SPIRIT 2013 Explanation and Elaboration: Guidance for protocols of clinical trials. *BMJ*. 2013;346:e7586

|                                   | Reporting Item                                                                                                                  | Page Number |
|-----------------------------------|---------------------------------------------------------------------------------------------------------------------------------|-------------|
| <b>Administrative information</b> |                                                                                                                                 |             |
| Title                             | <a href="#">#1</a> Descriptive title identifying the study design, population, interventions, and, if applicable, trial acronym | 1           |
| Trial registration                | <a href="#">#2a</a> Trial identifier and registry name. If not yet                                                              | 17          |

|    |                     |                                                                         |    |
|----|---------------------|-------------------------------------------------------------------------|----|
| 1  |                     | registered, name of intended registry                                   |    |
| 2  |                     |                                                                         |    |
| 3  |                     |                                                                         |    |
| 4  | Trial registration: | <a href="#">#2b</a> All items from the World Health Organization Trial  |    |
| 5  |                     |                                                                         |    |
| 6  | data set            | Registration Data Set                                                   |    |
| 7  |                     |                                                                         |    |
| 8  |                     |                                                                         |    |
| 9  | Protocol version    | <a href="#">#3</a> Date and version identifier                          | 2  |
| 10 |                     |                                                                         |    |
| 11 |                     |                                                                         |    |
| 12 | Funding             | <a href="#">#4</a> Sources and types of financial, material, and other  | 19 |
| 13 |                     |                                                                         |    |
| 14 |                     | support                                                                 |    |
| 15 |                     |                                                                         |    |
| 16 |                     |                                                                         |    |
| 17 | Roles and           | <a href="#">#5a</a> Names, affiliations, and roles of protocol          | 19 |
| 18 |                     |                                                                         |    |
| 19 | responsibilities:   | contributors                                                            |    |
| 20 |                     |                                                                         |    |
| 21 | contributorship     |                                                                         |    |
| 22 |                     |                                                                         |    |
| 23 |                     |                                                                         |    |
| 24 |                     |                                                                         |    |
| 25 | Roles and           | <a href="#">#5b</a> Name and contact information for the trial sponsor  | 19 |
| 26 |                     |                                                                         |    |
| 27 | responsibilities:   |                                                                         |    |
| 28 |                     |                                                                         |    |
| 29 | sponsor contact     |                                                                         |    |
| 30 |                     |                                                                         |    |
| 31 | information         |                                                                         |    |
| 32 |                     |                                                                         |    |
| 33 |                     |                                                                         |    |
| 34 |                     |                                                                         |    |
| 35 | Roles and           | <a href="#">#5c</a> Role of study sponsor and funders, if any, in study | 19 |
| 36 |                     |                                                                         |    |
| 37 | responsibilities:   | design; collection, management, analysis, and                           |    |
| 38 |                     |                                                                         |    |
| 39 | sponsor and funder  | interpretation of data; writing of the report; and the                  |    |
| 40 |                     |                                                                         |    |
| 41 |                     | decision to submit the report for publication,                          |    |
| 42 |                     |                                                                         |    |
| 43 |                     | including whether they will have ultimate authority                     |    |
| 44 |                     |                                                                         |    |
| 45 |                     | over any of these activities                                            |    |
| 46 |                     |                                                                         |    |
| 47 |                     |                                                                         |    |
| 48 |                     |                                                                         |    |
| 49 | Roles and           | <a href="#">#5d</a> Composition, roles, and responsibilities of the     | 19 |
| 50 |                     |                                                                         |    |
| 51 | responsibilities:   | coordinating centre, steering committee, endpoint                       |    |
| 52 |                     |                                                                         |    |
| 53 | committees          | adjudication committee, data management team,                           |    |
| 54 |                     |                                                                         |    |
| 55 |                     | and other individuals or groups overseeing the                          |    |
| 56 |                     |                                                                         |    |
| 57 |                     |                                                                         |    |
| 58 |                     |                                                                         |    |
| 59 |                     |                                                                         |    |
| 60 |                     |                                                                         |    |

trial, if applicable (see Item 21a for data  
monitoring committee)

## Introduction

|                                                  |                     |                                                                                                                                                                                                            |     |
|--------------------------------------------------|---------------------|------------------------------------------------------------------------------------------------------------------------------------------------------------------------------------------------------------|-----|
| Background and rationale                         | <a href="#">#6a</a> | Description of research question and justification for undertaking the trial, including summary of relevant studies (published and unpublished) examining benefits and harms for each intervention         | 4   |
| Background and rationale: choice of comparators  | <a href="#">#6b</a> | Explanation for choice of comparators                                                                                                                                                                      | 4   |
| Objectives                                       | <a href="#">#7</a>  | Specific objectives or hypotheses                                                                                                                                                                          | 5-6 |
| Trial design                                     | <a href="#">#8</a>  | Description of trial design including type of trial (eg, parallel group, crossover, factorial, single group), allocation ratio, and framework (eg, superiority, equivalence, non-inferiority, exploratory) | 7   |
| <b>Methods:</b>                                  |                     |                                                                                                                                                                                                            |     |
| <b>Participants, interventions, and outcomes</b> |                     |                                                                                                                                                                                                            |     |
| Study setting                                    | <a href="#">#9</a>  | Description of study settings (eg, community clinic, academic hospital) and list of countries                                                                                                              | 6   |

|    |                      |                                                                           |                    |
|----|----------------------|---------------------------------------------------------------------------|--------------------|
| 1  |                      | where data will be collected. Reference to where                          |                    |
| 2  |                      |                                                                           |                    |
| 3  |                      | list of study sites can be obtained                                       |                    |
| 4  |                      |                                                                           |                    |
| 5  |                      |                                                                           |                    |
| 6  | Eligibility criteria | <a href="#">#10</a> Inclusion and exclusion criteria for participants. If | 6                  |
| 7  |                      |                                                                           |                    |
| 8  |                      | applicable, eligibility criteria for study centres and                    |                    |
| 9  |                      |                                                                           |                    |
| 10 |                      | individuals who will perform the interventions (eg,                       |                    |
| 11 |                      |                                                                           |                    |
| 12 |                      | surgeons, psychotherapists)                                               |                    |
| 13 |                      |                                                                           |                    |
| 14 |                      |                                                                           |                    |
| 15 |                      |                                                                           |                    |
| 16 | Interventions:       | <a href="#">#11a</a> Interventions for each group with sufficient detail  | 5,8                |
| 17 |                      |                                                                           |                    |
| 18 | description          | to allow replication, including how and when they                         |                    |
| 19 |                      |                                                                           |                    |
| 20 |                      | will be administered                                                      |                    |
| 21 |                      |                                                                           |                    |
| 22 |                      |                                                                           |                    |
| 23 | Interventions:       | <a href="#">#11b</a> Criteria for discontinuing or modifying allocated    | n/a                |
| 24 |                      |                                                                           |                    |
| 25 | modifications        | interventions for a given trial participant (eg, drug                     |                    |
| 26 |                      |                                                                           | There are no plans |
| 27 |                      |                                                                           | to discontinue or  |
| 28 |                      | dose change in response to harms, participant                             | modify the         |
| 29 |                      |                                                                           | interventions.     |
| 30 |                      | request, or improving / worsening disease)                                |                    |
| 31 |                      |                                                                           |                    |
| 32 |                      |                                                                           |                    |
| 33 |                      |                                                                           |                    |
| 34 |                      |                                                                           |                    |
| 35 |                      |                                                                           |                    |
| 36 | Interventions:       | <a href="#">#11c</a> Strategies to improve adherence to intervention      | 7                  |
| 37 |                      |                                                                           |                    |
| 38 | adherence            | protocols, and any procedures for monitoring                              |                    |
| 39 |                      |                                                                           |                    |
| 40 |                      | adherence (eg, drug tablet return; laboratory                             |                    |
| 41 |                      |                                                                           |                    |
| 42 |                      | tests)                                                                    |                    |
| 43 |                      |                                                                           |                    |
| 44 |                      |                                                                           |                    |
| 45 |                      |                                                                           |                    |
| 46 | Interventions:       | <a href="#">#11d</a> Relevant concomitant care and interventions that     | n/a                |
| 47 |                      |                                                                           |                    |
| 48 | concomitant care     | are permitted or prohibited during the trial                              |                    |
| 49 |                      |                                                                           |                    |
| 50 |                      |                                                                           |                    |
| 51 | Outcomes             | <a href="#">#12</a> Primary, secondary, and other outcomes,               | 12-15              |
| 52 |                      |                                                                           |                    |
| 53 |                      | including the specific measurement variable (eg,                          |                    |
| 54 |                      |                                                                           |                    |
| 55 |                      | systolic blood pressure), analysis metric (eg,                            |                    |
| 56 |                      |                                                                           |                    |
| 57 |                      |                                                                           |                    |
| 58 |                      |                                                                           |                    |
| 59 |                      |                                                                           |                    |
| 60 |                      |                                                                           |                    |

change from baseline, final value, time to event), method of aggregation (eg, median, proportion), and time point for each outcome. Explanation of the clinical relevance of chosen efficacy and harm outcomes is strongly recommended

|                      |                     |                                                                                                                                                                                       |     |
|----------------------|---------------------|---------------------------------------------------------------------------------------------------------------------------------------------------------------------------------------|-----|
| Participant timeline | <a href="#">#13</a> | Time schedule of enrolment, interventions (including any run-ins and washouts), assessments, and visits for participants. A schematic diagram is highly recommended (see Figure)      | 7   |
| Sample size          | <a href="#">#14</a> | Estimated number of participants needed to achieve study objectives and how it was determined, including clinical and statistical assumptions supporting any sample size calculations | 15  |
| Recruitment          | <a href="#">#15</a> | Strategies for achieving adequate participant enrolment to reach target sample size                                                                                                   | 6-7 |

## Methods:

### Assignment of interventions (for controlled trials)

|                                 |                      |                                                                                                                                             |   |
|---------------------------------|----------------------|---------------------------------------------------------------------------------------------------------------------------------------------|---|
| Allocation: sequence generation | <a href="#">#16a</a> | Method of generating the allocation sequence (eg, computer-generated random numbers), and list of any factors for stratification. To reduce | 7 |
|---------------------------------|----------------------|---------------------------------------------------------------------------------------------------------------------------------------------|---|

1 predictability of a random sequence, details of any  
 2  
 3 planned restriction (eg, blocking) should be  
 4  
 5 provided in a separate document that is  
 6  
 7 unavailable to those who enrol participants or  
 8  
 9 assign interventions  
 10

|    |                        |                                                                       |       |
|----|------------------------|-----------------------------------------------------------------------|-------|
| 11 |                        |                                                                       |       |
| 12 |                        |                                                                       |       |
| 13 | Allocation             | <a href="#">#16b</a> Mechanism of implementing the allocation         | 7     |
| 14 |                        |                                                                       |       |
| 15 | concealment            | sequence (eg, central telephone; sequentially                         |       |
| 16 |                        |                                                                       |       |
| 17 | mechanism              | numbered, opaque, sealed envelopes), describing                       |       |
| 18 |                        |                                                                       |       |
| 19 |                        | any steps to conceal the sequence until                               |       |
| 20 |                        |                                                                       |       |
| 21 |                        | interventions are assigned                                            |       |
| 22 |                        |                                                                       |       |
| 23 |                        |                                                                       |       |
| 24 |                        |                                                                       |       |
| 25 | Allocation:            | <a href="#">#16c</a> Who will generate the allocation sequence, who   | 7     |
| 26 |                        |                                                                       |       |
| 27 | implementation         | will enrol participants, and who will assign                          |       |
| 28 |                        |                                                                       |       |
| 29 |                        | participants to interventions                                         |       |
| 30 |                        |                                                                       |       |
| 31 |                        |                                                                       |       |
| 32 | Blinding (masking)     | <a href="#">#17a</a> Who will be blinded after assignment to          | 8     |
| 33 |                        |                                                                       |       |
| 34 |                        | interventions (eg, trial participants, care providers,                |       |
| 35 |                        |                                                                       |       |
| 36 |                        | outcome assessors, data analysts), and how                            |       |
| 37 |                        |                                                                       |       |
| 38 |                        |                                                                       |       |
| 39 |                        |                                                                       |       |
| 40 | Blinding (masking):    | <a href="#">#17b</a> If blinded, circumstances under which unblinding | 8     |
| 41 |                        |                                                                       |       |
| 42 | emergency              | is permissible, and procedure for revealing a                         |       |
| 43 |                        |                                                                       |       |
| 44 | unblinding             | participant's allocated intervention during the trial                 |       |
| 45 |                        |                                                                       |       |
| 46 |                        |                                                                       |       |
| 47 |                        |                                                                       |       |
| 48 | <b>Methods: Data</b>   |                                                                       |       |
| 49 |                        |                                                                       |       |
| 50 | <b>collection,</b>     |                                                                       |       |
| 51 |                        |                                                                       |       |
| 52 | <b>management, and</b> |                                                                       |       |
| 53 |                        |                                                                       |       |
| 54 | <b>analysis</b>        |                                                                       |       |
| 55 |                        |                                                                       |       |
| 56 |                        |                                                                       |       |
| 57 |                        |                                                                       |       |
| 58 | Data collection plan   | <a href="#">#18a</a> Plans for assessment and collection of outcome,  | 12-15 |
| 59 |                        |                                                                       |       |
| 60 |                        |                                                                       |       |



1 baseline, and other trial data, including any  
 2 related processes to promote data quality (eg,  
 3 duplicate measurements, training of assessors)  
 4 and a description of study instruments (eg,  
 5 questionnaires, laboratory tests) along with their  
 6 reliability and validity, if known. Reference to  
 7 where data collection forms can be found, if not in  
 8 the protocol  
 9  
 10  
 11  
 12  
 13  
 14  
 15  
 16  
 17  
 18

|    |                                             |                                                      |       |
|----|---------------------------------------------|------------------------------------------------------|-------|
| 19 | Data collection plan: <a href="#">#18b</a>  | Plans to promote participant retention and           | 14    |
| 20 | retention                                   | complete follow-up, including list of any outcome    |       |
| 21 |                                             | data to be collected for participants who            |       |
| 22 |                                             | discontinue or deviate from intervention protocols   |       |
| 23 |                                             |                                                      |       |
| 24 |                                             |                                                      |       |
| 25 |                                             |                                                      |       |
| 26 |                                             |                                                      |       |
| 27 |                                             |                                                      |       |
| 28 |                                             |                                                      |       |
| 29 | Data management <a href="#">#19</a>         | Plans for data entry, coding, security, and storage, | 15-16 |
| 30 |                                             | including any related processes to promote data      |       |
| 31 |                                             | quality (eg, double data entry; range checks for     |       |
| 32 |                                             | data values). Reference to where details of data     |       |
| 33 |                                             | management procedures can be found, if not in        |       |
| 34 |                                             | the protocol                                         |       |
| 35 |                                             |                                                      |       |
| 36 |                                             |                                                      |       |
| 37 |                                             |                                                      |       |
| 38 |                                             |                                                      |       |
| 39 |                                             |                                                      |       |
| 40 |                                             |                                                      |       |
| 41 |                                             |                                                      |       |
| 42 |                                             |                                                      |       |
| 43 |                                             |                                                      |       |
| 44 | Statistics: outcomes <a href="#">#20a</a>   | Statistical methods for analysing primary and        | 16    |
| 45 |                                             | secondary outcomes. Reference to where other         |       |
| 46 |                                             | details of the statistical analysis plan can be      |       |
| 47 |                                             | found, if not in the protocol                        |       |
| 48 |                                             |                                                      |       |
| 49 |                                             |                                                      |       |
| 50 |                                             |                                                      |       |
| 51 |                                             |                                                      |       |
| 52 |                                             |                                                      |       |
| 53 |                                             |                                                      |       |
| 54 | Statistics: additional <a href="#">#20b</a> | Methods for any additional analyses (eg,             | 16    |
| 55 | analyses                                    | subgroup and adjusted analyses)                      |       |
| 56 |                                             |                                                      |       |
| 57 |                                             |                                                      |       |
| 58 |                                             |                                                      |       |
| 59 |                                             |                                                      |       |
| 60 |                                             |                                                      |       |

|    |                            |                      |                                                   |       |
|----|----------------------------|----------------------|---------------------------------------------------|-------|
| 1  | Statistics: analysis       | <a href="#">#20c</a> | Definition of analysis population relating to     | 16    |
| 2  |                            |                      |                                                   |       |
| 3  | population and             |                      | protocol non-adherence (eg, as randomised         |       |
| 4  |                            |                      |                                                   |       |
| 5  | missing data               |                      | analysis), and any statistical methods to handle  |       |
| 6  |                            |                      |                                                   |       |
| 7  |                            |                      | missing data (eg, multiple imputation)            |       |
| 8  |                            |                      |                                                   |       |
| 9  |                            |                      |                                                   |       |
| 10 |                            |                      |                                                   |       |
| 11 | <b>Methods: Monitoring</b> |                      |                                                   |       |
| 12 |                            |                      |                                                   |       |
| 13 |                            |                      |                                                   |       |
| 14 | Data monitoring:           | <a href="#">#21a</a> | Composition of data monitoring committee (DMC);   | 16    |
| 15 |                            |                      |                                                   |       |
| 16 | formal committee           |                      | summary of its role and reporting structure;      |       |
| 17 |                            |                      |                                                   |       |
| 18 |                            |                      | statement of whether it is independent from the   |       |
| 19 |                            |                      |                                                   |       |
| 20 |                            |                      | sponsor and competing interests; and reference to |       |
| 21 |                            |                      |                                                   |       |
| 22 |                            |                      | where further details about its charter can be    |       |
| 23 |                            |                      |                                                   |       |
| 24 |                            |                      | found, if not in the protocol. Alternatively, an  |       |
| 25 |                            |                      |                                                   |       |
| 26 |                            |                      | explanation of why a DMC is not needed            |       |
| 27 |                            |                      |                                                   |       |
| 28 |                            |                      |                                                   |       |
| 29 |                            |                      |                                                   |       |
| 30 |                            |                      |                                                   |       |
| 31 | Data monitoring:           | <a href="#">#21b</a> | Description of any interim analyses and stopping  | 16    |
| 32 |                            |                      |                                                   |       |
| 33 | interim analysis           |                      | guidelines, including who will have access to     |       |
| 34 |                            |                      |                                                   |       |
| 35 |                            |                      | these interim results and make the final decision |       |
| 36 |                            |                      |                                                   |       |
| 37 |                            |                      | to terminate the trial                            |       |
| 38 |                            |                      |                                                   |       |
| 39 |                            |                      |                                                   |       |
| 40 |                            |                      |                                                   |       |
| 41 | Harms                      | <a href="#">#22</a>  | Plans for collecting, assessing, reporting, and   | 16-17 |
| 42 |                            |                      |                                                   |       |
| 43 |                            |                      | managing solicited and spontaneously reported     |       |
| 44 |                            |                      |                                                   |       |
| 45 |                            |                      | adverse events and other unintended effects of    |       |
| 46 |                            |                      |                                                   |       |
| 47 |                            |                      | trial interventions or trial conduct              |       |
| 48 |                            |                      |                                                   |       |
| 49 |                            |                      |                                                   |       |
| 50 |                            |                      |                                                   |       |
| 51 | Auditing                   | <a href="#">#23</a>  | Frequency and procedures for auditing trial       | 19    |
| 52 |                            |                      |                                                   |       |
| 53 |                            |                      | conduct, if any, and whether the process will be  |       |
| 54 |                            |                      |                                                   |       |
| 55 |                            |                      | independent from investigators and the sponsor    |       |
| 56 |                            |                      |                                                   |       |
| 57 |                            |                      |                                                   |       |
| 58 |                            |                      |                                                   |       |
| 59 |                            |                      |                                                   |       |
| 60 |                            |                      |                                                   |       |

1 **Ethics and**

2  
3 **dissemination**

|    |                    |                      |                                                        |
|----|--------------------|----------------------|--------------------------------------------------------|
| 4  |                    |                      |                                                        |
| 5  |                    |                      |                                                        |
| 6  |                    |                      |                                                        |
| 7  | Research ethics    | <a href="#">#24</a>  | Plans for seeking research ethics committee /          |
| 8  |                    |                      |                                                        |
| 9  | approval           |                      | institutional review board (REC / IRB) approval        |
| 10 |                    |                      |                                                        |
| 11 |                    |                      |                                                        |
| 12 | Protocol           | <a href="#">#25</a>  | Plans for communicating important protocol             |
| 13 |                    |                      |                                                        |
| 14 | amendments         |                      | modifications (eg, changes to eligibility criteria,    |
| 15 |                    |                      | outcomes, analyses) to relevant parties (eg,           |
| 16 |                    |                      | investigators, REC / IRBs, trial participants, trial   |
| 17 |                    |                      | registries, journals, regulators)                      |
| 18 |                    |                      |                                                        |
| 19 |                    |                      |                                                        |
| 20 |                    |                      |                                                        |
| 21 |                    |                      |                                                        |
| 22 |                    |                      |                                                        |
| 23 |                    |                      |                                                        |
| 24 | Consent or assent  | <a href="#">#26a</a> | Who will obtain informed consent or assent from        |
| 25 |                    |                      |                                                        |
| 26 |                    |                      | potential trial participants or authorised             |
| 27 |                    |                      | surrogates, and how (see Item 32)                      |
| 28 |                    |                      |                                                        |
| 29 |                    |                      |                                                        |
| 30 |                    |                      |                                                        |
| 31 |                    |                      |                                                        |
| 32 | Consent or assent: | <a href="#">#26b</a> | Additional consent provisions for collection and       |
| 33 |                    |                      |                                                        |
| 34 | ancillary studies  |                      | use of participant data and biological specimens       |
| 35 |                    |                      |                                                        |
| 36 |                    |                      | in ancillary studies, if applicable                    |
| 37 |                    |                      |                                                        |
| 38 |                    |                      |                                                        |
| 39 |                    |                      |                                                        |
| 40 |                    |                      |                                                        |
| 41 |                    |                      |                                                        |
| 42 |                    |                      |                                                        |
| 43 | Confidentiality    | <a href="#">#27</a>  | How personal information about potential and           |
| 44 |                    |                      |                                                        |
| 45 |                    |                      | enrolled participants will be collected, shared, and   |
| 46 |                    |                      |                                                        |
| 47 |                    |                      | maintained in order to protect confidentiality         |
| 48 |                    |                      |                                                        |
| 49 |                    |                      | before, during, and after the trial                    |
| 50 |                    |                      |                                                        |
| 51 |                    |                      |                                                        |
| 52 | Declaration of     | <a href="#">#28</a>  | Financial and other competing interests for            |
| 53 |                    |                      |                                                        |
| 54 | interests          |                      | principal investigators for the overall trial and each |
| 55 |                    |                      |                                                        |
| 56 |                    |                      | study site                                             |
| 57 |                    |                      |                                                        |
| 58 |                    |                      |                                                        |
| 59 |                    |                      |                                                        |
| 60 |                    |                      |                                                        |

|    |                       |                      |                                                        |                    |
|----|-----------------------|----------------------|--------------------------------------------------------|--------------------|
| 1  | Data access           | <a href="#">#29</a>  | Statement of who will have access to the final trial   | 16                 |
| 2  |                       |                      | dataset, and disclosure of contractual agreements      |                    |
| 3  |                       |                      | that limit such access for investigators               |                    |
| 4  |                       |                      |                                                        |                    |
| 5  |                       |                      |                                                        |                    |
| 6  |                       |                      |                                                        |                    |
| 7  |                       |                      |                                                        |                    |
| 8  | Ancillary and post    | <a href="#">#30</a>  | Provisions, if any, for ancillary and post-trial care, | n/a                |
| 9  | trial care            |                      | and for compensation to those who suffer harm          | This is a low-risk |
| 10 |                       |                      | from trial participation                               | trial with minimal |
| 11 |                       |                      |                                                        | foreseen harms to  |
| 12 |                       |                      |                                                        | participants.      |
| 13 |                       |                      |                                                        |                    |
| 14 |                       |                      |                                                        |                    |
| 15 |                       |                      |                                                        |                    |
| 16 |                       |                      |                                                        |                    |
| 17 |                       |                      |                                                        |                    |
| 18 |                       |                      |                                                        |                    |
| 19 |                       |                      |                                                        |                    |
| 20 |                       |                      |                                                        |                    |
| 21 |                       |                      |                                                        |                    |
| 22 | Dissemination         | <a href="#">#31a</a> | Plans for investigators and sponsor to                 | 17                 |
| 23 | policy: trial results |                      | communicate trial results to participants,             |                    |
| 24 |                       |                      | healthcare professionals, the public, and other        |                    |
| 25 |                       |                      | relevant groups (eg, via publication, reporting in     |                    |
| 26 |                       |                      | results databases, or other data sharing               |                    |
| 27 |                       |                      | arrangements), including any publication               |                    |
| 28 |                       |                      | restrictions                                           |                    |
| 29 |                       |                      |                                                        |                    |
| 30 |                       |                      |                                                        |                    |
| 31 |                       |                      |                                                        |                    |
| 32 |                       |                      |                                                        |                    |
| 33 |                       |                      |                                                        |                    |
| 34 |                       |                      |                                                        |                    |
| 35 |                       |                      |                                                        |                    |
| 36 |                       |                      |                                                        |                    |
| 37 |                       |                      |                                                        |                    |
| 38 | Dissemination         | <a href="#">#31b</a> | Authorship eligibility guidelines and any intended     | 17                 |
| 39 | policy: authorship    |                      | use of professional writers                            |                    |
| 40 |                       |                      |                                                        |                    |
| 41 |                       |                      |                                                        |                    |
| 42 |                       |                      |                                                        |                    |
| 43 |                       |                      |                                                        |                    |
| 44 | Dissemination         | <a href="#">#31c</a> | Plans, if any, for granting public access to the full  | 17                 |
| 45 | policy: reproducible  |                      | protocol, participant-level dataset, and statistical   |                    |
| 46 |                       |                      | code                                                   |                    |
| 47 |                       |                      |                                                        |                    |
| 48 |                       |                      |                                                        |                    |
| 49 |                       |                      |                                                        |                    |
| 50 |                       |                      |                                                        |                    |
| 51 | <b>Appendices</b>     |                      |                                                        |                    |
| 52 |                       |                      |                                                        |                    |
| 53 |                       |                      |                                                        |                    |
| 54 | Informed consent      | <a href="#">#32</a>  | Model consent form and other related                   | Supp. file         |
| 55 | materials             |                      | documentation given to participants and                |                    |
| 56 |                       |                      |                                                        |                    |
| 57 |                       |                      |                                                        |                    |
| 58 |                       |                      |                                                        |                    |
| 59 |                       |                      |                                                        |                    |
| 60 |                       |                      |                                                        |                    |

1 authorised surrogates

2  
3  
4 Biological [#33](#) Plans for collection, laboratory evaluation, and n/a  
5  
6 specimens storage of biological specimens for genetic or No biological  
7  
8 molecular analysis in the current trial and for specimens will be  
9  
10 future use in ancillary studies, if applicable collected as part of  
11  
12  
13  
14  
15  
16  
17  
18  
19  
20  
21  
22  
23  
24  
25  
26  
27  
28  
29  
30  
31  
32  
33  
34  
35  
36  
37  
38  
39  
40  
41  
42  
43  
44  
45  
46  
47  
48  
49  
50  
51  
52  
53  
54  
55  
56  
57  
58  
59  
60

|                      |                     |                                                                                                                                                                                                |                                                                         |
|----------------------|---------------------|------------------------------------------------------------------------------------------------------------------------------------------------------------------------------------------------|-------------------------------------------------------------------------|
| Biological specimens | <a href="#">#33</a> | Plans for collection, laboratory evaluation, and storage of biological specimens for genetic or molecular analysis in the current trial and for future use in ancillary studies, if applicable | n/a<br>No biological specimens will be collected as part of this trial. |
|----------------------|---------------------|------------------------------------------------------------------------------------------------------------------------------------------------------------------------------------------------|-------------------------------------------------------------------------|

None The SPIRIT Explanation and Elaboration paper is distributed under the terms of the Creative Commons Attribution License CC-BY-NC. This checklist can be completed online using <https://www.goodreports.org/>, a tool made by the [EQUATOR Network](#) in collaboration with [Penelope.ai](#)
